# Supplementary material for: Mortality in Persons With Autism Spectrum Disorder or Attention-Deficit/Hyperactivity Disorder: A Systematic Review and Meta-analysis
Source: PubMed Central journal article supplement (PMC8845021; doi:10.1001/jamapediatrics.2021.6401), 2022-02-14
Supplement: jamapediatr-e216401-s001.pdf [file jamapediatr-e216401-s001.pdf]

## Supplemental Online Content

Catalá-López F, Hutton B, Page MJ, et al. Mortality in persons with autism spectrum disorder or attention-deficit/hyperactivity disorder: a systematic review and meta-analysis. *JAMA Pediatr*. Published online February 14, 2022.  
doi:10.1001/jamapediatrics.2021.6401

**eTable 1.** PRISMA 2020 checklist

**eTable 2.** MOOSE checklist

**eTable 3.** Coding and classification of causes of death

**eTable 4.** Methods clarifications/modifications from the protocol

**eTable 5.** Search strategy

**eTable 6.** List of excluded studies

**eTable 7.** List of studies where authors were contacted for additional clarifications or data

**eTable 8.** Main characteristics of included studies

**eTable 9.** Main results of individual studies

**eTable 10.** Methodological quality assessment of included studies (Newcastle-Ottawa Scale)

**eTable 11.** Grading certainty (or credibility) of evidence for summary estimates.

**eTable 12.** Summary statistics of risk of mortality in people with ASD/ADHD people

**eFigure 1.** Secondary outcome. Unnatural causes of death among ASD/ADHD people

**eFigure 2.** Secondary outcome. Natural causes of death among ASD/ADHD people

**eFigure 3.** Secondary outcome. Deaths caused by nervous system disorders among ASD people

**eFigure 4.** Secondary outcome. Deaths caused by neoplasms among ASD people

**eFigure 5.** Secondary outcome. Deaths caused by respiratory system diseases among ASD people

**eFigure 6.** Secondary outcome. Deaths caused by digestive system disorders among ASD people

**eFigure 7.** Secondary outcome. Deaths caused by congenital malformations among ASD people

**eFigure 8.** Subgroup analyses. ASD comorbidity and all-cause mortality among ASD people

**eFigure 9.** Subgroup analyses. ADHD comorbidity and all-cause mortality among ADHD people

**eFigure 10.** Subgroup analyses. Age group at first diagnosis and all-cause mortality among ASD people

**eFigure 11.** Subgroup analyses. Age group at first diagnosis and all-cause mortality among ADHD people

**eFigure 12.** Subgroup analyses. Cohort/sample size and all-cause mortality among ASD people

**eFigure 13.** Subgroup analyses. Cohort/sample size and all-cause mortality among ADHD people

**eFigure 14.** Subgroup analyses. Setting and all-cause mortality among ASD people

**eFigure 15.** Subgroup analyses. Setting and all-cause mortality among ADHD people

**eFigure 16.** Subgroup analyses. Follow-up (in years) and all-cause mortality among ASD people

**eFigure 17.** Subgroup analyses. Follow-up (in years) and all-cause mortality among ADHD people

**eFigure 18.** Subgroup analyses. Study quality/risk of bias and all-cause mortality among ASD people

**eFigure 19.** Subgroup analyses. Study quality/risk of bias and all-cause mortality among ADHD people

**eFigure 20.** Subgroup analyses. Adjustment for potential confounders and all-cause mortality among ASD people

**eFigure 21.** Subgroup analyses. Adjustment for potential confounders and all-cause mortality among ADHD people

**eFigure 22.** Funnel plot for primary outcome of all-cause mortality in people with ASD

**eFigure 23.** Treemap summarizing the amount of data according to specific causes of death

This supplemental material has been provided by the authors to give readers additional information about their work.

**eTable 1. PRISMA 2020 checklist.**

| Section and Topic             | Item # | Checklist item                                                                                                                                                                                                                                                                                       | Location where item is reported            |
|-------------------------------|--------|------------------------------------------------------------------------------------------------------------------------------------------------------------------------------------------------------------------------------------------------------------------------------------------------------|--------------------------------------------|
| <b>TITLE</b>                  |        |                                                                                                                                                                                                                                                                                                      |                                            |
| Title                         | 1      | Identify the report as a systematic review.                                                                                                                                                                                                                                                          | 1                                          |
| <b>ABSTRACT</b>               |        |                                                                                                                                                                                                                                                                                                      |                                            |
| Abstract                      | 2      | See the PRISMA 2020 for Abstracts checklist.                                                                                                                                                                                                                                                         | 3 and 4                                    |
| <b>INTRODUCTION</b>           |        |                                                                                                                                                                                                                                                                                                      |                                            |
| Rationale                     | 3      | Describe the rationale for the review in the context of existing knowledge.                                                                                                                                                                                                                          | 7                                          |
| Objectives                    | 4      | Provide an explicit statement of the objective(s) or question(s) the review addresses.                                                                                                                                                                                                               | 8                                          |
| <b>METHODS</b>                |        |                                                                                                                                                                                                                                                                                                      |                                            |
| Eligibility criteria          | 5      | Specify the inclusion and exclusion criteria for the review and how studies were grouped for the syntheses.                                                                                                                                                                                          | 9                                          |
| Information sources           | 6      | Specify all databases, registers, websites, organisations, reference lists and other sources searched or consulted to identify studies. Specify the date when each source was last searched or consulted.                                                                                            | 8 and 9                                    |
| Search strategy               | 7      | Present the full search strategies for all databases, registers and websites, including any filters and limits used.                                                                                                                                                                                 | 8 and 9, and eTable 5                      |
| Selection process             | 8      | Specify the methods used to decide whether a study met the inclusion criteria of the review, including how many reviewers screened each record and each report retrieved, whether they worked independently, and if applicable, details of automation tools used in the process.                     | 10                                         |
| Data collection process       | 9      | Specify the methods used to collect data from reports, including how many reviewers collected data from each report, whether they worked independently, any processes for obtaining or confirming data from study investigators, and if applicable, details of automation tools used in the process. | 10                                         |
| Data items                    | 10a    | List and define all outcomes for which data were sought. Specify whether all results that were compatible with each outcome domain in each study were sought (e.g. for all measures, time points, analyses), and if not, the methods used to decide which results to collect.                        | 10 and 11                                  |
|                               | 10b    | List and define all other variables for which data were sought (e.g. participant and intervention characteristics, funding sources). Describe any assumptions made about any missing or unclear information.                                                                                         | 10 and 11                                  |
| Study risk of bias assessment | 11     | Specify the methods used to assess risk of bias in the included studies, including details of the tool(s) used, how many reviewers assessed each study and whether they worked independently, and if applicable, details of automation tools used in the process.                                    | 10                                         |
| Effect measures               | 12     | Specify for each outcome the effect measure(s) (e.g. risk ratio, mean difference) used in the synthesis or presentation of results.                                                                                                                                                                  | 11                                         |
| Synthesis methods             | 13a    | Describe the processes used to decide which studies were eligible for each synthesis (e.g. tabulating the study intervention characteristics and comparing against the planned groups for each synthesis (item #5)).                                                                                 | 11                                         |
|                               | 13b    | Describe any methods required to prepare the data for presentation or synthesis, such as handling of missing summary statistics, or data conversions.                                                                                                                                                | 11, and eTables 8                          |
|                               | 13c    | Describe any methods used to tabulate or visually display results of individual studies and syntheses.                                                                                                                                                                                               | 11, and Fig. 2, 3 and 4, and eFigures 1-22 |
|                               | 13d    | Describe any methods used to synthesize results and provide a rationale for the choice(s). If meta-analysis was performed, describe the model(s), method(s) to identify the presence and extent of statistical heterogeneity, and software package(s) used.                                          | 11                                         |
|                               | 13e    | Describe any methods used to explore possible causes of heterogeneity among study results (e.g. subgroup analysis, meta-regression).                                                                                                                                                                 | 11                                         |
|                               | 13f    | Describe any sensitivity analyses conducted to assess robustness of the synthesized results.                                                                                                                                                                                                         | 11                                         |

| Section and Topic                              | Item # | Checklist item                                                                                                                                                                                                                                                                       | Location where item is reported                        |
|------------------------------------------------|--------|--------------------------------------------------------------------------------------------------------------------------------------------------------------------------------------------------------------------------------------------------------------------------------------|--------------------------------------------------------|
| Reporting bias assessment                      | 14     | Describe any methods used to assess risk of bias due to missing results in a synthesis (arising from reporting biases).                                                                                                                                                              | 11                                                     |
| Certainty assessment                           | 15     | Describe any methods used to assess certainty (or confidence) in the body of evidence for an outcome.                                                                                                                                                                                | 12                                                     |
| <b>RESULTS</b>                                 |        |                                                                                                                                                                                                                                                                                      |                                                        |
| Study selection                                | 16a    | Describe the results of the search and selection process, from the number of records identified in the search to the number of studies included in the review, ideally using a flow diagram.                                                                                         | 13 and 14, and Fig. 1                                  |
|                                                | 16b    | Cite studies that might appear to meet the inclusion criteria, but which were excluded, and explain why they were excluded.                                                                                                                                                          | eTable 6                                               |
| Study characteristics                          | 17     | Cite each included study and present its characteristics.                                                                                                                                                                                                                            | 13, Table 1, and eTable 8 and 9                        |
| Risk of bias in studies                        | 18     | Present assessments of risk of bias for each included study.                                                                                                                                                                                                                         | eTable 10                                              |
| Results of individual studies                  | 19     | For all outcomes, present, for each study: (a) summary statistics for each group (where appropriate) and (b) an effect estimate and its precision (e.g. confidence/credible interval), ideally using structured tables or plots.                                                     | Figures 3 and 4, and eFigures                          |
| Results of syntheses                           | 20a    | For each synthesis, briefly summarise the characteristics and risk of bias among contributing studies.                                                                                                                                                                               | 14, Table 2, and eTable 12                             |
|                                                | 20b    | Present results of all statistical syntheses conducted. If meta-analysis was done, present for each the summary estimate and its precision (e.g. confidence/credible interval) and measures of statistical heterogeneity. If comparing groups, describe the direction of the effect. | 14 and 15, Table 2, Figures 3 and 4, and eFigures 1-21 |
|                                                | 20c    | Present results of all investigations of possible causes of heterogeneity among study results.                                                                                                                                                                                       | 15, and eFigures 1-21                                  |
|                                                | 20d    | Present results of all sensitivity analyses conducted to assess the robustness of the synthesized results.                                                                                                                                                                           | 15, and eFigures                                       |
| Reporting biases                               | 21     | Present assessments of risk of bias due to missing results (arising from reporting biases) for each synthesis assessed.                                                                                                                                                              | eFigure 22                                             |
| Certainty of evidence                          | 22     | Present assessments of certainty (or confidence) in the body of evidence for each outcome assessed.                                                                                                                                                                                  | eTable 10                                              |
| <b>DISCUSSION</b>                              |        |                                                                                                                                                                                                                                                                                      |                                                        |
| Discussion                                     | 23a    | Provide a general interpretation of the results in the context of other evidence.                                                                                                                                                                                                    | 15 and 16                                              |
|                                                | 23b    | Discuss any limitations of the evidence included in the review.                                                                                                                                                                                                                      | 17 and 18                                              |
|                                                | 23c    | Discuss any limitations of the review processes used.                                                                                                                                                                                                                                | 18                                                     |
|                                                | 23d    | Discuss implications of the results for practice, policy, and future research.                                                                                                                                                                                                       | 18 and 19                                              |
| <b>OTHER INFORMATION</b>                       |        |                                                                                                                                                                                                                                                                                      |                                                        |
| Registration and protocol                      | 24a    | Provide registration information for the review, including register name and registration number, or state that the review was not registered.                                                                                                                                       | 8                                                      |
|                                                | 24b    | Indicate where the review protocol can be accessed, or state that a protocol was not prepared.                                                                                                                                                                                       | 8                                                      |
|                                                | 24c    | Describe and explain any amendments to information provided at registration or in the protocol.                                                                                                                                                                                      | eTable 4                                               |
| Support                                        | 25     | Describe sources of financial or non-financial support for the review, and the role of the funders or sponsors in the review.                                                                                                                                                        | 19 and 20                                              |
| Competing interests                            | 26     | Declare any competing interests of review authors.                                                                                                                                                                                                                                   | 20 (electronic forms)                                  |
| Availability of data, code and other materials | 27     | Report which of the following are publicly available and where they can be found: template data collection forms; data extracted from included studies; data used for all analyses; analytic code; any other materials used in the review.                                           | 12                                                     |

**eTable 2. MOOSE checklist.**

| Section/Topic                               | MOOSE checklist Item(s)                                                                                                                                                                                                                                                                                                                                                                                                                                                                                                                                                                                                                                                                                                                                                                                                                                                                                                            | Reported on Page #                                                      |
|---------------------------------------------|------------------------------------------------------------------------------------------------------------------------------------------------------------------------------------------------------------------------------------------------------------------------------------------------------------------------------------------------------------------------------------------------------------------------------------------------------------------------------------------------------------------------------------------------------------------------------------------------------------------------------------------------------------------------------------------------------------------------------------------------------------------------------------------------------------------------------------------------------------------------------------------------------------------------------------|-------------------------------------------------------------------------|
| <b>BACKGROUND</b>                           |                                                                                                                                                                                                                                                                                                                                                                                                                                                                                                                                                                                                                                                                                                                                                                                                                                                                                                                                    |                                                                         |
| Reporting of background should include      | Problem definition. Hypothesis statement. Description of study outcome(s). Type of exposure or intervention used. Type of study designs used. Study population.                                                                                                                                                                                                                                                                                                                                                                                                                                                                                                                                                                                                                                                                                                                                                                    | 7                                                                       |
| <b>SEARCH</b>                               |                                                                                                                                                                                                                                                                                                                                                                                                                                                                                                                                                                                                                                                                                                                                                                                                                                                                                                                                    |                                                                         |
| Reporting of search strategy should include | Qualifications of searchers (eg, librarians and investigators). Search strategy, including time period included in the synthesis and keywords. Effort to include all available studies, including contact with authors. Databases and registries searched. Search software used, name and version, including special features used (eg, explosion). Use of hand searching (eg, reference lists of obtained articles). List of citations located and those excluded, including justification. Method of addressing articles published in languages other than English. Method of handling abstracts and unpublished studies. Description of any contact with authors.                                                                                                                                                                                                                                                               | 9, and eTable 5                                                         |
| <b>METHODS</b>                              |                                                                                                                                                                                                                                                                                                                                                                                                                                                                                                                                                                                                                                                                                                                                                                                                                                                                                                                                    |                                                                         |
| Reporting of methods should include         | Description of relevance or appropriateness of studies assembled for assessing the hypothesis to be tested. Rationale for the selection and coding of data (eg, sound clinical principles or convenience). Documentation of how data were classified and coded (eg, multiple raters, blinding, and interrater reliability). Assessment of confounding (eg, comparability of cases and controls in studies where appropriate). Assessment of study quality, including blinding of quality assessors; stratification or regression on possible predictors of study results. Assessment of heterogeneity. Description of statistical methods (eg, complete description of fixed or random effects models, justification of whether the chosen models account for predictors of study results, dose-response models, or cumulative meta-analysis) in sufficient detail to be replicated. Provision of appropriate tables and graphics. | 8-12                                                                    |
| <b>RESULTS</b>                              |                                                                                                                                                                                                                                                                                                                                                                                                                                                                                                                                                                                                                                                                                                                                                                                                                                                                                                                                    |                                                                         |
| Reporting of results should include         | Graphic summarizing individual study estimates and overall estimate. Table giving descriptive information for each study included. Results of sensitivity testing (eg, subgroup analysis). Indication of statistical uncertainty of findings.                                                                                                                                                                                                                                                                                                                                                                                                                                                                                                                                                                                                                                                                                      | 12-15, Tables 1 and 2, Figures 2-4, and eTables 8-11, and eFigures 1-22 |
| <b>DISCUSSION</b>                           |                                                                                                                                                                                                                                                                                                                                                                                                                                                                                                                                                                                                                                                                                                                                                                                                                                                                                                                                    |                                                                         |
| Reporting of discussion should include      | Quantitative assessment of bias (eg, publication bias). Justification for exclusion (eg, exclusion of non-English-language citations). Assessment of quality of included studies.                                                                                                                                                                                                                                                                                                                                                                                                                                                                                                                                                                                                                                                                                                                                                  | 15-19                                                                   |
| <b>CONCLUSIONS</b>                          |                                                                                                                                                                                                                                                                                                                                                                                                                                                                                                                                                                                                                                                                                                                                                                                                                                                                                                                                    |                                                                         |
| Reporting of conclusions should include     | Consideration of alternative explanations for observed results. Generalization of the conclusions (ie, appropriate for the data presented and within the domain of the literature review). Guidelines for future research. Disclosure of funding source.                                                                                                                                                                                                                                                                                                                                                                                                                                                                                                                                                                                                                                                                           | 19, 20                                                                  |

Stroup DF, Berlin JA, Morton SC, Olkin I, Williamson GD, Rennie D, Moher D, Becker BJ, Sipe TA, Thacker SB. Meta-analysis of observational studies in epidemiology: a proposal for reporting. Meta-analysis Of Observational Studies in Epidemiology (MOOSE) group. *JAMA*. 2000 Apr 19;283(15):2008-12. Review. PubMed PMID: 10789670

**eTable 3. Coding and classification of causes of death.**

| Causes of death                                          | ICD-10 code | ICD-9 code             | ICD-8 code       |
|----------------------------------------------------------|-------------|------------------------|------------------|
| All causes of death                                      | A00-Y98     | 001-E999               | 000-E999         |
| Infectious and parasitic diseases                        | A00-B99     | 001-033,34-134,136-139 | 000-033, 34-139  |
| Neoplasms                                                | C00-D48     | 140-175, 179-239       | 140-239          |
| Diseases of the blood and blood-forming organs           | D50-D89     | 279-289                | 135,280-289      |
| Endocrine, nutritional and metabolic diseases            | E00-E90     | 240-278                | 240-279          |
| Mental and behavioural disorders                         | F00-F99     | 290-319                | 290-315          |
| Diseases of the nervous system                           | G00-H93     | 320-389                | 320-389          |
| Diseases of the circulatory system                       | I00-I99     | 390-459                | 390-4358         |
| Diseases of the respiratory system                       | J00-J98     | 460-519                | 460-519          |
| Diseases of the digestive system                         | K00-K92     | 520-579                | 520-543, 550-577 |
| Diseases of the skin and subcutaneous tissue             | L00-L99     | 680-709                | 680-709          |
| Diseases of the musculoskeletal system/connective tissue | M00-M99     | 710-739                | 710-738          |
| Diseases of the genitourinary system                     | N00-N98     | 580-629                | 580-629          |
| Complications of pregnancy, childbirth and puerperium    | O00-O99     | 630-676                | 630-678          |
| Certain conditions originating in the perinatal period   | P00-P96     | 760-779                | 760-778          |
| Congenital malformations and chromosomal abnormalities   | Q00-Q99     | 740-759                | 740-759          |
| Symptoms, signs, ill-defined causes                      | R00-R99     | 780-799                | 780-796          |
| External causes of mortality                             | V01-Y98     | E800-E999              | E800-E999        |

#### eTable 4. Methods clarifications/modifications from the protocol

The protocol for this meta-analysis has been registered in PROSPERO (No. CRD42017059955), and published in the open-access journal *Systematic Reviews*, available at: <https://systematicreviewsjournal.biomedcentral.com/articles/10.1186/s13643-017-0581-9>

##### **Clarification 1: Additional analyses**

Page 4 of the published protocol: *"If sufficient studies are identified, we will present subgroup analyses to attempt to explain any potential observed between-study heterogeneity. The potential moderators (covariates) considered will be gender (male or female), diagnostic criteria used (e.g., DSM or ICD and their versions), age group at first diagnosis (children and adolescents [ $< 18$  years old] versus adults [ $\geq 18$  years old]), ethnicity (e.g., white or non-white), number of comorbidities (e.g., 0, 1, 2, or  $\geq 3$ ), medical or neuropsychiatric comorbidity (e.g., presence or absence of a comorbid disorder with ASD or ADHD), index subjects (patients, parents of patients, or siblings of patients), country or geographic region, cohort/sample size ( $< 500$ , 500–1000, or  $> 1000$  participants), setting (mixed, inpatient, outpatient, or community/general population), population-based (yes or no), follow-up period (0–1,  $> 1$ –5, or  $> 5$  years), year of publication as a proxy of changes in clinical practice over time (before 2000 or in 2000 and after), study quality (low or high-moderate quality), and effect measure adjusted for potential confounders (age, sex, or other)."*

Clarification: Pre-planned subgroup analyses (such as diagnostic criteria, ethnicity, index subjects, country or geographic region, population-based(Y/N) and year of publication) could not be carried out for pooled analyses as there were not enough data for establishing well-balanced subgroups. For the primary outcome of all-cause mortality among ASD people, we conducted the following pre-planned (exploratory) subgroup analyses: number of comorbidities, age group at first diagnosis, cohort/sample size, setting, follow-up period, study quality and adjustment for potential confounders. For the primary outcome of all-cause mortality among ASD people, we conducted the following pre-planned (exploratory) subgroup analyses: number of comorbidities.

Page 4 of the published protocol: *"To further assess the consistency of evidence over time, we will perform cumulative meta-analysis in the order of publication year (...)"*.

Clarification: Given the number of individual study estimates available per outcome, cumulative meta-analysis was considered not feasible.

##### **Clarification 2: Additional analysis**

Page 5 of the published protocol: *"Small study effects will be investigated by visual inspection of funnel plots (where appropriate) and with Egger's test and Begg's test, with the results considered to indicate potential small study effects when  $P < 0.10$ ."*

Clarification: Given the number of individual study estimates available per outcome (less than 10 studies), small study effects/publication bias assessment (e.g. funnel plots, Begg and Egger test) was considered not feasible.

We only assessed small study effects/publication bias using for the primary outcome of all-cause mortality in ASD people (12 studies): Begg test ( $P = 0.681$ ), and Egger test ( $P = 0.248$ ). See funnel plot in eFig16.

## eTable 5. Search strategy.

eTable 5a. Key terms for PubMed/MEDLINE search.

| Search | Query                                                                                                                                                                                                                                 | Items       |
|--------|---------------------------------------------------------------------------------------------------------------------------------------------------------------------------------------------------------------------------------------|-------------|
| #1     | ((("Autistic Disorder"[Mesh] AND "Autism Spectrum Disorder"[Mesh]) OR "Asperger Syndrome"[Mesh]) OR "Attention Deficit Disorder with Hyperactivity"[Mesh]) OR "Child Development Disorders, Pervasive"[Mesh]) OR "Hyperkinesia"[Mesh] | 69199       |
| #2     | autism OR autistic OR pervasive developmental disorder* OR Asperger OR attention deficit disorder with hyperactivity OR attention deficit/hyperactivity disorder OR adhd OR inattent* OR impulsivity OR hyperkinesia OR hyperkinetic* | 169702      |
| #3     | epidemiology OR epidemiologic* OR cohort stud* OR longitudinal stud* OR case-control stud*                                                                                                                                            | 4651206     |
| #4     | mortality OR death* OR survival* OR fatal*                                                                                                                                                                                            | 2831878     |
| #5     | #1 OR #2                                                                                                                                                                                                                              | 170011      |
| #6     | #3 AND #4 AND #5                                                                                                                                                                                                                      | <b>1636</b> |

eTable 5b. Key terms for SCOPUS search.

| Search | Query                                                                                                                                                                                                                                                                                                                                                                                                                                                                                                                                                                                                                                                                                                                                                                                                                                                                                                                                                       | Items      |
|--------|-------------------------------------------------------------------------------------------------------------------------------------------------------------------------------------------------------------------------------------------------------------------------------------------------------------------------------------------------------------------------------------------------------------------------------------------------------------------------------------------------------------------------------------------------------------------------------------------------------------------------------------------------------------------------------------------------------------------------------------------------------------------------------------------------------------------------------------------------------------------------------------------------------------------------------------------------------------|------------|
| #1     | TITLE-ABS-KEY ( autism* OR autistic* )                                                                                                                                                                                                                                                                                                                                                                                                                                                                                                                                                                                                                                                                                                                                                                                                                                                                                                                      | 89961      |
| #2     | TITLE-ABS-KEY ( "pervasive development* disorder*" )                                                                                                                                                                                                                                                                                                                                                                                                                                                                                                                                                                                                                                                                                                                                                                                                                                                                                                        | 3901       |
| #3     | TITLE-ABS-KEY ( impulsivity )                                                                                                                                                                                                                                                                                                                                                                                                                                                                                                                                                                                                                                                                                                                                                                                                                                                                                                                               | 18325      |
| #4     | TITLE-ABS-KEY ( inattent* )                                                                                                                                                                                                                                                                                                                                                                                                                                                                                                                                                                                                                                                                                                                                                                                                                                                                                                                                 | 12688      |
| #5     | TITLE-ABS-KEY ( hyperkine* )                                                                                                                                                                                                                                                                                                                                                                                                                                                                                                                                                                                                                                                                                                                                                                                                                                                                                                                                | 10970      |
| #6     | TITLE-ABS-KEY ( asperger )                                                                                                                                                                                                                                                                                                                                                                                                                                                                                                                                                                                                                                                                                                                                                                                                                                                                                                                                  | 6277       |
| #7     | ( TITLE-ABS-KEY ( "attention deficit and hyperactivity disorder*" OR "attention deficit disorder* and hyperactivity" OR "attention deficit disorder* hyperactivity" OR "attention deficit disorder* with hyperactivity" OR "attention deficit hyperactivity disorder*" ) OR TITLE-ABS-KEY ( "attention deficit hyperactivity" OR "attention deficit with hyperactivity disorder*" OR "deficit hyperactivity disorder*" OR adhd OR ( "attention deficit" AND "Hyperactivity disorder*" ) ) )                                                                                                                                                                                                                                                                                                                                                                                                                                                                 | 50857      |
| #8     | ( TITLE-ABS-KEY ( autism* OR autistic* ) ) OR ( TITLE-ABS-KEY ( "pervasive development* disorder*" ) ) OR ( TITLE-ABS-KEY ( impulsivity ) ) OR ( TITLE-ABS-KEY ( inattent* ) ) OR ( TITLE-ABS-KEY ( hyperkine* ) ) OR ( TITLE-ABS-KEY ( asperger ) ) OR ( ( TITLE-ABS-KEY ( "attention deficit and hyperactivity disorder*" OR "attention deficit disorder* and hyperactivity" OR "attention deficit disorder* hyperactivity" OR "attention deficit disorder* with hyperactivity" OR "attention deficit hyperactivity disorder*" ) OR TITLE-ABS-KEY ( "attention deficit hyperactivity" OR "attention deficit with hyperactivity disorder*" OR "deficit hyperactivity disorder*" OR adhd OR ( "attention deficit" AND "Hyperactivity disorder*" ) ) ) )                                                                                                                                                                                                     | 166989     |
| #9     | TITLE-ABS-KEY ( epidemiology OR epidemiologic* OR "cohort stud*" OR "longitudinal stud*" OR "case-control stud*" )                                                                                                                                                                                                                                                                                                                                                                                                                                                                                                                                                                                                                                                                                                                                                                                                                                          | 1689432    |
| #10    | TITLE-ABS-KEY ( mortality OR death* OR survival* OR fatal* )                                                                                                                                                                                                                                                                                                                                                                                                                                                                                                                                                                                                                                                                                                                                                                                                                                                                                                | 3929799    |
| #11    | ( ( TITLE-ABS-KEY ( autism* OR autistic* ) ) OR ( TITLE-ABS-KEY ( "pervasive development* disorder*" ) ) OR ( TITLE-ABS-KEY ( impulsivity ) ) OR ( TITLE-ABS-KEY ( inattent* ) ) OR ( TITLE-ABS-KEY ( hyperkine* ) ) OR ( TITLE-ABS-KEY ( asperger ) ) OR ( ( TITLE-ABS-KEY ( "attention deficit and hyperactivity disorder*" OR "attention deficit disorder* and hyperactivity" OR "attention deficit disorder* hyperactivity" OR "attention deficit disorder* with hyperactivity" OR "attention deficit hyperactivity disorder*" ) OR TITLE-ABS-KEY ( "attention deficit hyperactivity" OR "attention deficit with hyperactivity disorder*" OR "deficit hyperactivity disorder*" OR adhd OR ( "attention deficit" AND "Hyperactivity disorder*" ) ) ) ) ) AND ( TITLE-ABS-KEY ( epidemiology OR epidemiologic* OR "cohort stud*" OR "longitudinal stud*" OR "case-control stud*" ) ) AND ( TITLE-ABS-KEY ( mortality OR death* OR survival* OR fatal* ) ) | <b>634</b> |

eTable 5c. Key terms for Embase search.

| Search | Query                                                                                                                                                                                                                                                                                                                                                                                                                                             | Items       |
|--------|---------------------------------------------------------------------------------------------------------------------------------------------------------------------------------------------------------------------------------------------------------------------------------------------------------------------------------------------------------------------------------------------------------------------------------------------------|-------------|
| #1     | autism* OR autistic*                                                                                                                                                                                                                                                                                                                                                                                                                              | 88351       |
| #2     | 'pervasive development* disorder*'                                                                                                                                                                                                                                                                                                                                                                                                                | 3923        |
| #3     | impulsivity                                                                                                                                                                                                                                                                                                                                                                                                                                       | 19121       |
| #4     | inattent*                                                                                                                                                                                                                                                                                                                                                                                                                                         | 10970       |
| #5     | hyperkine*                                                                                                                                                                                                                                                                                                                                                                                                                                        | 10651       |
| #6     | asperger                                                                                                                                                                                                                                                                                                                                                                                                                                          | 5864        |
| #7     | 'attention deficit and hyperactivity disorder*' OR 'attention deficit disorder* and hyperactivity' OR 'attention deficit disorder* hyperactivity' OR 'attention deficit disorder* with hyperactivity' OR 'attention deficit hyperactivity disorder*' OR 'attention deficit hyperactivity' OR 'attention deficit with hyperactivity disorder*' OR 'deficit hyperactivity disorder*' OR adhd OR ('attention deficit' AND 'hyperactivity disorder*') | 48651       |
| #8     | #1 OR #2 OR #3 OR #4 OR #5 OR #6 OR #7                                                                                                                                                                                                                                                                                                                                                                                                            | 159745      |
| #9     | epidemiology OR epidemiologic* OR 'cohort stud*' OR 'longitudinal stud*' OR 'case-control stud*'                                                                                                                                                                                                                                                                                                                                                  | 27222542    |
| #10    | mortality OR death* OR survival* OR fatal*                                                                                                                                                                                                                                                                                                                                                                                                        | 4116473     |
| #11    | #8 AND #9 AND #10                                                                                                                                                                                                                                                                                                                                                                                                                                 | <b>1087</b> |



eTable 5d. Key terms for **Web of Science** Core collection search.

| Search | Query                                                                                                                                                                                                                                                                                                                                                                                                                                                       | Items      |
|--------|-------------------------------------------------------------------------------------------------------------------------------------------------------------------------------------------------------------------------------------------------------------------------------------------------------------------------------------------------------------------------------------------------------------------------------------------------------------|------------|
| #1     | TOPIC: (Autism* or Autistic*)                                                                                                                                                                                                                                                                                                                                                                                                                               | 72294      |
| #2     | TOPIC: ("pervasive development* disorder**")                                                                                                                                                                                                                                                                                                                                                                                                                | 4599       |
| #3     | TOPIC: (impulsivity)                                                                                                                                                                                                                                                                                                                                                                                                                                        | 19643      |
| #4     | TOPIC: (Inattent*)                                                                                                                                                                                                                                                                                                                                                                                                                                          | 9758       |
| #5     | TOPIC: (hyperkine*)                                                                                                                                                                                                                                                                                                                                                                                                                                         | 3953       |
| #6     | TOPIC: (Asperger)                                                                                                                                                                                                                                                                                                                                                                                                                                           | 6446       |
| #7     | TOPIC: ("attention deficit and hyperactivity disorder*" or "attention deficit disorder* and hyperactivity" or "attention deficit disorder* hyperactivity" or "attention deficit disorder* with hyperactivity" or "attention deficit hyperactivity disorder*" or "attention deficit hyperactivity" or "attention deficit with hyperactivity disorder*" or "deficit hyperactivity disorder*" or adhd or ("attention deficit" and "Hyperactivity disorder**")) | 49034      |
| #8     | #7 OR #6 OR #5 OR #4 OR #3 OR #2 OR #1                                                                                                                                                                                                                                                                                                                                                                                                                      | 144324     |
| #9     | TOPIC: (epidemiology or epidemiologic* or "cohort stud*" or "longitudinal stud*" or "case-control stud**")                                                                                                                                                                                                                                                                                                                                                  | 903816     |
| #10    | TOPIC: (mortality or death* or survival* or fatal*)                                                                                                                                                                                                                                                                                                                                                                                                         | 2731829    |
| #11    | #10 AND #9 AND #8                                                                                                                                                                                                                                                                                                                                                                                                                                           | <b>443</b> |

eTable 5e. Key terms for **PsycINFO** search.

| Search | Query                                                                                                                                                                                                                                                                                                                                                                                                                                              | Items      |
|--------|----------------------------------------------------------------------------------------------------------------------------------------------------------------------------------------------------------------------------------------------------------------------------------------------------------------------------------------------------------------------------------------------------------------------------------------------------|------------|
| S1     | Autism* or Autistic*                                                                                                                                                                                                                                                                                                                                                                                                                               | 83493      |
| S2     | "pervasive development* disorder**"                                                                                                                                                                                                                                                                                                                                                                                                                | 3500       |
| S3     | impulsivity                                                                                                                                                                                                                                                                                                                                                                                                                                        | 17648      |
| S4     | Inattent*                                                                                                                                                                                                                                                                                                                                                                                                                                          | 8833       |
| S5     | hyperkine*                                                                                                                                                                                                                                                                                                                                                                                                                                         | 7730       |
| S6     | Asperger                                                                                                                                                                                                                                                                                                                                                                                                                                           | 4646       |
| S7     | "attention deficit and hyperactivity disorder*" or "attention deficit disorder* and hyperactivity" or "attention deficit disorder* hyperactivity" or "attention deficit disorder* with hyperactivity" or "attention deficit hyperactivity disorder*" or "attention deficit hyperactivity" or "attention deficit with hyperactivity disorder*" or "deficit hyperactivity disorder*" or adhd or ("attention deficit" and "Hyperactivity disorder**") | 40328      |
| S8     | S1 OR S2 OR S3 OR S4 OR S5 OR S6 OR S7                                                                                                                                                                                                                                                                                                                                                                                                             | 128749     |
| S9     | epidemiology or epidemiologic* or "cohort stud*" or "longitudinal stud*" or "case-control stud**"                                                                                                                                                                                                                                                                                                                                                  | 382731     |
| S10    | mortality or death* or survival* or fatal*                                                                                                                                                                                                                                                                                                                                                                                                         | 181733     |
| S11    | S8 AND S9 AND S10                                                                                                                                                                                                                                                                                                                                                                                                                                  | <b>400</b> |

**eTable 6. List of excluded studies.**

| Reference                                                                                                                                                                                                                                                                                                                                                                                         | Cause                                   |
|---------------------------------------------------------------------------------------------------------------------------------------------------------------------------------------------------------------------------------------------------------------------------------------------------------------------------------------------------------------------------------------------------|-----------------------------------------|
| Kanner L. Follow-up study of eleven autistic children originally reported in 1943. <i>J Autism Child Schizophr.</i> 1971 Apr-Jun;1(2):119-45. doi: 10.1007/BF01537953. PMID: 5172388.                                                                                                                                                                                                             | Wrong study design                      |
| Kobayashi R, Murata T, Yoshinaga K. A follow-up study of 201 children with autism in Kyushu and Yamaguchi areas, Japan. <i>J Autism Dev Disord.</i> 1992;22(3):395-411. doi: 10.1007/BF01048242. PMID: 1383189.                                                                                                                                                                                   | Wrong study design                      |
| Brent DA, Johnson B, Bartle S, Bridge J, Rather C, Matta J, Connolly J, Constantine D. Personality disorder, tendency to impulsive violence, and suicidal behavior in adolescents. <i>J Am Acad Child Adolesc Psychiatry.</i> 1993;32(1):69-75. doi: 10.1097/00004583-199301000-00010. PMID: 8428886.                                                                                             | Did not have ADHD/autism as an exposure |
| Boyle CA, Decouflé P, Holmgren P. Contribution of developmental disabilities to childhood mortality in the United States: a multiple-cause-of-death analysis. <i>Paediatr Perinat Epidemiol.</i> 1994;8(4):411-22. doi: 10.1111/j.1365-3016.1994.tb00480.x. PMID: 7532859.                                                                                                                        | Data not abstractable                   |
| Ballaban-Gil K, Rapin I, Tuchman R, Shinnar S. Longitudinal examination of the behavioral, language, and social changes in a population of adolescents and young adults with autistic disorder. <i>Pediatr Neurol.</i> 1996;15(3):217-23. doi: 10.1016/s0887-8994(96)00219-6. PMID: 8916159.                                                                                                      | Wrong study design                      |
| Thomsen PH. A 22- to 25-year follow-up study of former child psychiatric patients: a register-based investigation of the course of psychiatric disorder and mortality in 546 Danish child psychiatric patients. <i>Acta Psychiatr Scand.</i> 1996;94(6):397-403. doi: 10.1111/j.1600-0447.1996.tb09880.x. PMID: 9020989.                                                                          | Did not have ADHD/autism as an exposure |
| Daley KC. Updates on attention deficit hyperactivity disorder, child abuse and neglect, and sudden infant death syndrome. <i>Curr Opin Pediatr.</i> 2003;15(2):216-25. doi: 10.1097/00008480-200304000-00014. PMID: 12640282.                                                                                                                                                                     | Wrong study design                      |
| Cohen A, Asor E, Tirosh E. Predictive factors of early mortality in children with developmental disabilities: a case-comparison analysis. <i>J Child Neurol.</i> 2008 May;23(5):536-42. doi: 10.1177/0883073807309795. PMID: 18184935.                                                                                                                                                            | Wrong study design                      |
| Sourander A, Klomek AB, Niemelä S, Haavisto A, Gyllenberg D, Helenius H, Sillanmäki L, Ristkari T, Kumpulainen K, Tamminen T, Moilanen I, Piha J, Almqvist F, Gould MS. Childhood predictors of completed and severe suicide attempts: findings from the Finnish 1981 Birth Cohort Study. <i>Arch Gen Psychiatry.</i> 2009;66(4):398-406. doi: 10.1001/archgenpsychiatry.2009.21. PMID: 19349309. | Did not have ADHD/autism as an exposure |
| McCarthy S, Cranswick N, Potts L, Taylor E, Wong IC. Mortality associated with attention-deficit hyperactivity disorder (ADHD) drug treatment: a retrospective cohort study of children, adolescents and young adults using the general practice research database. <i>Drug Saf.</i> 2009;32(11):1089-96. doi: 10.2165/11317630-000000000-00000. PMID: 19810780.                                  | Did not have ADHD/autism as an exposure |
| Bussing R, Mason DM, Bell L, Porter P, Garvan C. Adolescent outcomes of childhood attention-deficit/hyperactivity disorder in a diverse community sample. <i>J Am Acad Child Adolesc Psychiatry.</i> 2010;49(6):595-605. doi: 10.1016/j.jaac.2010.03.006. PMID: 20494269.                                                                                                                         | Did not have mortality as an outcome    |
| Chronis-Tuscano A, Molina BS, Pelham WE, Applegate B, Dahlke A, Overmyer M, Lahey BB. Very early predictors of adolescent depression and suicide attempts in children with attention-deficit/hyperactivity disorder. <i>Arch Gen Psychiatry.</i> 2010 Oct;67(10):1044-51. doi: 10.1001/archgenpsychiatry.2010.127. PMID: 20921120; PMCID: PMC3382065.                                             | Did not have mortality as an outcome    |
| Pickett J, Xiu E, Tuchman R, Dawson G, Lajonchere C. Mortality in individuals with autism, with and without epilepsy. <i>J Child Neurol.</i> 2011;26(8):932-9. doi: 10.1177/0883073811402203. PMID: 21471551.                                                                                                                                                                                     | Wrong study design                      |
| Schelleman H, Bilker WB, Strom BL, Kimmel SE, Newcomb C, Guevara JP, Daniel GW, Cziraky MJ, Hennessy S. Cardiovascular events and death in children exposed and unexposed to ADHD agents. <i>Pediatrics.</i> 2011 Jun;127(6):1102-10. doi: 10.1542/peds.2010-3371. PMID: 21576311.                                                                                                                | Did not have ADHD/autism as an exposure |
| Schelleman H, Bilker WB, Kimmel SE, Daniel GW, Newcomb C, Guevara JP, Cziraky MJ, Strom BL, Hennessy S. Methylphenidate and risk of serious cardiovascular events in adults. <i>Am J Psychiatry.</i> 2012 Feb;169(2):178-85. doi: 10.1176/appi.ajp.2011.11010125. PMID: 22318795.                                                                                                                 | Did not have ADHD/autism as an exposure |
| Kang JH, Lin HC, Chung SD. Attention-deficit/hyperactivity disorder increased the risk of injury: a population-based follow-up study. <i>Acta Paediatr.</i> 2013 Jun;102(6):640-3. doi: 10.1111/apa.12213. PMID: 23647526.                                                                                                                                                                        | Did not have mortality as an outcome    |
| Khan A, Faucett J, Morrison S, Brown WA. Comparative mortality risk in adult patients with schizophrenia, depression, bipolar disorder, anxiety disorders, and attention-deficit/hyperactivity disorder participating in psychopharmacology clinical trials. <i>JAMA Psychiatry.</i> 2013;70(10):1091-9. doi: 10.1001/jamapsychiatry.2013.149. PMID: 23986353.                                    | Wrong study design                      |
| Chang Z, Lichtenstein P, D'Onofrio BM, Sjölander A, Larsson H. Serious transport accidents in adults with attention-deficit/hyperactivity disorder and the effect of medication: a population-based study. <i>JAMA Psychiatry.</i> 2014 Mar;71(3):319-25. doi: 10.1001/jamapsychiatry.2013.4174. PMID: 24477798.                                                                                  | Data not abstractable                   |
| Chang Z, Quinn PD, Hur K, Gibbons RD, Sjölander A, Larsson H, D'Onofrio BM. Association Between Medication Use for Attention-Deficit/Hyperactivity Disorder and Risk of Motor Vehicle Crashes. <i>JAMA Psychiatry.</i> 2017;74(6):597-603. doi: 10.1001/jamapsychiatry.2017.0659. PMID: 28492937.                                                                                                 | Did not have mortality as an outcome    |
| Acar E, Dursun OB, Esin İS, Öğütü H, Özcan H, Mutlu M. Unintentional Injuries in Preschool Age Children: Is There a Correlation With Parenting Style and Parental Attention Deficit and Hyperactivity Symptoms. <i>Medicine (Baltimore).</i> 2015;94(32):e1378. doi: 10.1097/MD.0000000000001378. PMID: 26266395; PMCID: PMC4616671.                                                              | Did not have mortality as an outcome    |
| Chiang HL, Liu CJ, Hu YW, Chen SC, Hu LY, Shen CC, Yeh CM, Chen TJ, Gau SS. Risk of cancer in children, adolescents, and young adults with autistic disorder. <i>J Pediatr.</i> 2015 Feb;166(2):418-23.e1. doi: 10.1016/j.jpeds.2014.10.029. PMID: 25453246.                                                                                                                                      | Data not abstractable                   |
| Alasaarela L, Hakko H, Riala K, Riipinen P. Association of Self-reported Impulsivity to Nonsuicidal Self-Injury, Suicidality, and Mortality in Adolescent Psychiatric Inpatients. <i>J Nerv Ment Dis.</i> 2017;205(5):340-345. doi: 10.1097/NMD.0000000000000655. PMID: 28141633.                                                                                                                 | Wrong study design                      |
| Curry AE, Metzger KB, Pfeiffer MR, Elliott MR, Winston FK, Power TJ. Motor Vehicle Crash Risk Among Adolescents and Young Adults With Attention-Deficit/Hyperactivity Disorder. <i>JAMA Pediatr.</i> 2017;171(8):756-763. doi: 10.1001/jamapediatrics.2017.0910. PMID: 28604931.                                                                                                                  | Did not have mortality as an outcome    |
| Bourke J, Nembhard WN, Wong K, Leonard H. Twenty-Five Year Survival of Children with Intellectual Disability in Western Australia. <i>J Pediatr.</i> 2017;188:232-239.e2. doi: 10.1016/j.jpeds.2017.06.008. PMID: 28705655.                                                                                                                                                                       | Did not have ADHD/autism as an exposure |

|                                                                                                                                                                                                                                                                                                                                                                  |                                         |
|------------------------------------------------------------------------------------------------------------------------------------------------------------------------------------------------------------------------------------------------------------------------------------------------------------------------------------------------------------------|-----------------------------------------|
| Franklin RC, Pearn JH, Peden AE. Drowning fatalities in childhood: the role of pre-existing medical conditions. <i>Arch Dis Child</i> . 2017;102(10):888-893. doi: 10.1136/archdischild-2017-312684. Epub 2017 May 8. PMID: 28483756.                                                                                                                            | Wrong study design                      |
| Laukkala T, Bor R, Budowle B, Sajantila A, Navathe P, Sainio M, Vuorio A. Attention-Deficit/Hyperactivity Disorder and Fatal Accidents in Aviation Medicine. <i>Aerosp Med Hum Perform</i> . 2017;88(9):871-875. doi: 10.3357/AMHP.4919.2017. PMID: 28818147.                                                                                                    | Wrong study design                      |
| Meier SM, Dalsgaard S, Mortensen PB, Leckman JF, Plessen KJ. Mortality risk in a nationwide cohort of individuals with tic disorders and with tourette syndrome. <i>Mov Disord</i> . 2017 Apr;32(4):605-609. doi: 10.1002/mds.26939. Epub 2017 Mar 24. PMID: 28339122.                                                                                           | Did not have ADHD/autism as an exposure |
| Ståhlberg O, Boman S, Robertsson C, Kerekes N, Anckarsäter H, Nilsson T. A 3-year follow-up study of Swedish youths committed to juvenile institutions: Frequent occurrence of criminality and health care use regardless of drug abuse. <i>Int J Law Psychiatry</i> . 2017 Jan-Feb;50:52-60. doi: 10.1016/j.ijlp.2016.09.004. Epub 2016 Oct 13. PMID: 27745884. | Wrong study design                      |
| Smith DaWalt L, Hong J, Greenberg JS, Mailick MR. Mortality in individuals with autism spectrum disorder: Predictors over a 20-year period. <i>Autism</i> . 2019;23(7):1732-1739. doi: 10.1177/1362361319827412. Epub 2019 Feb 28. PMID: 30818975.                                                                                                               | Wrong study design                      |
| Anastopoulos AD, DuPaul GJ, Weyandt LL, Morrissey-Kane E, Sommer JL, Rhoads LH, Murphy KR, Gormley MJ, Gudmundsdottir BG. Rates and Patterns of Comorbidity Among First-Year College Students With ADHD. <i>J Clin Child Adolesc Psychol</i> . 2018;47(2):236-247. doi: 10.1080/15374416.2015.1105137. PMID: 26852645.                                           | Did not have mortality as an outcome    |
| Agnafors S, Torgerson J, Rusner M, Kjellström AN. Injuries in children and adolescents with psychiatric disorders. <i>BMC Public Health</i> . 2020;20(1):1273. doi: 10.1186/s12889-020-09283-3. PMID: 32838787.                                                                                                                                                  | Did not have mortality as an outcome    |
| Chen VC, Chan HL, Wu SI, Lu ML, Dewey ME, Stewart R, Lee CT. Methylphenidate and mortality in children with attention-deficit hyperactivity disorder: population-based cohort study. <i>Br J Psychiatry</i> . 2020 Jul 14:1-9. doi: 10.1192/bjp.2020.129. PMID: 32662370.                                                                                        | Did not have ADHD/autism as an exposure |
| Houghton R, de Vries F, Loss G. Psychostimulants/Atomoxetine and Serious Cardiovascular Events in Children with ADHD or Autism Spectrum Disorder. <i>CNS Drugs</i> . 2020 Jan;34(1):93-101. doi: 10.1007/s40263-019-00686-4. PMID: 31768949.                                                                                                                     | Did not have ADHD/autism as an exposure |
| Peden AE, Willcox-Pidgeon S. Autism spectrum disorder and unintentional fatal drowning of children and adolescents in Australia: an epidemiological analysis. <i>Arch Dis Child</i> . 2020;105(9):869-874. doi: 10.1136/archdischild-2019-318658. PMID: 32169851.                                                                                                | Wrong study design                      |
| Gilmore D, Harris L, Longo A, Hand BN. Health status of Medicare-enrolled autistic older adults with and without co-occurring intellectual disability: An analysis of inpatient and institutional outpatient medical claims. <i>Autism</i> . 2021 Jan;25(1):266-274. doi: 10.1177/1362361320955109. PMID: 32907348.                                              | Did not have mortality as an outcome    |
| Leone M, Kuja-Halkola R, Leval A, D'Onofrio BM, Larsson H, Lichtenstein P, Bergen SE. Association of Youth Depression With Subsequent Somatic Diseases and Premature Death. <i>JAMA Psychiatry</i> . 2021 Mar 1;78(3):302-310. doi: 10.1001/jamapsychiatry.2020.3786. PMID: 33295952.                                                                            | Did not have ADHD/autism as an exposure |
| Risnes K, Bilsteen JF, Brown P, Pulakka A, Andersen AN, Opdahl S, Kajantie E, Sandin S. Mortality Among Young Adults Born Preterm and Early Term in 4 Nordic Nations. <i>JAMA Netw Open</i> . 2021 Jan 4;4(1):e2032779. doi: 10.1001/jamanetworkopen.2020.32779. Erratum in: <i>JAMA Netw Open</i> . 2021 Feb 1;4(2):e210068. PMID: 33416885.                    | Did not have ADHD/autism as an exposure |

**eTable 7. List of studies with authors contacted for additional clarifications or data.**

| Study reference                                                                                                                                                                                                                                                                                               | Contacted author | Number of patients   | Response from authors (Yes/No) | Additional data (Yes/No) |
|---------------------------------------------------------------------------------------------------------------------------------------------------------------------------------------------------------------------------------------------------------------------------------------------------------------|------------------|----------------------|--------------------------------|--------------------------|
| Pickett JA, Paculdo DR, Shavelle RM, Strauss DJ. 1998-2002 Update on "Causes of death in autism". <i>J Autism Dev Disord.</i> 2006;36(2):287-8.                                                                                                                                                               | Pickett, JA      | 13111 ASD patients   | Yes                            | No                       |
| Mouridsen SE, Brønnum-Hansen H, Rich B, Isager T. Mortality and causes of death in autism spectrum disorders: an update. <i>Autism.</i> 2008;12(4):403-14.                                                                                                                                                    | Mouridsen, SE    | 341 ASD patients     | No                             | No                       |
| Gillberg C, Billstedt E, Sundh V, Gillberg IC. Mortality in autism: a prospective longitudinal community-based study. <i>J Autism Dev Disord.</i> 2010;40(3):352-7.                                                                                                                                           | Gillberg, C      | 120 ASD patients     | Yes                            | No                       |
| Bilder D, Botts EL, Smith KR, Pimentel R, Farley M, Viskochil J, McMahon WM, Block H, Ritvo E, Ritvo RA, Coon H. Excess mortality and causes of death in autism spectrum disorders: a follow up of the 1980s Utah/UCLA autism epidemiologic study. <i>J Autism Dev Disord.</i> 2013;43(5):1196-204.           | Bilder, D        | 305 ASD patients     | Yes                            | No                       |
| Chang Z, Lichtenstein P, D'Onofrio BM, Sjölander A, Larsson H. Serious transport accidents in adults with attention-deficit/hyperactivity disorder and the effect of medication: a population-based study. <i>JAMA Psychiatry.</i> 2014;71(3):319-25.                                                         | Chang, Z         | 17408 ADHD patients  | Yes                            | No                       |
| Dalsgaard S, Østergaard SD, Leckman JF, Mortensen PB, Pedersen MG. Mortality in children, adolescents, and adults with attention deficit hyperactivity disorder: a nationwide cohort study. <i>Lancet.</i> 2015 30;385(9983):2190-6.                                                                          | Dalsgaard, S     | 32061 ADHD patients  | Yes                            | Yes                      |
| Hirvikoski T, Mittendorfer-Rutz E, Boman M, Larsson H, Lichtenstein P, Bölte S. Premature mortality in autism spectrum disorder. <i>Br J Psychiatry.</i> 2016;208(3):232-8.                                                                                                                                   | Hirvikoski, T    | 27122 ASD patients   | Yes                            | No                       |
| London AS, Landes SD. Attention Deficit Hyperactivity Disorder and adult mortality. <i>Prev Med.</i> 2016;90:8-10.                                                                                                                                                                                            | London, AS       | 654 ADHD patients    | Yes                            | No                       |
| Chen VC, Chan HL, Wu SI, Lee M, Lu ML, Liang HY, Dewey ME, Stewart R, Lee CT. Attention-Deficit/Hyperactivity Disorder and Mortality Risk in Taiwan. <i>JAMA Netw Open.</i> 2019;2(8):e198714.                                                                                                                | Lee, CT          | 275980 ADHD patients | No                             | No                       |
| Hwang YJ, Srasuebkul P, Foley KR, Arnold S, Trollor JN. Mortality and cause of death of Australians on the autism spectrum. <i>Autism Res.</i> 2019;12(5):806-815.                                                                                                                                            | Hwang, YU        | 35929 ASD patients   | No                             | No                       |
| Sun S, Kuja-Halkola R, Faraone SV, D'Onofrio BM, Dalsgaard S, Chang Z, Larsson H. Association of Psychiatric Comorbidity With the Risk of Premature Death Among Children and Adults With Attention-Deficit/Hyperactivity Disorder. <i>JAMA Psychiatry.</i> 2019 Aug 7. doi: 10.1001/jamapsychiatry.2019.1944. | Sun, S           | 86670 ADHD patients  | Yes                            | Yes                      |
| Smith GS, Fleming M, Kinnear D, Henderson A, Pell JP, Melville C, Cooper SA. Mortality in 787,666 school pupils with and without autism: A cohort study. <i>Autism.</i> 2020 Aug 24;1362361320944037. doi: 10.1177/1362361320944037.                                                                          | Smith, GS        | 9754 ASD patients    | Yes                            | No                       |

**eTable 8. Main characteristics of included studies.**

| Author, year                                                                                               | Study design (country)               | Setting; Coverage           | Study years (Follow-up, y) | No. of Participants                    | Characteristics of Participants by Sex; Age; Race/Ethnicity; Social Status; Comorbidities                                                                                    | No. of Fatal cases | Main outcome(s)                       | Causes of death | Exposure and outcome definitions                                                                                                                                                                                                                                              | Comparator                         | Endpoint Measure | Adjustment for confounding factors |
|------------------------------------------------------------------------------------------------------------|--------------------------------------|-----------------------------|----------------------------|----------------------------------------|------------------------------------------------------------------------------------------------------------------------------------------------------------------------------|--------------------|---------------------------------------|-----------------|-------------------------------------------------------------------------------------------------------------------------------------------------------------------------------------------------------------------------------------------------------------------------------|------------------------------------|------------------|------------------------------------|
| Kuperman et al, <sup>33</sup> 1988                                                                         | Retrospective cohort (United States) | Inpatient; population-based | 1970-1985 (9.1)            | 110 people with ADHD                   | 20.0% female; mean age, 12.3 y (at admission) and 22.1 y (at FU); 97% white; NA; CC (11.5% male; 4.8% female)                                                                | 1                  | Specific cause of death               | Yes             | E: ICD-9 codes 314.x (attention deficit disorder)<br>O: ICD-9 codes E800-E999 (external)                                                                                                                                                                                      | General population                 | SMR              | Age, sex and calendar year         |
| Pickett et al, <sup>13</sup> 2006;<br>Shavelle et al, <sup>34</sup> 2001;<br>Shavelle et al, <sup>35</sup> | Retrospective cohort (United States) | Community; population-based | 1983-1997; 1998-2002 (9.5) | 13111 people with ASD                  | 20.6% female; most aged ≥ 4 y (at first evaluation); 50% white, 16% Hispanic, 13% black, 6% Asian, 15% other; NA; 30% moderate to profound mental retardation, 4.2% seizures | 280                | All-cause and specific cause of death | Yes             | E: ICD-9 codes (autism)<br>O: ICD-9 codes 001-E999 (any cause), 140-239 (neoplasms), 345, 436, 780.3 (seizures), 320-389, excl. 345 (nervous system), 390-459 (circulatory), 460-519 (respiratory), 520-579 (digestive), 740-759 (congenital anomalies), E800-E999 (external) | General population                 | SMR              | Age and sex                        |
| Barkley et al, <sup>36</sup> 2008;<br>Barkley et al, <sup>37</sup> 1990                                    | Retrospective cohort (United States) | Outpatient; health services | 1979-1996 (17 y)           | 158 people with ADHD and their parents | 9% female; aged ≥ 4 y (at first evaluation) and 21 y (at FU); 94% white, 5% black, 1% Hispanic; NA; 43% CC                                                                   | 3                  | All-cause and specific cause of death | Yes             | E: Interview with patient report, DSM-III-R (hyperactivity)<br>O: deaths (any cause, circulatory, external)                                                                                                                                                                   | Participants without hyperactivity | RR               | None                               |
| Mouridsen et al, <sup>38</sup> 2008;<br>Isager et al, <sup>39</sup> 1999                                   | Retrospective cohort (Denmark)       | Inpatient; population-based | 1960-2006 (35.5 y)         | 341 people with ASD                    | 24.9% female; mean age, 7.5 y (at admission) and 43.4 (at FU); NA; NA; NA                                                                                                    | 26                 | All-cause and specific cause of death | Yes             | E: ICD-9, ICD-10 codes (childhood autism, atypical autism, Asperger syndrome, other childhood disintegrative disorders)<br>O: deaths (any cause, infectious, nervous system, circulatory, external)                                                                           | General population                 | SMR              | Age, sex and calendar year         |
| Gillberg et al, <sup>40</sup> 2010                                                                         | Prospective cohort (Sweden)          | Community; population-based | 1962-2008 (33.2 y)         | 120 people with ASD                    | 29.2% female; early childhood (at admission) and mean age 33.2 y (at FU); NA, NA; 52.5% any medical condition, 38.3% epilepsy                                                | 9                  | All-cause and specific cause of death | Yes             | E: DSM-III, DSM-III-R codes (autism, atypical autism)<br>O: deaths (any cause, infectious, neoplasms, nervous system, circulatory, external)                                                                                                                                  | General population                 | SMR              | Age, sex and calendar year         |
| Klein et al, <sup>41</sup> 2012                                                                            | Prospective cohort (United States)   | Community; school-based     | 1970-NA (33 y)             | 207 people with ADHD                   | All male; mean age, 8.3 y (at first evaluation) and 41 y (at FU); 100% white; NA; no CC                                                                                      | 15                 | All-cause of death                    | No              | E: DSM-IV codes (attention deficit hyperactivity disorder, combined type)<br>O: deaths (any cause)                                                                                                                                                                            | Participants without ADHD          | RR               | None                               |
| Barbaresi et al, <sup>42</sup> 2013                                                                        | Prospective cohort (United States)   | Community; population-based | 1976-2009 (NA)             | 367 people with ADHD                   | 28.0% female; mean age, 10.4 y (at diagnosis) and 27.0 y (at FU); 99% white; maternal education, 18% college graduate; 9% not                                                | 7                  | All-cause and specific cause of death | Yes             | E: DSM-IV codes (ADHD)<br>O: deaths (any cause, external)                                                                                                                                                                                                                     | Participants without ADHD          | SMR              | Age and sex                        |

|                                                                      |                                                 |                                                 |                  |                                        |                                                                                                                                                                                                                      |     |                                       |     |                                                                                                                                                                                                               |                                                     |    |                                                                                                         |
|----------------------------------------------------------------------|-------------------------------------------------|-------------------------------------------------|------------------|----------------------------------------|----------------------------------------------------------------------------------------------------------------------------------------------------------------------------------------------------------------------|-----|---------------------------------------|-----|---------------------------------------------------------------------------------------------------------------------------------------------------------------------------------------------------------------|-----------------------------------------------------|----|---------------------------------------------------------------------------------------------------------|
|                                                                      |                                                 |                                                 |                  |                                        | married; 22% substance abuse, 70% any learning disability                                                                                                                                                            |     |                                       |     |                                                                                                                                                                                                               |                                                     |    |                                                                                                         |
| Bilder et al, <sup>14</sup> 2013                                     | Retrospective cohort (United States)            | Community; population-based                     | 1982-2011 (25 y) | 305 people with ASD and their siblings | 25.2% female; mean age, 10.8 y (at diagnosis) and 35.8 (at FU); NA; NA; 42% severe intellectual disability                                                                                                           | 29  | All-cause and specific cause of death | Yes | E: DSM-III-R, DSM-IV codes (ASD)<br>O: ICD-9, ICD-10 codes (infectious, neoplasms, endocrine/metabolic, mental, nervous system, circulatory, respiratory, congenital anomalies, external)                     | General population; Siblings                        | HR | Age, sex, and birth weight                                                                              |
| Fairthorne et al, <sup>43</sup> 2014                                 | Retrospective cohort (Australia)                | Community; population-based                     | 1983-2010 (NA)   | 2041 mothers of children with ASD      | All women; most aged 20-34 y (77%), mean age of death, 42 y; NA; 23% high socioeconomic status; 69% children with intellectual disability                                                                            | 24  | All-cause and specific cause of death | Yes | E: interview with mothers (ASD)<br>O: ICD-9, ICD-10 codes (any cause, neoplasms, circulatory, respiratory, digestive, pregnancy, congenital anomalies, external)                                              | Participants without ASD or intellectual disability | HR | Age                                                                                                     |
| Dalsgaard et al, <sup>16</sup> 2015; Scott et al, <sup>44</sup> 2017 | Retrospective cohort (Denmark)                  | Community; population-based                     | 1981-2013 (32 y) | 32061 people with ADHD                 | 26.4% female; mean age, 12.3 y (at diagnosis); NA; NA; 16.9% ODD/CD, 12.3% SUS                                                                                                                                       | 107 | All-cause and specific cause of death | Yes | E: ICD-8, ICD-10 codes 308.01, F90x or F98.8 (hyperkinetic disorders)<br>O: ICD-8, ICD-10 codes (any cause, natural and unnatural/external)                                                                   | General population                                  | RR | Age, sex, calendar year, parental history of psychiatric disorders, parental educational and employment |
| Koisaari et al, <sup>45</sup> 2015                                   | Prospective cohort (Finland)                    | Community; health services (maternity hospital) | 1971-2004 (40 y) | 122 people with ADHD                   | 29.5% female; aged ≥ 5 y (at first evaluation), mean age 40 y (at FU); NA; NA; NA                                                                                                                                    | 11  | All-cause and specific cause of death | Yes | E: DSM-II codes (hyperkinetic reaction of childhood, minimal brain dysfunction), DSM-IV codes (ADHD)<br>O: deaths (any cause, nervous system, circulatory, endocrine, digestive, external)                    | Participants without ADHD                           | RR | None                                                                                                    |
| Hetchman et al, <sup>46</sup> 2016                                   | Prospective cohort (United States)              | Community; school-based                         | 1992-2008 (16 y) | 476 people with ADHD                   | 19.7% female; mean age 8.5 y (at diagnosis) and 24.7 y (at FU); 61% white, 20% African American, 8% Hispanic; NA; 40% ODD, 33% anxiety disorder, 14% CD, 11% tic disorder, 4% affective disorder, 2% mania/hypomania | 11  | All-cause and specific cause of death | Yes | E: DSM-IV codes (ADHD, combined type)<br>O: deaths (any cause, external)                                                                                                                                      | Participants without ADHD                           | RR | Age and sex                                                                                             |
| Hirvikoski et al, <sup>47</sup> 2016                                 | Retrospective case-cohort/case-control (Sweden) | Mixed; population-based                         | 1987-2009 (NA)   | 27122 people with ASD                  | 31.1% female; mean age 19.8 y (at diagnosis); NA; NA; NA                                                                                                                                                             | 706 | All-cause and specific cause of death | Yes | E: ICD-9 codes 299x (ASD), ICD-10 codes F84.0 (autism), F84.1 (atypical autism), F84.2 (other childhood disintegrative disorder), F84.5 (Asperger syndrome), F84.8 (other pervasive developmental disorders), | General population                                  | OR | Age, sex and county of residence                                                                        |

|                                       |                                       |                              |                  |                         |                                                                                                                                                                                                                                                        |     |                                       |     |                                                                                                                                                                                                                                                                                                                                                                                  |                    |     |                                                                           |
|---------------------------------------|---------------------------------------|------------------------------|------------------|-------------------------|--------------------------------------------------------------------------------------------------------------------------------------------------------------------------------------------------------------------------------------------------------|-----|---------------------------------------|-----|----------------------------------------------------------------------------------------------------------------------------------------------------------------------------------------------------------------------------------------------------------------------------------------------------------------------------------------------------------------------------------|--------------------|-----|---------------------------------------------------------------------------|
|                                       |                                       |                              |                  |                         |                                                                                                                                                                                                                                                        |     |                                       |     | and F84.9 (pervasive developmental disorders not otherwise specified)<br>O: ICD-9, ICD-10 codes (any cause, infections, neoplasms, endocrine/metabolic, mental, nervous system, circulatory, respiratory, digestive, genitourinary, congenital anomalies, external)                                                                                                              |                    |     |                                                                           |
| Hosking et al, <sup>48</sup> 2016     | Retrospective cohort (United Kingdom) | Outpatient; population-based | 2009-2013 (3 y)  | 1532 people with ASD    | 58.1% female; mean age, 39.9 y (at FU); NA; NA; all children with intellectual disability                                                                                                                                                              | 15  | All-cause of death                    | No  | E: electronic health records in primary care – CPRD (intellectual disability patients with ASD)<br>O: ICD-10 codes (any cause)                                                                                                                                                                                                                                                   | General population | HR  | Age, sex, UK general practice, comorbidities, deprivation, smoking status |
| London and Landes, <sup>18</sup> 2016 | Retrospective cohort (United States)  | Community; population-based  | 2007-2011 (4 y)  | 654 people with ADHD    | 54.4% female; mean age, 47.6 y (at FU); NA; 82% white, 11% Hispanic, 14% foreign-born; NA                                                                                                                                                              | 13  | All-cause and specific cause of death | Yes | E: validated diagnosis with patient report (ADHD)<br>O: deaths (any cause)                                                                                                                                                                                                                                                                                                       | General population | OR  | Age, sex, race/ethnicity, foreign-born                                    |
| Schendel et al, <sup>49</sup> 2016    | Prospective cohort (Denmark)          | Community; population-based  | 1980-2013 (NA)   | 20492 people with ASD   | 22.4% female; most aged > 9 y (at diagnosis) median age, 19.0 y (at death); NA; NA; 68% mental/behavioral disorders (not ASD) and 12% neurological disorders: 27% ADHD, 16% intellectual disability, 8% episodic and paroxysmal disorders, 6% epilepsy | 68  | All-cause and specific cause of death | Yes | E: ICD-8 codes 299.00, 299.01, 299.02, and 299.03 (ASD), ICD-10 codes F84.0 (autism), F84.1 (atypical autism), F84.5 (Asperger syndrome), F84.8 (other pervasive developmental disorders), and F84.9 (pervasive developmental disorders not otherwise specified)<br>O: ICD-8, ICD-10 codes (any cause, natural causes: nervous system, unnatural/external: accidents, self-harm) | General population | HR  | Age (birth age, gestational age, parental age), sex, and birth weight     |
| Chen et al, <sup>19</sup> 2019        | Prospective cohort (Taiwan)           | Mixed; population-based      | 2000-2013 (14 y) | 275980 people with ADHD | 24.1% female; mean age, 9.6 y (at evaluation); 100% Asian; 22% level income ≥ NT\$ 40,000; 98% anxiety disorder, 3% intellectual disability, 2% autism, 2% congenital anomaly                                                                          | 727 | All-cause and specific cause of death | Yes | E: ICD-9 codes 314.x (attention deficit disorder)<br>O: ICD-9 codes (any cause, natural and unnatural/external)                                                                                                                                                                                                                                                                  | General population | HR  | Age, sex, income, comorbidities, outpatient visits                        |
| Hwang et al, <sup>21</sup> 2019       | Retrospective cohort (Australia)      | Community; population-based  | 2001-2015        | 35929 people with ASD   | 20.5% female; age ranged 5-64 y, mean age, 35.0 y (at death); NA; NA; 44.8% intellectual disability                                                                                                                                                    | 244 | All-cause and specific cause of death | Yes | E: ICD-10 codes F84.0 (autism), F84.1 (atypical autism), F84.5 (Asperger syndrome), F84.8 (other pervasive developmental disorders), and F84.9 (pervasive developmental disorders not otherwise specified)                                                                                                                                                                       | General population | SMR | Age and sex                                                               |

|                                               |                                            |                             |                    |                        |                                                                                                                                                                                                                                                                                             |     |                                       |     |                                                                                                                                                                                                                                                              |                                                                               |     |                                                                                                              |  |
|-----------------------------------------------|--------------------------------------------|-----------------------------|--------------------|------------------------|---------------------------------------------------------------------------------------------------------------------------------------------------------------------------------------------------------------------------------------------------------------------------------------------|-----|---------------------------------------|-----|--------------------------------------------------------------------------------------------------------------------------------------------------------------------------------------------------------------------------------------------------------------|-------------------------------------------------------------------------------|-----|--------------------------------------------------------------------------------------------------------------|--|
|                                               |                                            |                             |                    |                        |                                                                                                                                                                                                                                                                                             |     |                                       |     |                                                                                                                                                                                                                                                              | E: ICD-10 codes (any cause, neoplasms, nervous system, circulatory, external) |     |                                                                                                              |  |
| Kirby et al, <sup>50</sup> 2019               | Retrospective cohort (United States)       | Community; population-based | 1998-2017 (20 y)   | 16904 people with ASD  | 24.0% female; mean age, 18.4 (at FU); NA; 72% white, 8% Hispanic; NA                                                                                                                                                                                                                        | 49  | Specific cause of death               | Yes | E: ICD-9 codes 299.x, ICD-10 codes F84.x (ASD)<br>O: deaths (external: suicide death)                                                                                                                                                                        | General population                                                            | RR  | Sex                                                                                                          |  |
| Sun et al, <sup>17</sup> 2019                 | Prospective cohort (Sweden)                | Community; population-based | 1983-2013 (11.1 y) | 86670 people with ADHD | 33.2% female; mean age, 14.3 y (at diagnosis); NA; parental education, 10% postgraduate, 34% postsecondary, 51% upper secondary; parental employment, 90% employed; 19% anxiety disorder, 19% depression, 18% ASD, 7% intellectual disability, 7% conduct disorder, 4% personality disorder | 424 | All-cause and specific cause of death | Yes | E: ICD-10 codes F90x or the first prescription of ADHD medication (attention deficit hyperactivity disorder)<br>O: ICD-10 codes (any causes, natural and unnatural/external)                                                                                 | General population                                                            | HR  | Age (birth age, maternal age), sex, parental educational level, parental employment status, and birth weight |  |
| Yeh et al, <sup>51</sup> 2019                 | Retrospective case-control (United States) | Mixed; population-based     | 2000-2013 (NA)     | 4416 people with ADHD  | 22.5% female; most aged 40-64 y (at evaluation); NA; 10% low income, 62% < 25% college graduate                                                                                                                                                                                             | 67  | Specific cause of death               | Yes | E: ICD-9 codes 314.x (attention deficit disorder)<br>O: ICD-10 codes X60-X84, Y87.0 (external: suicide)                                                                                                                                                      | General population                                                            | OR  | Age, sex, insurance type, poverty level, and education                                                       |  |
| Fitzgerald et al, <sup>52</sup> 2019          | Retrospective cohort (Denmark)             | Community; population-based | 1995-2014 (21.5 y) | 32540 people with ADHD | 30.8% female; mean age, 21.5 (at follow-up); NA; 0.7% anxiety, 0.4% affective disorders, 0.4% ODD/CD, 0.4% SUS substance use disorder, 0.1% ASD, and other (less than 0.1%)                                                                                                                 | 35  | Specific cause of death               | Yes | E: ICD-8, ICD-10 codes 308.01, F90x or F98.8 (hyperkinetic disorders)<br>O: ICD-8, ICD-10 codes (external causes: suicide)                                                                                                                                   | General population                                                            | IRR | Age, sex, calendar year                                                                                      |  |
| Akobirshoev et al, <sup>53</sup> 2020         | Retrospective cohort (United States)       | Inpatient; population-based | 2004-2014 (NA)     | 34237 people with ASD  | 24.7% female; mean age, 33.1 y (at evaluation); 65% white, 11% black, 5% Hispanic; 26% private insurance, 54% psychiatric comorbidities, 21% epilepsy                                                                                                                                       | 462 | All-cause of death                    | No  | E: ICD-9 codes 299.0x, 299.8x, or 299.9x (ASD)<br>O: in-hospital deaths (any cause)                                                                                                                                                                          | General population                                                            | OR  | Age, sex, race/ethnicity, income, comorbidities, hospital                                                    |  |
| Jokiranta-Olkonieni et al, <sup>54</sup> 2020 | Retrospective cohort (Finland)             | Mixed; population-based     | 1987-2015 (NA)     | 4695 people with ASD   | 20.4% female; mean age 8.0 y (at diagnosis); NA; 78% comorbid psychiatric disorder: 24% affective and anxiety disorders, 13% intellectual disability, 3% SUD                                                                                                                                | 53  | All-cause and specific cause of death | Yes | E: ICD-10 codes F84.0 (autism), F84.5 (Asperger syndrome), F84.8 (other pervasive developmental disorders), and F84.9 (pervasive developmental disorders not otherwise specified)<br>O: ICD-8, ICD-9, ICD-10 codes (any cause, natural, accidents, suicides) | Participants without ASD                                                      | HR  | Sex, maternal socioeconomic status, comorbid psychiatric disorders, death in the family                      |  |



|                                     |                                                          |                                |                      |                          |                                                                                                                                                                                                                                            |     |                               |     |                                                                                                                   |                             |     |                                                                                                                            |
|-------------------------------------|----------------------------------------------------------|--------------------------------|----------------------|--------------------------|--------------------------------------------------------------------------------------------------------------------------------------------------------------------------------------------------------------------------------------------|-----|-------------------------------|-----|-------------------------------------------------------------------------------------------------------------------|-----------------------------|-----|----------------------------------------------------------------------------------------------------------------------------|
| Huang et al, <sup>55</sup><br>2021  | Retrospective cohort<br>(Taiwan)                         | Mixed;<br>population-based     | 2000-2015<br>(8.1 y) | 6599 people<br>with ASD  | 22.8% female; mean age, 11.9 y<br>(at evaluation); 100% Asian; 10%<br>level income ≥ NT\$ 35,000; 30%<br>anxiety disorder, 23% ADHD, 22%<br>intellectual disability, 17% tic<br>disorder, 10% epilepsy                                     | 119 | All-cause of<br>death         | No  | E: ICD-9 codes 299 (autism spectrum<br>disorder)<br>O: ICD-9 codes (any cause)                                    | General<br>population       | HR  | Age, sex,<br>income,<br>comorbidities<br>,<br>hospitalizations,<br>education,<br>behavioral<br>psychotherapy,<br>FU period |
| Kølves et al, <sup>56</sup><br>2021 | Retrospective cohort<br>(Denmark)                        | Community;<br>population-based | 1995-2016<br>(NA)    | 35020 people<br>with ASD | 26.6% female; most aged 10-29;<br>NA; 72% any other psychiatric<br>disorder; 33% ADHD, 16%<br>affective disorders, 15%<br>depression, 15% intellectual<br>disability, and other                                                            | 53  | Specific<br>cause of<br>death | Yes | E: ICD-8 codes 299.00 to 299.01, ICD-<br>10 codes F84.0 to F84.1 and F84.5 to<br>F84.9 (ASD)<br>O: suicide deaths | General<br>population       | IRR | Age, sex,<br>calendar year                                                                                                 |
| Smith et al, <sup>15</sup><br>2021  | Retrospective cohort<br>(Scotland,<br>United<br>Kingdom) | Community;<br>school-based     | 2008-2015<br>(3.9 y) | 9754 people<br>with ASD  | 14.0% female; most aged 10-19;<br>92% white, 2% Asian, 1% mixed;<br>24.0% most deprived according<br>to SIMD; 43% curriculum<br>adaptation disability, 27%<br>communication adaptation<br>disability, 7% physical adaptation<br>disability | 6   | All-cause of<br>death         | No  | E: record linkage in educational data<br>(autism)<br>O: ICD-10 codes (any causes)                                 | Participants<br>without ASD | SMR | Age and sex                                                                                                                |

CD: conduct disorder; CPRD: Clinical Practice Research Datalink; DSM: Diagnostic and Statistical Manual of Mental Disorders; SIMD: Scottish Index of Multiple Deprivation; E: exposure; ICD: International Classification of Disease; NA: not available; NT\$: New Taiwan dollars (1 US\$ = 32.1 NT\$ in 2010); ODD: oppositional defiant disorder; O: outcome; HR = hazard ratio; IRR = incidence rate ratio; OR = odds ratio; RR = rate ratio; SMR = standardized mortality ratio; SUD: substance use

**eTable 9. Main results of individual studies.**

| Author, year                                                                                         | Study design (country)<br>Setting, coverage                          | Number of participants (sex)                                         | Endpoint measure | Adjustment for confounding factors | Point estimates (95% confidence intervals)                                                                                                                                                                                                                                                                                                                                                                                                                                                                                                                                                                                                                                                                                                                                                                                                                                                                                                                                     |
|------------------------------------------------------------------------------------------------------|----------------------------------------------------------------------|----------------------------------------------------------------------|------------------|------------------------------------|--------------------------------------------------------------------------------------------------------------------------------------------------------------------------------------------------------------------------------------------------------------------------------------------------------------------------------------------------------------------------------------------------------------------------------------------------------------------------------------------------------------------------------------------------------------------------------------------------------------------------------------------------------------------------------------------------------------------------------------------------------------------------------------------------------------------------------------------------------------------------------------------------------------------------------------------------------------------------------|
| Kuperman et al, <sup>33</sup> 1988                                                                   | Retrospective cohort (United States);<br>Inpatient, population-based | 110 patients with ADHD<br>(20% girls and women)                      | SMR              | Age, sex and<br>calendar year      | Cause-specific mortality:<br>External causes (both): 0.79 (0.02-4.42) <sup>a</sup>                                                                                                                                                                                                                                                                                                                                                                                                                                                                                                                                                                                                                                                                                                                                                                                                                                                                                             |
| Pickett et al, <sup>13</sup> 2006; Shavelle et al, <sup>34</sup> 2001; Shavelle et al, <sup>35</sup> | Retrospective cohort (United States);<br>Community, population-based | 13111 patients with ASD<br>(21% girls and women)                     | SMR              | Age and sex                        | All-cause mortality:<br>All-cause (both, 1983-2002): 2.45 (2.18-2.76) <sup>a</sup><br>All-cause (men,1983-2002): 1.86 (1.63-2.14) <sup>a</sup><br>All-cause (women,1983-2002): 5.35 (4.27-6.72) <sup>a</sup><br>All-cause (both, 1998-2002): 2.60 (2.07-3.22)<br>All-cause (men,1998-2002): 2.30 (1.78-2.92)<br>All-cause (women,1998-2002): 5.33 (3.16-8.48)<br>All-cause (both,1983-1997): 2.40 (2.09-2.75)<br>All-cause (men,1983-1997): 1.70 (1.44-2.00)<br>All-cause (women,1983-1997): 5.36 (4.12-6.87)<br>Cause specific mortality (1983-1997):<br>Neoplasms (both): 2.58 (1.67-3.97) <sup>a</sup><br>Nervous system and sense organs (both): 16.76 (11.14-25.21) <sup>a</sup><br>Respiratory (both): 5.86 (3.62-9.48) <sup>a</sup><br>Digestive (both): 6.74 (3.87-11.74) <sup>a</sup><br>Congenital anomalies (both): 7.16 (4.35-11.78) <sup>a</sup><br>External causes (both): 4.50 (3.56-5.69) <sup>a</sup><br>Natural causes (both): 6.73 (5.46-8.30) <sup>a</sup> |
| Barkley et al, <sup>36</sup> 2008; Barkley et al, <sup>37</sup> 1990                                 | Retrospective cohort (United States);<br>Outpatient, health services | 158 patients with ADHD (9%<br>girls and women), and their<br>parents | RR               | None                               | All-cause mortality:<br>All-cause (both): 0.77 (0.13-4.51) <sup>a</sup><br>All-cause (fathers): 2.56 (0.12-52.75) <sup>a</sup><br>All-cause (mothers): 1.54 (0.06-37.32) <sup>a</sup><br>Cause specific mortality:<br>External causes (both): 1.54 (0.16-14.55) <sup>a</sup><br>External causes (fathers): 2.56 (0.12-52.75) <sup>a</sup><br>External causes (mothers): 1.54 (0.06-37.32) <sup>a</sup>                                                                                                                                                                                                                                                                                                                                                                                                                                                                                                                                                                         |
| Mouridsen et al, <sup>38</sup> 2008;<br>Isager et al, <sup>39</sup> 1999                             | Retrospective cohort (Denmark);<br>Inpatient, population-based       | 341 patients with ASD (25%<br>girls and women)                       | SMR              | Age, sex and<br>calendar year      | All-cause mortality:<br>All-cause (both): 1.93 (1.26-2.82)<br>All-cause (men): 1.57 (0.93-2.48)<br>All-cause (women): 4.01 (1.73-7.90)<br>Cause specific mortality:<br>Nervous system and sense organs (both) - epilepsy: 35.0 (9.5-89.6)                                                                                                                                                                                                                                                                                                                                                                                                                                                                                                                                                                                                                                                                                                                                      |
| Gillberg et al, <sup>40</sup> 2010                                                                   | Prospective cohort (Sweden);<br>Community, population-based          | 120 patients with ASD (29%<br>girls and women)                       | SMR              | Age, sex and<br>calendar year      | All-cause mortality:<br>All-cause (both): 5.56 (2.71-10.20)<br>All-cause (men): 2.26 (0.57-6.14)<br>All-cause (women): 20.69 (8.39-43.03)                                                                                                                                                                                                                                                                                                                                                                                                                                                                                                                                                                                                                                                                                                                                                                                                                                      |

|                                                                      |                                                                      |                                                          |     |                                                                                                                                       |                                                                                                                                                                                                                                                                                                                                                                                                                                                                                                                                                                                      |
|----------------------------------------------------------------------|----------------------------------------------------------------------|----------------------------------------------------------|-----|---------------------------------------------------------------------------------------------------------------------------------------|--------------------------------------------------------------------------------------------------------------------------------------------------------------------------------------------------------------------------------------------------------------------------------------------------------------------------------------------------------------------------------------------------------------------------------------------------------------------------------------------------------------------------------------------------------------------------------------|
| Klein et al, <sup>41</sup> 2012                                      | Prospective cohort (United States);<br>Community, school-based       | 207 patients with ADHD (0% girls and women)              | RR  | None                                                                                                                                  | All-cause mortality:<br>All-cause (men): 2.58 (0.96-6.96) <sup>a</sup>                                                                                                                                                                                                                                                                                                                                                                                                                                                                                                               |
| Barbareasi et al, <sup>42</sup> 2013                                 | Prospective cohort (United States);<br>Community, population-based   | 367 patients with ADHD (28% girls and women)             | SMR | Age and sex                                                                                                                           | All-cause mortality:<br>All-cause (both): 1.88 (0.83-4.26)<br>Cause specific mortality:<br>External causes (both): 2.78 (1.12-6.90) <sup>a</sup>                                                                                                                                                                                                                                                                                                                                                                                                                                     |
| Bilder et al, <sup>14</sup> 2013                                     | Retrospective cohort (United States);<br>Community, population-based | 305 patients with ASD (25% girls and women)              | HR  | Age (maternal, gestational, at mother's death, at father's death), sex, and birth weight                                              | All-cause mortality:<br>All-cause (both): 11.59 (6.24-21.53)<br>All-cause (men): 9.91 (4.77-20.60)<br>All-cause (women): 30.14 (6.31-143.87)<br>All-cause (siblings): 1.19 (0.28-4.98) <sup>a</sup>                                                                                                                                                                                                                                                                                                                                                                                  |
| Fairthorne et al, <sup>43</sup> 2014                                 | Retrospective cohort (Australia);<br>Community, population-based     | 2041 mothers of children with ASD (100% girls and women) | HR  | Age                                                                                                                                   | All-cause mortality:<br>All-cause (mother): 1.60 (1.06-2.40) <sup>a</sup><br>Cause specific mortality:<br>Neoplasms (mother): 1.54 (0.80-2.90)                                                                                                                                                                                                                                                                                                                                                                                                                                       |
| Dalsgaard et al, <sup>16</sup> 2015; Scott et al, <sup>44</sup> 2017 | Retrospective cohort (Denmark);<br>Community, population-based       | 32061 patients with ADHD (26% girls and women)           | RR  | Age, sex, calendar year, parental history of psychiatric disorders, maternal/paternal age, parental educational and employment status | All-cause mortality:<br>All-cause (both): 2.07 (1.70-2.50)<br>All-cause (men): 1.93 (1.55-2.38)<br>All-cause (women): 3.01 (1.87-4.55)<br>Cause specific mortality:<br>Natural causes (both): 1.70 (1.11-2.47)<br>Natural causes (men): 1.38 (0.82-2.16)<br>Natural causes (women): 3.33 (1.51-6.24)<br>External causes (both): 2.40 (1.81-3.13)<br>External causes (men): 2.29 (1.69-3.04)<br>External causes (women): 3.51 (1.50-6.85)                                                                                                                                             |
| Koisaari et al, <sup>45</sup> 2015                                   | Prospective cohort (Finland);<br>Community, health services          | 122 patients with ADHD (29% girls and women)             | RR  | None                                                                                                                                  | All-cause mortality:<br>All-cause (both): 17.72 (1.06-296.8) <sup>a</sup><br>All-cause (men): 9.77 (0.59-162.6) <sup>a</sup><br>All-cause (women): 4.50 (0.19-107.4) <sup>a</sup><br>Cause specific mortality:<br>Endocrine, nutritional and metabolic (both): 2.29 (0.09-55.64) <sup>a</sup><br>Nervous system (both): 2.29 (0.09-55.64) <sup>a</sup><br>Circulatory (both): 3.85 (0.19-79.28) <sup>a</sup><br>Digestive (both): 2.29 (0.09-55.64) <sup>a</sup><br>External causes (both): 10.02 (0.57-175.5) <sup>a</sup><br>Natural causes (both): 2.64 (0.54-12.83) <sup>a</sup> |
| Hetchtman et al, <sup>46</sup> 2016                                  | Prospective cohort (United States);<br>Community, school-based       | 476 patients with ADHD (20% girls and women)             | RR  | Age and sex                                                                                                                           | All-cause mortality:<br>All-cause (both): 5.06 (0.65-39.32) <sup>a</sup><br>Cause specific mortality:<br>External causes (both): 5.06 (0.65-39.32) <sup>a</sup>                                                                                                                                                                                                                                                                                                                                                                                                                      |
| Hirvikoski et al, <sup>47</sup> 2016                                 | Retrospective case-cohort (Sweden);<br>Mixed, population-based       | 27122 patients with ASD (31% girls and women)            | OR  | Age, sex and county of residence                                                                                                      | All-cause mortality:<br>All-cause (both): 2.56 (2.38-2.76)                                                                                                                                                                                                                                                                                                                                                                                                                                                                                                                           |

|                                       |                                                                     |                                              |    |                                                                           |                                                                                                                                                                                                                                                                                                                                                                                                                                                                                                                                                                                                                                                                                                                                                                                                                                                                                                                                                                                                                                                                                                                                                                                                                                                                                                                                                                                                                                                                                                                                                                                                                                                                                                                                                            |
|---------------------------------------|---------------------------------------------------------------------|----------------------------------------------|----|---------------------------------------------------------------------------|------------------------------------------------------------------------------------------------------------------------------------------------------------------------------------------------------------------------------------------------------------------------------------------------------------------------------------------------------------------------------------------------------------------------------------------------------------------------------------------------------------------------------------------------------------------------------------------------------------------------------------------------------------------------------------------------------------------------------------------------------------------------------------------------------------------------------------------------------------------------------------------------------------------------------------------------------------------------------------------------------------------------------------------------------------------------------------------------------------------------------------------------------------------------------------------------------------------------------------------------------------------------------------------------------------------------------------------------------------------------------------------------------------------------------------------------------------------------------------------------------------------------------------------------------------------------------------------------------------------------------------------------------------------------------------------------------------------------------------------------------------|
|                                       |                                                                     |                                              |    |                                                                           | <p>All-cause (men): 2.87 (2.60-3.16)<br/> All-cause (women): 2.24 (1.99-2.51)<br/> Cause specific mortality:<br/> Infectious (both): 1.83 (0.75-4.30)<br/> Neoplasms (both): 1.80 (1.46-2.23)<br/> Neoplasms (men): 1.79 (1.34-2.38)<br/> Neoplasms (women): 1.83 (1.33-2.50)<br/> Endocrine, nutritional and metabolic (both): 3.70 (2.34-5.87)<br/> Endocrine, nutritional and metabolic (men): 2.11 (0.94-4.73)<br/> Endocrine, nutritional and metabolic (women): 5.70 (3.25-9.99)<br/> Mental and behavioral (both): 2.80 (1.94-4.03)<br/> Mental and behavioral (men): 3.31 (1.85-5.92)<br/> Mental and behavioral (women): 2.53 (1.58-4.05)<br/> Nervous system (both): 7.49 (5.78-9.72)<br/> Nervous system (men): 10.19 (7.27-14.29)<br/> Nervous system (women): 5.29 (3.50-7.99)<br/> Circulatory (both): 1.49 (1.27-1.75)<br/> Circulatory (men): 2.02 (1.64-2.49)<br/> Circulatory (women): 1.10 (0.86-1.40)<br/> Respiratory (both): 2.68 (1.99-3.62)<br/> Respiratory (men): 2.16 (1.36-3.42)<br/> Respiratory (women): 3.24 (2.18-4.79)<br/> Digestive (both): 3.31 (2.25-4.87)<br/> Digestive (men): 3.81 (2.31-6.29)<br/> Digestive (women): 2.78 (1.52-5.07)<br/> Genitourinary (both): 3.82 (2.13-6.84)<br/> Congenital anomalies (both): 19.10 (11.94-30.55)<br/> Congenital anomalies (men): 11.07 (5.30-23.13)<br/> Congenital anomalies (women): 33.86 (18.04-63.56)<br/> External causes (both): 4.99 (4.13-6.04)<sup>a</sup><br/> External causes (men): 4.27 (3.39-5.39)<sup>a</sup><br/> External causes (women): 7.65 (5.48-10.68)<sup>a</sup><br/> Natural causes (both): 2.59 (2.36-2.85)<sup>a</sup><br/> Natural causes (men): 2.85 (2.50-3.24)<sup>a</sup><br/> Natural causes (women): 2.44 (2.12-2.80)<sup>a</sup></p> |
| Hosking et al, <sup>48</sup> 2016     | Retrospective cohort (United Kingdom); Outpatient, population-based | 1532 patients with ASD (58% girls and women) | HR | Age, sex, UK general practice, comorbidities, deprivation, smoking status | <p>All-cause mortality:<br/> All-cause (both): 2.22 (1.01-4.86)</p>                                                                                                                                                                                                                                                                                                                                                                                                                                                                                                                                                                                                                                                                                                                                                                                                                                                                                                                                                                                                                                                                                                                                                                                                                                                                                                                                                                                                                                                                                                                                                                                                                                                                                        |
| London and Landes, <sup>18</sup> 2016 | Prospective cohort (United States); Community, population-based     | 654 patients with ADHD (54% girls and women) | OR | Age, sex, race/ethnicity, foreign-born                                    | <p>All-cause mortality:<br/> All-cause (both): 1.78 (1.01-3.12)</p>                                                                                                                                                                                                                                                                                                                                                                                                                                                                                                                                                                                                                                                                                                                                                                                                                                                                                                                                                                                                                                                                                                                                                                                                                                                                                                                                                                                                                                                                                                                                                                                                                                                                                        |

|                                      |                                                                        |                                                    |     |                                                                                                                                |                                                                                                                                                                                                                                                                                                                                                                                                                                                                                                                            |
|--------------------------------------|------------------------------------------------------------------------|----------------------------------------------------|-----|--------------------------------------------------------------------------------------------------------------------------------|----------------------------------------------------------------------------------------------------------------------------------------------------------------------------------------------------------------------------------------------------------------------------------------------------------------------------------------------------------------------------------------------------------------------------------------------------------------------------------------------------------------------------|
| Schendel et al, <sup>49</sup> 2016   | Prospective cohort (Denmark);<br>Community, population-based           | 20492 patients with ASD<br>(22.4% girls and women) | HR  | Age (birth age,<br>gestational age,<br>parental age), sex,<br>and birth weight                                                 | All-cause mortality:<br>All-cause (both): 2.00 (1.50-2.80)<br>All-cause (men): 1.80 (1.20-2.60)<br>All-cause (women): 3.50 (1.70-7.00)<br>Cause specific mortality:<br>Natural causes (both): 2.20 (1.50-3.20)<br>Nervous system (both):4.10 (2.00-8.80)<br>External causes (both): 2.00 (1.40-2.80)                                                                                                                                                                                                                       |
| Chen et al, <sup>19</sup> 2019       | Prospective cohort (Taiwan);<br>Mixed, population-based                | 275980 patients with ADHD<br>(24% girls and women) | HR  | Age, sex, income,<br>comorbidities,<br>outpatient visits                                                                       | All-cause mortality:<br>All-cause (both): 1.07 (1.00-1.17)<br>All-cause (men): 1.04 (0.94-1.14)<br>All-cause (women): 1.24 (1.04-1.48)<br>Cause specific mortality:<br>Natural causes (both): 0.91 (0.80-1.15)<br>Natural causes (men): 0.83 (0.72-1.15)<br>Natural causes (women): 1.03 (0.82-1.30)<br>External causes (both): 1.51 (1.32-1.72) <sup>a</sup><br>External causes (men): 1.45 (1.25-1.67) <sup>a</sup><br>External causes (women): 1.82 (1.32-2.51) <sup>a</sup>                                            |
| Hwang et al, <sup>21</sup> 2019      | Retrospective cohort (Australia);<br>Community, population-based       | 35929 patients with ASD<br>(20% girls and women)   | SMR | Age and sex                                                                                                                    | All-cause mortality:<br>All-cause (both): 2.06 (1.64-2.58)                                                                                                                                                                                                                                                                                                                                                                                                                                                                 |
| Kirby et al, <sup>50</sup> 2019      | Retrospective cohort (United States);<br>Community, population-based   | 16094 patients with ASD<br>(24% girls and women)   | RR  | Sex                                                                                                                            | Cause specific mortality:<br>External causes (both): 1.18 (0.89-1.56) <sup>a</sup><br>External causes (men): 0.83 (0.61-1.12) <sup>a</sup><br>External causes (women): 3.42 (1.63-7.20)                                                                                                                                                                                                                                                                                                                                    |
| Sun et al, <sup>17</sup> 2019        | Prospective cohort (Sweden);<br>Community, population-based            | 86670 patients with ADHD<br>(33% girls and women)  | HR  | Age (birth age,<br>maternal age), sex,<br>parental<br>educational level,<br>parental<br>employment status,<br>and birth weight | All-cause mortality:<br>All-cause (both): 3.94 (3.51-4.43)<br>All-cause (men): 4.63 (4.09-5.25) <sup>a,b</sup><br>All-cause (women): 5.49 (4.46-6.76) <sup>a,b</sup><br>Cause specific mortality:<br>Natural causes (both): 2.47 (1.66-3.68)<br>Natural causes (men): 1.76 (1.33-3.32) <sup>b</sup><br>Natural causes (women): 2.70 (1.81-4.04) <sup>b</sup><br>External causes (both): 6.48 (5.12-8.21)<br>External causes (men): 5.01 (4.40-5.71) <sup>b</sup><br>External causes (women): 7.11 (5.58-9.06) <sup>b</sup> |
| Yeh et al, <sup>51</sup> 2019        | Retrospective case-control (United<br>States); Mixed, population-based | 4416 patients with ADHD<br>(22% girls and women)   | OR  | Age, sex, insurance<br>type, poverty level,<br>and education                                                                   | Cause specific mortality:<br>External causes (both): 2.37 (1.79-3.15)<br>External causes (men): 1.92 (1.38-2.67)<br>External causes (women): 3.14 (1.80-5.50)                                                                                                                                                                                                                                                                                                                                                              |
| Fitzgerald et al, <sup>52</sup> 2019 | Retrospective cohort (Denmark);<br>Community, population-based         | 32540 patients with ADHD<br>(31% girls and women)  | IRR | Age, sex and<br>calendar year                                                                                                  | Cause specific mortality:<br>External causes (both): 3.20 (2.29-4.47)<br>External causes (men): 2.98 (2.06-4.30)                                                                                                                                                                                                                                                                                                                                                                                                           |

|                                                  |                                                                      |                                                  |     |                                                                                                                                                             |                                                                                                                                                                                                                                                                                                                                                                                                                                                                |
|--------------------------------------------------|----------------------------------------------------------------------|--------------------------------------------------|-----|-------------------------------------------------------------------------------------------------------------------------------------------------------------|----------------------------------------------------------------------------------------------------------------------------------------------------------------------------------------------------------------------------------------------------------------------------------------------------------------------------------------------------------------------------------------------------------------------------------------------------------------|
|                                                  |                                                                      |                                                  |     |                                                                                                                                                             | External causes (women): 1.47 (0.66-3.27)                                                                                                                                                                                                                                                                                                                                                                                                                      |
| Akobirshoev et al, <sup>53</sup> 2020            | Retrospective cohort (United States);<br>Inpatient, population-based | 34237 patients with ASD<br>(25% girls and women) | OR  | Age, sex,<br>race/ethnicity,<br>income,<br>comorbidities,<br>hospital (bed size<br>and region)                                                              | All-cause mortality:<br>All-cause (both): 1.51 (1.33-1.72)<br>All-cause (men): 1.25 (1.08-1.45)<br>All-cause (women): 2.75 (2.09-3.64)                                                                                                                                                                                                                                                                                                                         |
| Jokiranta-Olkonieni et al, <sup>54</sup><br>2020 | Retrospective cohort (Sweden);<br>Mixed; population-based            | 4695 patients with ASD (20%<br>girls and women)  | HR  | Sex, maternal<br>socioeconomic<br>status, comorbid<br>psychiatric<br>disorders,<br>psychiatric disorders<br>among family<br>members, death in<br>the family | All-cause mortality:<br>All-cause (both): 1.70 (1.20-2.60)<br>All-cause (men): 1.50 (0.9-2.30)<br>All-cause (women): 5.30 (1.70-16.30)<br>Cause specific mortality:<br>Natural (both): 6.10 (2.70-13.50)<br>Natural (men): 4.40 (2.00-9.80)<br>Natural (women): 29.60 (3.20-275.10)<br>External causes (both): 1.08 (0.65-1.78) <sup>a</sup><br>External causes (men): 1.09 (0.65-1.83) <sup>a</sup><br>External causes (women): 1.04 (0.17-6.27) <sup>a</sup> |
| Huang et al, <sup>55</sup> 2021                  | Retrospective cohort (Taiwan);<br>Mixed; population-based            | 6599 patients with ASD (23%<br>girls and women)  | HR  | Age, sex, income,<br>comorbidities,<br>hospitalizations,<br>education,<br>behavioral<br>psychotherapy,<br>follow-up period                                  | All-cause mortality:<br>All-cause (both): 2.79 (2.44-3.18) <sup>a</sup>                                                                                                                                                                                                                                                                                                                                                                                        |
| Kölves et al, <sup>56</sup> 2021                 | Retrospective cohort (Denmark);<br>Community, population-based       | 35020 patients with ASD<br>(27% girls and women) | IRR | Age, sex and<br>calendar year                                                                                                                               | Cause specific mortality:<br>External causes (both): 3.75 (2.85-4.92)<br>External causes (men): 3.48 (2.57-4.74)<br>External causes (women): 2.63 (1.46-4.76)                                                                                                                                                                                                                                                                                                  |
| Smith et al, <sup>15</sup> 2021                  | Retrospective cohort (Scotland);<br>Community, school-based          | 9754 patients with ASD (14%<br>girls and women)  | SMR | Age and sex                                                                                                                                                 | All-cause mortality:<br>All-cause (both): 1.10 (0.50-2.50)                                                                                                                                                                                                                                                                                                                                                                                                     |

<sup>a</sup> Results were calculated based on the original data using a fixed-effect model (as defined in our study protocol). <sup>b</sup> Additional data provided by study authors. HR = hazard ratio; IRR = incidence rate ratio; OR = odds ratio; RR = rate ratio; SMR = standardized mortality ratio.

**eTable 10. Methodological quality assessment of included studies (Newcastle-Ottawa Scale)**

| <p><b>NEWCASTLE - OTTAWA QUALITY ASSESSMENT SCALE CASE CONTROL STUDIES</b><br/> <u>Note:</u> A study can be awarded a maximum of one star for each numbered item within the Selection and Exposure categories. A maximum of two stars can be given for Comparability.</p>                                                                                                                                                                                                                                                                                                                                                                                                                                                                                                                                                                                                                                                                                                                                                                                                                                                                                                                                                                                                                                                                                                                                                                                                                                                                                                                                                                                                          | <p><b>NEWCASTLE - OTTAWA QUALITY ASSESSMENT SCALE COHORT STUDIES</b><br/> <u>Note:</u> A study can be awarded a maximum of one star for each numbered item within the Selection and Outcome categories. A maximum of two stars can be given for Comparability</p>                                                                                                                                                                                                                                                                                                                                                                                                                                                                                                                                                                                                                                                                                                                                                                                                                                                                                                                                                                                                                                                                                                                                                                                                                                                                                                                                                                                                                                                                                                                                                                                                                                                                             |
|------------------------------------------------------------------------------------------------------------------------------------------------------------------------------------------------------------------------------------------------------------------------------------------------------------------------------------------------------------------------------------------------------------------------------------------------------------------------------------------------------------------------------------------------------------------------------------------------------------------------------------------------------------------------------------------------------------------------------------------------------------------------------------------------------------------------------------------------------------------------------------------------------------------------------------------------------------------------------------------------------------------------------------------------------------------------------------------------------------------------------------------------------------------------------------------------------------------------------------------------------------------------------------------------------------------------------------------------------------------------------------------------------------------------------------------------------------------------------------------------------------------------------------------------------------------------------------------------------------------------------------------------------------------------------------|-----------------------------------------------------------------------------------------------------------------------------------------------------------------------------------------------------------------------------------------------------------------------------------------------------------------------------------------------------------------------------------------------------------------------------------------------------------------------------------------------------------------------------------------------------------------------------------------------------------------------------------------------------------------------------------------------------------------------------------------------------------------------------------------------------------------------------------------------------------------------------------------------------------------------------------------------------------------------------------------------------------------------------------------------------------------------------------------------------------------------------------------------------------------------------------------------------------------------------------------------------------------------------------------------------------------------------------------------------------------------------------------------------------------------------------------------------------------------------------------------------------------------------------------------------------------------------------------------------------------------------------------------------------------------------------------------------------------------------------------------------------------------------------------------------------------------------------------------------------------------------------------------------------------------------------------------|
| <p><b>Selection</b></p> <p>1) <u>Is the case definition adequate?</u><br/>           a) yes, with independent validation *<br/>           b) yes, e.g. record linkage or based on self-reports<br/>           c) no description</p> <p>2) <u>Representativeness of the cases</u><br/>           a) consecutive or obviously representative series of cases *<br/>           b) potential for selection biases or not stated</p> <p>3) <u>Selection of Controls</u><br/>           a) community controls *<br/>           b) hospital controls<br/>           c) no description</p> <p>4) <u>Definition of Controls</u><br/>           a) no history of disease (endpoint) *<br/>           b) no description of source</p> <p><b>Comparability</b></p> <p>1) <u>Comparability of cases and controls on the basis of the design or analysis</u><br/>           a) study controls for age and sex *<br/>           b) study controls for any additional factor (e.g. medication, smoking, comorbidities) *</p> <p><b>Exposure</b></p> <p>1) <u>Ascertainment of exposure</u><br/>           a) secure record (eg surgical records) *<br/>           b) structured interview where blind to case/control status *<br/>           c) interview not blinded to case/control status<br/>           d) written self-report or medical record only<br/>           e) no description</p> <p>2) <u>Same method of ascertainment for cases and controls</u><br/>           a) yes *<br/>           b) no</p> <p>3) <u>Non-Response rate</u><br/>           a) same rate for both groups *<br/>           b) non-respondents described<br/>           c) rate different and no designation</p> | <p><b>Selection</b></p> <p>1) <u>Representativeness of the exposed cohort</u><br/>           a) truly representative of the average in the community *<br/>           b) somewhat representative of the average in the community *<br/>           c) selected group of users (e.g. nurses, volunteers)<br/>           d) no description of the derivation of the cohort</p> <p>2) <u>Selection of the non-exposed cohort</u><br/>           a) drawn from the same community as the exposed cohort *<br/>           b) drawn from a different source<br/>           c) no description of the derivation of the non-exposed cohort</p> <p>3) <u>Ascertainment of exposure</u><br/>           a) secure record (e.g. surgical records) *<br/>           b) structured interview *<br/>           c) written self-report<br/>           d) no description</p> <p>4) <u>Demonstration that outcome of interest was not present at start of study</u><br/>           a) yes *<br/>           b) no</p> <p><b>Comparability</b></p> <p>1) <u>Comparability of cohorts on the basis of the design or analysis</u><br/>           a) study controls for age and sex *<br/>           b) study controls for any additional factor (e.g. medication, smoking, comorbidities...) *</p> <p><b>Outcome</b></p> <p>1) <u>Assessment of outcome</u><br/>           a) independent blind assessment *<br/>           b) record linkage *<br/>           c) self-report<br/>           d) no description</p> <p>2) <u>Was follow-up long enough for outcomes to occur</u><br/>           a) yes *<br/>           b) no</p> <p>3) <u>Adequacy of follow up of cohorts</u><br/>           a) complete follow up - all subjects accounted for *<br/>           b) subjects lost to follow up unlikely to introduce bias *<br/>           c) follow up rate &lt; 40% (select an adequate %) and/or no description of those lost<br/>           d) no statement</p> |

**eTable 10 (cont). Methodological quality assessment of included studies (Newcastle-Ottawa Scale)**

| Author, year                                                                                         | 1. Selection |     |     |     | 2. Comparability | 3. Outcome |     |     | Total score | Quality assessment – risk of bias rating |
|------------------------------------------------------------------------------------------------------|--------------|-----|-----|-----|------------------|------------|-----|-----|-------------|------------------------------------------|
|                                                                                                      | 1.1          | 1.2 | 1.3 | 1.4 | 2.1              | 3.1        | 3.2 | 3.3 |             |                                          |
| Kuperman et al, <sup>33</sup> 1988                                                                   | *            | *   | *   | *   | *                | *          | *   |     | 7           | Low risk                                 |
| Pickett et al, <sup>13</sup> 2006; Shavelle et al, <sup>34</sup> 2001; Shavelle et al, <sup>35</sup> | *            | *   | *   | *   | *                | *          | *   |     | 7           | Low risk                                 |
| Barkley et al, <sup>36</sup> 2008; Barkley et al, <sup>37</sup> 1990                                 | *            |     | *   | *   |                  |            | *   |     | 4           | Moderate risk                            |
| Mouridsen et al, <sup>38</sup> 2008; Isager et al, <sup>39</sup> 1999                                | *            | *   | *   | *   | *                | *          | *   |     | 7           | Low risk                                 |
| Gillberg et al, <sup>40</sup> 2010                                                                   | *            | *   | *   | *   | *                | *          | *   |     | 7           | Low risk                                 |
| Klein et al, <sup>41</sup> 2012                                                                      | *            | *   | *   | *   |                  |            | *   |     | 4           | Moderate risk                            |
| Barbaresi et al, <sup>42</sup> 2013                                                                  | *            | *   | *   | *   | *                | *          | *   | *   | 8           | Low risk                                 |
| Bilder et al, <sup>14</sup> 2013                                                                     | *            | *   | *   | *   | **               | *          | *   |     | 8           | Low risk                                 |
| Fairthorne et al, <sup>43</sup> 2014                                                                 | *            | *   |     |     | *                | *          |     |     | 4           | Moderate risk                            |
| Dalsgaard et al, <sup>16</sup> 2015; Scott et al, <sup>44</sup> 2017                                 | *            | *   | *   | *   | **               | *          | *   | *   | 9           | Low risk                                 |
| Koisaari et al, <sup>45</sup> 2015                                                                   | *            | *   | *   | *   |                  |            | *   |     | 5           | Moderate risk                            |
| Hetchman et al, <sup>46</sup> 2016                                                                   | *            | *   | *   | *   | *                |            | *   |     | 6           | Moderate risk                            |
| Hirvikoski et al, <sup>47</sup> 2016                                                                 | *            | *   | *   |     | *                | *          | *   | *   | 7           | Low risk                                 |
| Hosking et al, <sup>48</sup> 2016                                                                    |              | *   | *   | *   | **               | *          | *   |     | 7           | Low risk                                 |
| London and Landes, <sup>18</sup> 2016                                                                |              | *   |     | *   | **               | *          | *   |     | 6           | Moderate risk                            |
| Schendel et al, <sup>49</sup> 2016                                                                   | *            | *   | *   | *   | **               | *          | *   | *   | 9           | Low risk                                 |
| Chen et al, <sup>19</sup> 2019                                                                       | *            | *   | *   | *   | **               | *          | *   | *   | 9           | Low risk                                 |
| Hwang et al, <sup>21</sup> 2019                                                                      | *            | *   | *   | *   | *                | *          | *   |     | 7           | Low risk                                 |
| Kirby et al, <sup>50</sup> 2019                                                                      | *            | *   | *   | *   |                  | *          | *   |     | 6           | Moderate risk                            |
| Sun et al, <sup>17</sup> 2019                                                                        | *            | *   | *   | *   | **               | *          | *   | *   | 9           | Low risk                                 |
| Yeh et al, <sup>51</sup> 2019                                                                        |              | *   |     |     | **               | *          | *   |     | 5           | Moderate risk                            |
| Fitzgerald et al, <sup>52</sup> 2019                                                                 | *            | *   | *   | *   | *                | *          | *   | *   | 8           | Low risk                                 |
| Akobirshoev et al, <sup>53</sup> 2020                                                                |              |     | *   | *   | **               | *          |     |     | 5           | Moderate risk                            |
| Jokiranta-Olkonieni et al, <sup>54</sup> 2020                                                        | *            | *   | *   | *   | *                |            | *   |     | 6           | Moderate risk                            |
| Huang et al, <sup>55</sup> 2021                                                                      | *            | *   | *   | *   | **               | *          | *   | *   | 9           | Low risk                                 |
| Köives et al, <sup>56</sup> 2021                                                                     | *            | *   | *   | *   | *                | *          | *   | *   | 8           | Low risk                                 |
| Smith et al, <sup>15</sup> 2021                                                                      | *            | *   | *   | *   | *                | *          |     |     | 6           | Moderate risk                            |

Note: Risk of bias rating: 0-3 high risk of bias (low quality), 4-6 moderate risk of bias (moderate quality), 7-9 low risk of bias (high quality).





**eTable 11. Grading certainty (or credibility) of evidence for summary estimates**

|                                                                                                                                                                                                                                                                                                                                                                                                                                                                                                                                                                                                                                                                                                                                                                                                                                                                                                                                                                                                                                                                                                                                                                                                                                                                                                                                                                                                                                                                                                                                                                                                                                                                                                                                                                                                         |
|---------------------------------------------------------------------------------------------------------------------------------------------------------------------------------------------------------------------------------------------------------------------------------------------------------------------------------------------------------------------------------------------------------------------------------------------------------------------------------------------------------------------------------------------------------------------------------------------------------------------------------------------------------------------------------------------------------------------------------------------------------------------------------------------------------------------------------------------------------------------------------------------------------------------------------------------------------------------------------------------------------------------------------------------------------------------------------------------------------------------------------------------------------------------------------------------------------------------------------------------------------------------------------------------------------------------------------------------------------------------------------------------------------------------------------------------------------------------------------------------------------------------------------------------------------------------------------------------------------------------------------------------------------------------------------------------------------------------------------------------------------------------------------------------------------|
| <p>Global Burden of Disease (GBD) criteria and GRADE system emphasize certainty (or credibility) of evidence based on randomized controlled data. For many risks in the biomedical literature (such as disease comorbidity), we will never have randomized controlled trials, and to restrict the assessment of exposures (or risks factors) to only those with trial evidence would lead us to ignore some of the most important determinants of health. Randomized controlled trials are unavailable for our research question. It is for this reason that we have used modified criteria of “convincing/high certainty” or “probable/moderate certainty” evidence for causality. If well designed and reported observational cohort studies form the evidence base the certainty rating starts with high/convincing evidence. If well designed and reported case-control studies form the evidence base the rating starts with moderate/probable evidence. Because the GRADE system does not yet have a scale for assessing non-interventional observational studies, we used a modified version to describe the validity and trustability of the evidence we presented in each meta-analysis. In brief, we rated the evidence as “convincing or high” when we are highly confident that the true effect lies close to that estimated. For example, evidence is judged as “convincing or high” if all of the following apply:</p> <ul style="list-style-type: none"> <li>• There are multiple cohort studies included in the analyses with no major limitations (low risk of bias according to NOS scale)</li> <li>• Summary effect estimate P value &lt; 10<sup>-6</sup></li> <li>• The summary estimate has a narrow confidence interval (95% predictive interval excluding null value)</li> </ul> |
| <p>We rated the evidence as “probable or moderate” when we consider the true effect is likely to be close to the estimate of the effect, but there is a possibility that it is substantially different. For example, evidence might be judged as “probable or moderate” if any of the following applies:</p> <ul style="list-style-type: none"> <li>• There are only few studies and some have limitations but not major flaws (low/moderate risk of bias according to NOS scale)</li> <li>• Summary effect estimate P value &lt; 10<sup>-3</sup></li> <li>• The 95% predictive interval is wide</li> </ul>                                                                                                                                                                                                                                                                                                                                                                                                                                                                                                                                                                                                                                                                                                                                                                                                                                                                                                                                                                                                                                                                                                                                                                                             |
| <p>Finally, we rated the evidence to be “low (limited, not conclusive)” when the true effect may be substantially different from the estimate of its effect. “Low/limited-suggestive evidence” represents too limited evidence to conclude on a probable or convincing causal association, but where there is evidence suggestive of a direction of effect. “Low/limited-not conclusive evidence” consists of information that is so limited that no firm conclusion can be made for several reasons (e.g., the evidence might be limited by the amount of evidence in terms of the number of studies available, by inconsistency of direction of effect, by poor quality of studies, or by any combination of these factors). For example, evidence might be judged as “low quality” if any of the following apply:</p> <ul style="list-style-type: none"> <li>• There is only one study or studies have major methodological flaws (high risk of bias according to NOS scale)</li> <li>• Summary effect estimate P value &lt; 0.05</li> <li>• There is considerable variation between study results</li> <li>• The confidence interval of the summary estimate of the effect is very wide (95% predictive interval including null value or 95% predictive interval was inestimable e.g. less than 3 studies)</li> <li>• Small study effects (sometimes called “publication bias”)</li> </ul>                                                                                                                                                                                                                                                                                                                                                                                                          |

Certainty of the evidence and reasons for each outcome of interest.

| Outcomes of interest                                      | Certainty of the evidence and reason                                                                                   |
|-----------------------------------------------------------|------------------------------------------------------------------------------------------------------------------------|
| <b>Primary outcome of all cancer</b>                      |                                                                                                                        |
| All-cause mortality, ASD both                             | ○○○<br>Moderate confidence (probable)<br>Downgraded: (-1) heterogeneity                                                |
| All-cause mortality, ASD male                             | ○○<br>Low confidence (limited-suggestive)<br>Downgraded: (-1) heterogeneity; (-1) 95% prediction interval wide         |
| All-cause mortality, ASD female                           | ○○<br>Low confidence (limited-suggestive)<br>Downgraded: (-1) heterogeneity; (-1) 95% prediction interval wide         |
| All-cause mortality, ADHD both                            | ○○<br>Low confidence (limited-suggestive)<br>Downgraded: (-1) heterogeneity; (-1) 95% prediction interval wide         |
| All-cause mortality, ADHD male                            | ○○<br>Low confidence (limited-suggestive)<br>Downgraded: (-1) heterogeneity; (-1) 95% prediction interval wide         |
| All-cause mortality, ADHD female                          | ○○<br>Low confidence (limited-suggestive)<br>Downgraded: (-1) heterogeneity; (-1) 95% prediction interval wide         |
| All-cause mortality, ASD first-degree relative (mother)   | ○<br>Very low confidence (very uncertain)<br>Downgraded: (-1) only one study, (-2) 95% prediction interval inestimable |
| All-cause mortality, ASD first-degree relative (siblings) | ○<br>Very low confidence (very uncertain)<br>Downgraded: (-1) only one study, (-2) 95% prediction interval inestimable |
| All-cause mortality, ADHD first-degree relative (mother)  | ○<br>Very low confidence (very uncertain)<br>Downgraded: (-1) only one study, (-2) 95% prediction interval inestimable |
| All-cause mortality, ADHD first-degree relative (father)  | ○<br>Very low confidence (very uncertain)<br>Downgraded: (-1) only one study, (-2) 95% prediction interval inestimable |
| <b>Secondary outcome of site-specific cancer</b>          |                                                                                                                        |
| Natural causes, ASD both                                  | ○○<br>Low confidence (limited-suggestive)<br>Downgraded: (-1) heterogeneity; (-1) 95% prediction interval wide         |
| Natural causes, ASD male                                  | ○○<br>Low confidence (limited-suggestive)<br>Downgraded: (-2) 95% prediction interval inestimable                      |
| Natural causes, ASD female                                | ○○<br>Low confidence (not conclusive)<br>Downgraded: (-1) heterogeneity; (-2) 95% prediction interval inestimable      |
| Natural causes, ADHD both                                 | ○○<br>Low confidence (limited-suggestive)<br>Downgraded: (-1) heterogeneity; (-1) 95% prediction interval wide         |
| Natural causes, ADHD male                                 | ○○<br>Low confidence (limited-suggestive)<br>Downgraded: (-1) heterogeneity; (-1) 95% prediction interval wide         |
| Natural causes, ADHD female                               | ○○<br>Low confidence (limited-suggestive)<br>Downgraded: (-1) heterogeneity; (-1) 95% prediction interval wide         |
| Unnatural causes, ASD both                                | ○○<br>Low confidence (limited-suggestive)<br>Downgraded: (-1) heterogeneity; (-1) 95% prediction interval wide         |
| Unnatural causes, ASD male                                | ○○<br>Low confidence (limited-suggestive)<br>Downgraded: (-1) heterogeneity; (-1) 95% prediction interval wide         |
| Unnatural causes, ASD female                              | ○○<br>Low confidence (limited-suggestive)<br>Downgraded: (-1) heterogeneity; (-1) 95% prediction interval wide         |
| Unnatural causes, ADHD both                               | ○○<br>Low confidence (limited-suggestive)<br>Downgraded: (-1) heterogeneity; (-1) 95% prediction interval wide         |
| Unnatural causes, ADHD male                               | ○○<br>Low confidence (limited-suggestive)<br>Downgraded: (-1) heterogeneity; (-1) 95% prediction interval wide         |
| Unnatural causes, ADHD female                             | ○○<br>Low confidence (limited-suggestive)                                                                              |

| Outcomes of interest                          | Certainty of the evidence and reason                                                                                   |
|-----------------------------------------------|------------------------------------------------------------------------------------------------------------------------|
|                                               | Downgraded: (-1) heterogeneity; (-1) 95% prediction interval wide<br>○                                                 |
| Infections, ASD both                          | Very low confidence (very uncertain)<br>Downgraded: (-1) only one study, (-2) 95% prediction interval inestimable<br>○ |
| Neoplasms, ASD both                           | Low confidence (limited-suggestive)<br>Downgraded: (-1) heterogeneity; (-1) 95% prediction interval very wide<br>○○    |
| Neoplasms, ASD male                           | Very low confidence (very uncertain)<br>Downgraded: (-1) only one study, (-2) 95% prediction interval inestimable<br>○ |
| Neoplasms, ASD female                         | Very low confidence (very uncertain)<br>Downgraded: (-1) only one study, (-2) 95% prediction interval inestimable<br>○ |
| Neoplasms, ASD first-degree relative (mother) | Very low confidence (very uncertain)<br>Downgraded: (-1) only one study, (-2) 95% prediction interval inestimable<br>○ |
| Endocrine, ASD both                           | Very low confidence (very uncertain)<br>Downgraded: (-1) only one study, (-2) 95% prediction interval inestimable<br>○ |
| Endocrine, ASD male                           | Very low confidence (very uncertain)<br>Downgraded: (-1) only one study, (-2) 95% prediction interval inestimable<br>○ |
| Endocrine, ASD female                         | Very low confidence (very uncertain)<br>Downgraded: (-1) only one study, (-2) 95% prediction interval inestimable<br>○ |
| Mental and behavioural disorders, ASD both    | Very low confidence (very uncertain)<br>Downgraded: (-1) only one study, (-2) 95% prediction interval inestimable<br>○ |
| Mental and behavioural disorders, ASD male    | Very low confidence (very uncertain)<br>Downgraded: (-1) only one study, (-2) 95% prediction interval inestimable<br>○ |
| Mental and behavioural disorders, ASD female  | Very low confidence (very uncertain)<br>Downgraded: (-1) only one study, (-2) 95% prediction interval inestimable<br>○ |
| Nervous system, ASD both                      | Low confidence (limited-suggestive)<br>Downgraded: (-1) heterogeneity; (-1) 95% prediction interval wide<br>○○         |
| Nervous system, ASD male                      | Very low confidence (very uncertain)<br>Downgraded: (-1) only one study, (-2) 95% prediction interval inestimable<br>○ |
| Nervous system, ASD female                    | Very low confidence (very uncertain)<br>Downgraded: (-1) only one study, (-2) 95% prediction interval inestimable<br>○ |
| Circulatory system, ASD both                  | Very low confidence (very uncertain)<br>Downgraded: (-1) only one study, (-2) 95% prediction interval inestimable<br>○ |
| Circulatory system, ASD male                  | Very low confidence (very uncertain)<br>Downgraded: (-1) only one study, (-2) 95% prediction interval inestimable<br>○ |
| Circulatory system, ASD female                | Very low confidence (very uncertain)<br>Downgraded: (-1) only one study, (-2) 95% prediction interval inestimable<br>○ |
| Respiratory system, ASD both                  | Low confidence (limited-suggestive)<br>Downgraded: (-1) heterogeneity; (-1) 95% prediction interval wide<br>○○         |
| Respiratory system, ASD male                  | Very low confidence (very uncertain)<br>Downgraded: (-1) only one study, (-2) 95% prediction interval inestimable<br>○ |
| Respiratory system, ASD female                | Very low confidence (very uncertain)<br>Downgraded: (-1) only one study, (-2) 95% prediction interval inestimable<br>○ |
| Digestive system, ASD both                    | Low confidence (limited-suggestive)<br>Downgraded: (-1) heterogeneity; (-1) 95% prediction interval very wide<br>○○    |
| Digestive system, ASD male                    | Very low confidence (very uncertain)<br>Downgraded: (-1) only one study, (-2) 95% prediction interval inestimable<br>○ |
| Digestive system, ASD female                  | Very low confidence (very uncertain)<br>○                                                                              |

| Outcomes of interest                                | Certainty of the evidence and reason                                                                                                                                                                |
|-----------------------------------------------------|-----------------------------------------------------------------------------------------------------------------------------------------------------------------------------------------------------|
|                                                     | Downgraded: (-1) only one study, (-2) 95% prediction interval inestimable                                                                                                                           |
| Genitourinary system, ASD both                      | <p style="text-align: right;">○</p> <p style="text-align: right;">Very low confidence (very uncertain)</p> <p>Downgraded: (-1) only one study, (-2) 95% prediction interval inestimable</p>         |
| Congenital malformations, ASD both                  | <p style="text-align: right;">○○</p> <p style="text-align: right;">Low confidence (limited-suggestive)</p> <p>Downgraded: (-1) heterogeneity; (-1) 95% prediction interval wide</p>                 |
| Congenital malformations, ASD male                  | <p style="text-align: right;">○</p> <p style="text-align: right;">Very low confidence (very uncertain)</p> <p>Downgraded: (-1) only one study, (-2) 95% prediction interval inestimable</p>         |
| Congenital malformations, ASD female                | <p style="text-align: right;">○</p> <p style="text-align: right;">Very low confidence (very uncertain)</p> <p>Downgraded: (-1) only one study, (-2) 95% prediction interval inestimable</p>         |
| External causes, ASD first-degree relative (mother) | <p style="text-align: right;">○</p> <p style="text-align: right;">Very low confidence (limited-not conclusive)</p> <p>Downgraded: (-1) only one study, (-2) 95% prediction interval inestimable</p> |
| External causes, ASD first-degree relative (father) | <p style="text-align: right;">○</p> <p style="text-align: right;">Very low confidence (limited-not conclusive)</p> <p>Downgraded: (-1) only one study, (-2) 95% prediction interval inestimable</p> |

**eTable 12. Summary statistics of risk of mortality in people with ASD/ADHD people.**

| Outcomes of interest                                      | No of studies | Participants with ASD or ADHD, No. | Death cases, No. | Pooled RR (95% CI) | RR largest study (95% CI) | P value for Effect Estimate | I <sup>2</sup> (95% CI) | 95% prediction interval   | P value for heterogeneity | Confidence                   |
|-----------------------------------------------------------|---------------|------------------------------------|------------------|--------------------|---------------------------|-----------------------------|-------------------------|---------------------------|---------------------------|------------------------------|
| <b>Primary outcome, all-cause mortality</b>               |               |                                    |                  |                    |                           |                             |                         |                           |                           |                              |
| All-cause mortality, ASD both                             | 12            | 154238                             | 2017             | 2.37 (1.97-2.85)   | 2.06 (1.64-2.58)          | <.001                       | 89 (82-93)              | 1.25-4.48                 | < .001                    | Moderate (probable)          |
| All-cause mortality, ASD male                             | 8             | 75085                              | 1071             | 2.09 (1.50-2.92)   | 1.25 (1.08-1.45)          | <.001                       | 94 (90-96)              | 0.68-6.40                 | < .001                    | Low (limited-suggestive)     |
| All-cause mortality, ASD female                           | 8             | 25338                              | 562              | 4.87 (3.07-7.73)   | 2.75 (2.09-3.64)          | <.001                       | 91 (85-95)              | 1.09-21.78                | < .001                    | Low (limited-suggestive)     |
| All-cause mortality, ADHD both                            | 8             | 396488                             | 1302             | 2.13 (1.13-4.02)   | 1.07 (1.00-1.17)          | .020                        | 98 (97-99)              | 0.28-16.42                | < .001                    | Low (limited-suggestive)     |
| All-cause mortality, ADHD male                            | 5             | 291201                             | 982              | 2.43 (1.01-5.83)   | 1.04 (0.94-1.14)          | .046                        | 99 (98-99)              | 0.10-58.40                | < .001                    | Low (limited-suggestive)     |
| All-cause mortality, ADHD female                          | 4             | 103839                             | 302              | 2.84 (1.02-7.89)   | 1.24 (1.04-1.48)          | .045                        | 97 (96-99)              | 0.03-277.30               | < .001                    | Low (limited-suggestive)     |
| All-cause mortality, ASD first-degree relative (mother)   | 1             | 2041                               | 24               | NA                 | 1.60 (1.06-2.40)          | .024                        | NA                      | NA                        | NA                        | Very low (very uncertain)    |
| All-cause mortality, ASD first-degree relative (siblings) | 1             | 173                                | 2                | NA                 | 1.19 (0.28-4.98)          | .813                        | NA                      | NA                        | NA                        | Very low (very uncertain)    |
| All-cause mortality, ADHD first-degree relative (mother)  | 1             | 158                                | 2                | NA                 | 2.56 (0.12-52.75)         | .545                        | NA                      | NA                        | NA                        | Very low (very uncertain)    |
| All-cause mortality, ADHD first-degree relative (father)  | 1             | 158                                | 1                | NA                 | 1.54 (0.06-37.32)         | .792                        | NA                      | NA                        | NA                        | Very low (very uncertain)    |
| <b>Secondary outcomes, cause-specific mortality</b>       |               |                                    |                  |                    |                           |                             |                         |                           |                           |                              |
| Natural causes, ASD both                                  | 4             | 65421                              | 613              | 3.80 (2.06-7.01)   | 2.59 (2.36-2.85)          | <.001                       | 96 (92-98)              | 0.22-66.96                | < .001                    | Low (limited-suggestive)     |
| Natural causes, ASD male                                  | 2             | 22430                              | 256              | 2.95 (2.35-3.69)   | 2.85 (2.50-3.24)          | <.001                       | 10 (NA)                 | NA                        | .290                      | Low (limited-suggestive)     |
| Natural causes, ASD female                                | 2             | 9387                               | 220              | 6.57 (0.60-71.91)  | 2.44 (2.12-2.80)          | .123                        | 79 (NA)                 | NA                        | .028                      | Low (limited-not conclusive) |
| Natural causes, ADHD both                                 | 4             | 394833                             | 516              | 1.62 (0.89-2.96)   | 0.91 (0.80-1.15)          | .117                        | 88 (72-95)              | 0.11-23.10                | < .001                    | Low (limited-not conclusive) |
| Natural causes, ADHD male                                 | 3             | 290908                             | 348              | 1.22 (0.74-2.01)   | 0.83 (0.72-1.15)          | .428                        | 80 (36-94)              | 0.00-451.06               | .007                      | Low (limited-not conclusive) |
| Natural causes, ADHD female                               | 3             | 103803                             | 138              | 2.02 (0.91-4.48)   | 1.03 (0.82-1.30)          | .085                        | 91 (77-97)              | 0.00-39.6x10 <sup>3</sup> | < .001                    | Low (limited-not conclusive) |
| Unnatural causes, ASD both                                | 6             | 117345                             | 318              | 2.50 (1.49-4.18)   | 3.75 (2.85-4.92)          | .001                        | 95 (92-97)              | 0.38-16.35                | < .001                    | Low (limited-suggestive)     |
| Unnatural causes, ASD male                                | 4             | 61031                              | 182              | 1.94 (0.83-4.49)   | 3.48 (2.57-4.74)          | .124                        | 96 (94-98)              | 0.03-112.04               | < .001                    | Low (limited-not conclusive) |
| Unnatural causes, ASD female                              | 4             | 22712                              | 58               | 3.61 (1.71-7.60)   | 2.63 (1.46-4.76)          | .001                        | 79 (45-92)              | 0.15-88.22                | .002                      | Low (limited-suggestive)     |
| Unnatural causes, ADHD both                               | 10            | 432900                             | 847              | 2.81 (1.73-4.55)   | 1.51 (1.51-1.72)          | <.001                       | 92 (88-95)              | 0.61-12.91                | < .001                    | Low (limited-suggestive)     |
| Unnatural causes, ADHD male                               | 5             | 316851                             | NA               | 2.49 (1.36-4.56)   | 1.45 (1.25-1.67)          | .003                        | 97 (96-98)              | 0.23-26.59                | < .001                    | Low (limited-suggestive)     |
| Unnatural causes, ADHD female                             | 5             | 114816                             | NA               | 2.98 (1.46-6.10)   | 1.82 (1.32-2.51)          | .003                        | 92 (85-96)              | 0.20-44.17                | < .001                    | Low (limited-suggestive)     |
| Infections, ASD both                                      | 1             | 27122                              | 5                | NA                 | 1.83 (0.75-4.30)          | .175                        | NA                      | NA                        | NA                        | Very low (very uncertain)    |
| Neoplasms, ASD both                                       | 2             | 40233                              | 109              | 2.05 (1.46-2.87)   | 1.80 (1.46-2.23)          | < .001                      | 53 (NA)                 | NA                        | .143                      | Low (limited-suggestive)     |

| Outcomes of interest                          | No of studies | Participants with ASD or ADHD, No. | Death cases, No. | Pooled RR (95% CI) | RR largest study (95% CI) | P value for Effect Estimate | I <sup>2</sup> (95% CI) | 95% prediction interval | P value for heterogeneity | Confidence                |
|-----------------------------------------------|---------------|------------------------------------|------------------|--------------------|---------------------------|-----------------------------|-------------------------|-------------------------|---------------------------|---------------------------|
| Neoplasms, ASD male                           | 1             | 18693                              | 48               | NA                 | 1.79 (1.34-2.39)          | < .001                      | NA                      | NA                      | NA                        | Very low (very uncertain) |
| Neoplasms, ASD female                         | 1             | 8429                               | 40               | NA                 | 1.83 (1.33-2.51)          | < .001                      | NA                      | NA                      | NA                        | Very low (very uncertain) |
| Neoplasms, ASD first-degree relative (mother) | 1             | 2041                               | 10               | NA                 | 1.54 (0.80-2.90)          | .189                        | NA                      | NA                      | NA                        | Very low (very uncertain) |
| Endocrine, ASD both                           | 1             | 27122                              | 19               | NA                 | 3.70 (2.34-5.87)          | < .001                      | NA                      | NA                      | NA                        | Very low (very uncertain) |
| Endocrine, ASD male                           | 1             | 18693                              | 6                | NA                 | 2.11 (0.94-4.73)          | .070                        | NA                      | NA                      | NA                        | Very low (very uncertain) |
| Endocrine, ASD female                         | 1             | 8429                               | 3                | NA                 | 5.70 (3.25-9.99)          | < .001                      | NA                      | NA                      | NA                        | Very low (very uncertain) |
| Mental and behavioural disorders, ASD both    | 1             | 27122                              | 30               | NA                 | 2.80 (1.94-4.03)          | < .001                      | NA                      | NA                      | NA                        | Very low (very uncertain) |
| Mental and behavioural disorders, ASD male    | 1             | 18693                              | 12               | NA                 | 3.31 (1.85-5.92)          | < .001                      | NA                      | NA                      | NA                        | Very low (very uncertain) |
| Mental and behavioural disorders, ASD female  | 1             | 8429                               | 18               | NA                 | 2.53 (1.58-4.05)          | < .001                      | NA                      | NA                      | NA                        | Very low (very uncertain) |
| Nervous system, ASD both                      | 4             | 61066                              | 102              | 10.79 (5.42-21.10) | 7.49 (5.78-9.72)          | < .001                      | 85 (64-94)              | 0.52-219.57             | < .001                    | Low (limited-suggestive)  |
| Nervous system, ASD male                      | 1             | 18693                              | 38               | NA                 | 10.19 (7.27-14.29)        | < .001                      | NA                      | NA                      | NA                        | Very low (very uncertain) |
| Nervous system, ASD female                    | 1             | 8429                               | 24               | NA                 | 5.29 (3.50-7.99)          | < .001                      | NA                      | NA                      | NA                        | Very low (very uncertain) |
| Circulatory system, ASD both                  | 1             | 27122                              | 157              | NA                 | 1.49 (1.27-1.75)          | <.001                       | NA                      | NA                      | NA                        | Very low (very uncertain) |
| Circulatory system, ASD male                  | 1             | 18693                              | 91               | NA                 | 2.02 (1.64-2.49)          | <.001                       | NA                      | NA                      | NA                        | Very low (very uncertain) |
| Circulatory system, ASD female                | 1             | 8429                               | 66               | NA                 | 1.10 (0.86-1.40)          | .443                        | NA                      | NA                      | NA                        | Very low (very uncertain) |
| Respiratory system, ASD both                  | 2             | 40233                              | 62               | 3.87 (1.80-8.32)   | 2.68 (1.99-3.62)          | .001                        | 86 (NA)                 | NA                      | .007                      | Low (limited-suggestive)  |
| Respiratory system, ASD male                  | 1             | 18693                              | 19               | NA                 | 2.16 (1.36-3.43)          | .001                        | NA                      | NA                      | NA                        | Very low (very uncertain) |
| Respiratory system, ASD female                | 1             | 8429                               | 26               | NA                 | 3.24 (2.19-4.80)          | <.001                       | NA                      | NA                      | NA                        | Very low (very uncertain) |
| Digestive system, ASD both                    | 2             | 40233                              | 40               | 4.59 (2.29-9.19)   | 3.31 (2.25-4.87)          | <.001                       | 76 (NA)                 | NA                      | .039                      | Low (limited-suggestive)  |
| Digestive system, ASD male                    | 1             | 18693                              | 16               | NA                 | 3.81 (2.31-6.29)          | <.001                       | NA                      | NA                      | NA                        | Very low (very uncertain) |
| Digestive system, ASD female                  | 1             | 8429                               | 11               | NA                 | 2.78 (1.52-5.07)          | .001                        | NA                      | NA                      | NA                        | Very low (very uncertain) |

| Outcomes of interest                                | No of studies | Participants with ASD or ADHD, No. | Death cases, No. | Pooled RR (95% CI) | RR largest study (95% CI) | P value for Effect Estimate | I <sup>2</sup> (95% CI) | 95% prediction interval | P value for heterogeneity | Confidence                |
|-----------------------------------------------------|---------------|------------------------------------|------------------|--------------------|---------------------------|-----------------------------|-------------------------|-------------------------|---------------------------|---------------------------|
| Genitourinary system, ASD both                      | 1             | 27122                              | 12               | NA                 | 3.82 (2.13-6.84)          | <.001                       | NA                      | NA                      | NA                        | Very low (very uncertain) |
| Congenital malformations, ASD both                  | 2             | 40233                              | 37               | 11.74 (4.49-30.74) | 19.10 (11.94-30.55)       | < .001                      | 87 (NA)                 | NA                      | .005                      | Low (limited-suggestive)  |
| Congenital malformations, ASD male                  | 1             | 18693                              | 8                | NA                 | 11.07 (5.30-23.13)        | < .001                      | NA                      | NA                      | NA                        | Very low (very uncertain) |
| Congenital malformations, ASD female                | 1             | 8429                               | 13               | NA                 | 33.86 (18.04-63.56)       | < .001                      | NA                      | NA                      | NA                        | Very low (very uncertain) |
| External causes, ASD first-degree relative (mother) | 1             | 158                                | 1                | NA                 | 1.54 (0.06-37.32)         | .792                        | NA                      | NA                      | NA                        | Very low (very uncertain) |
| External causes, ASD first-degree relative (father) | 1             | 158                                | 2                | NA                 | 2.56 (0.12-52.75)         | .545                        | NA                      | NA                      | NA                        | Very low (very uncertain) |

Note: Predictive intervals were inestimable with less than 3 studies.



**eFigure 1. Secondary outcome. Unnatural causes of death among ASD/ADHD people.**

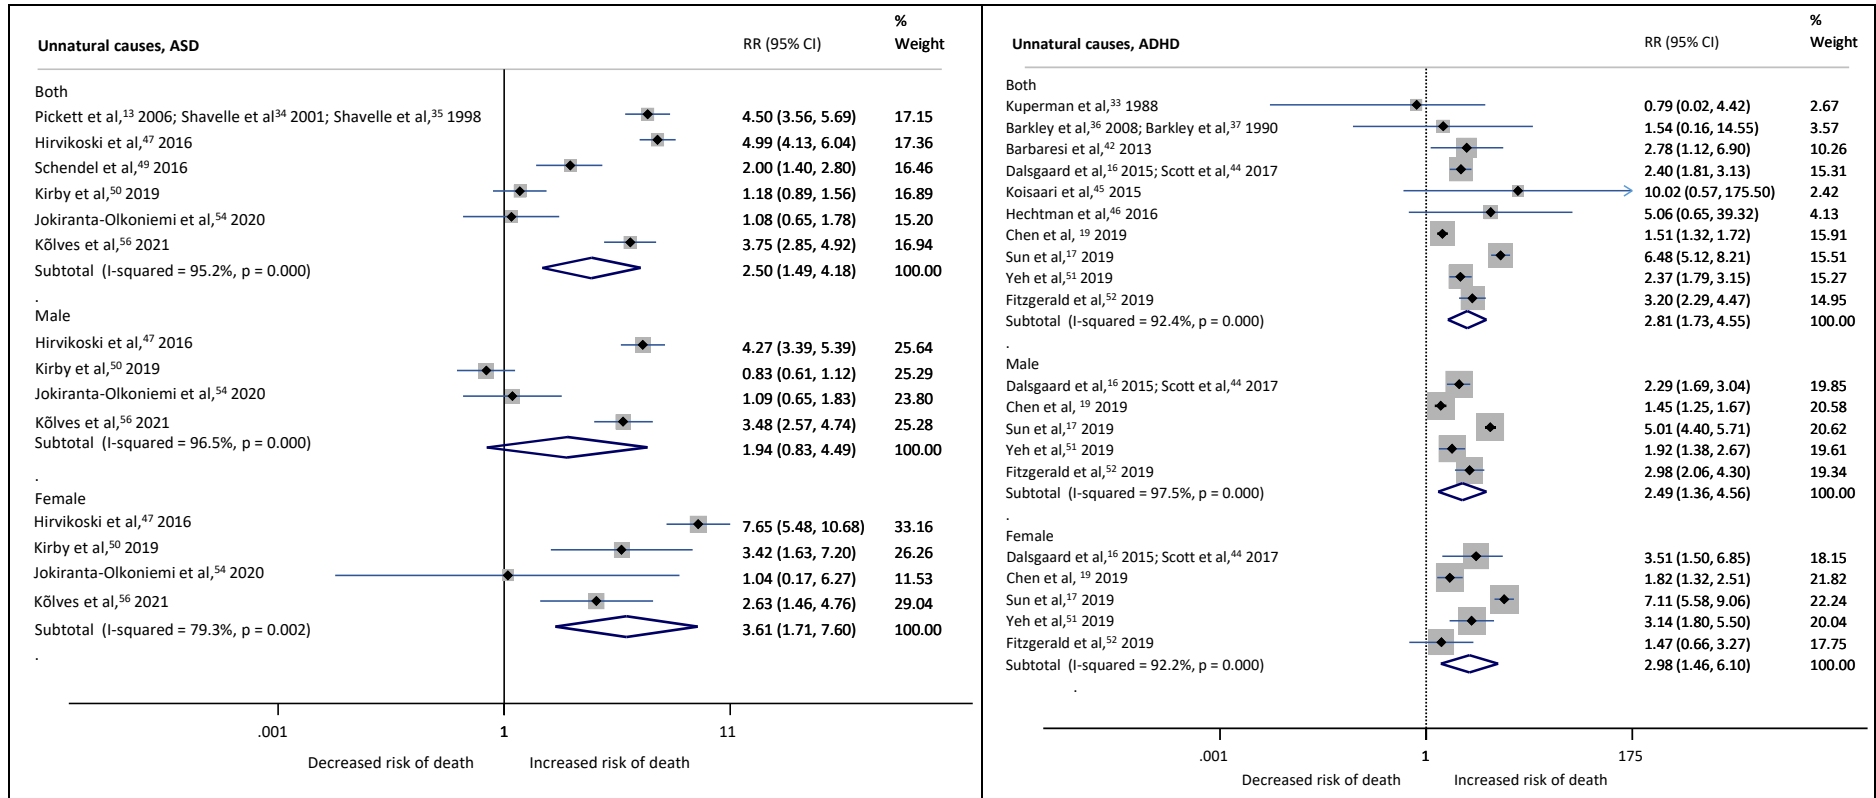

**eFigure 2. Secondary outcome. Natural causes of death among ASD/ADHD people.**

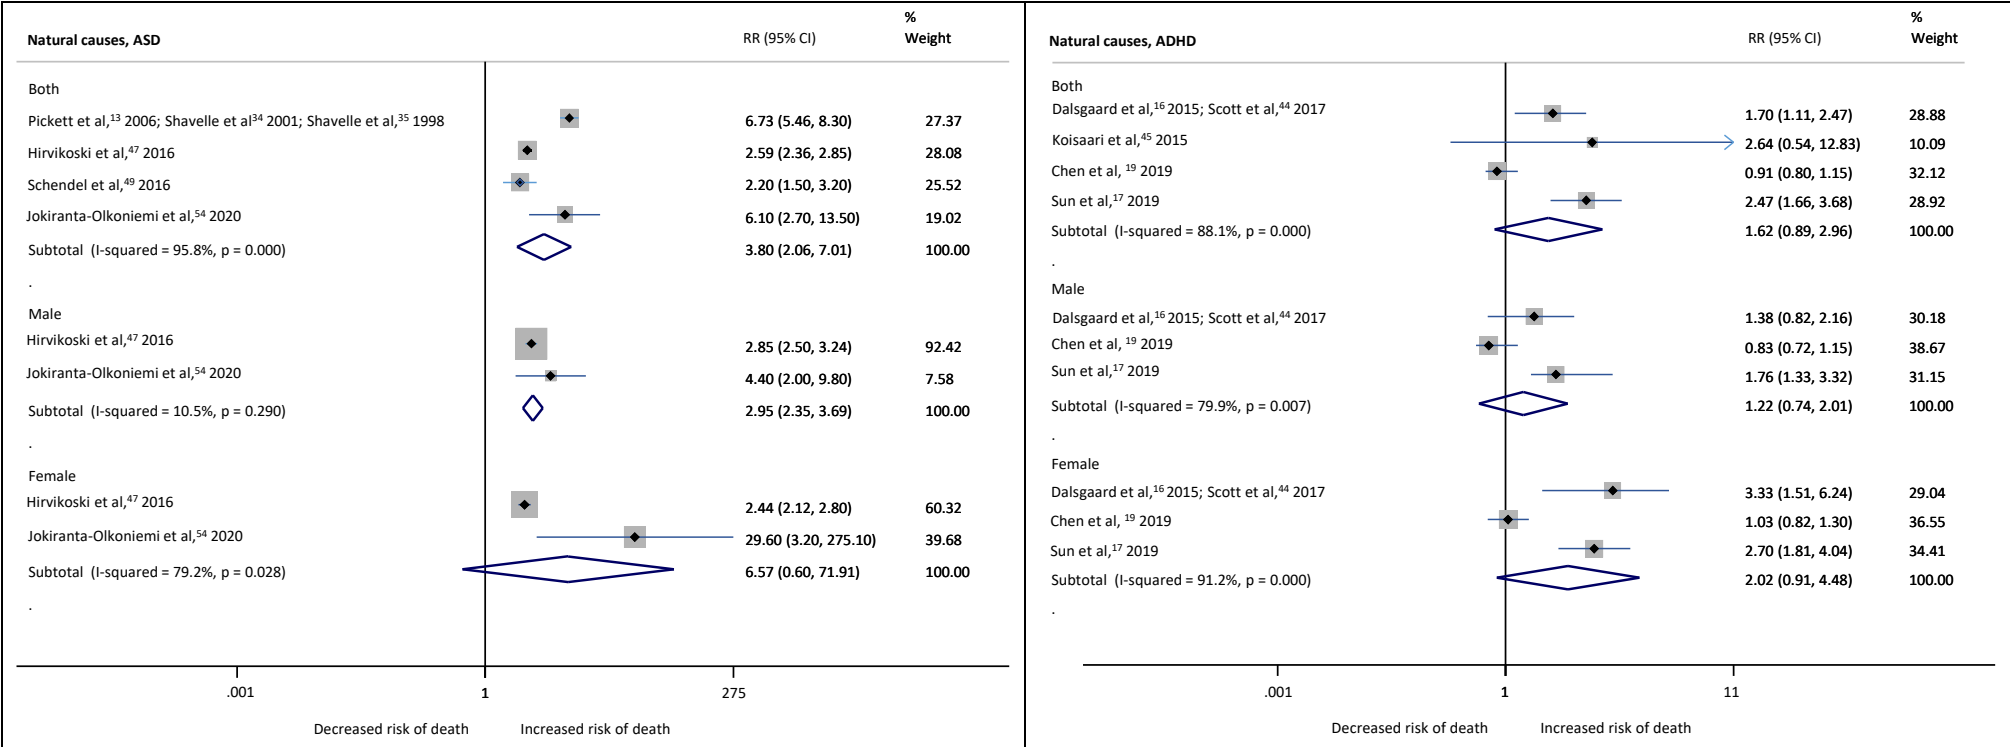

**eFigure 3. Secondary outcome. Deaths caused by nervous system disorders among ASD people.**

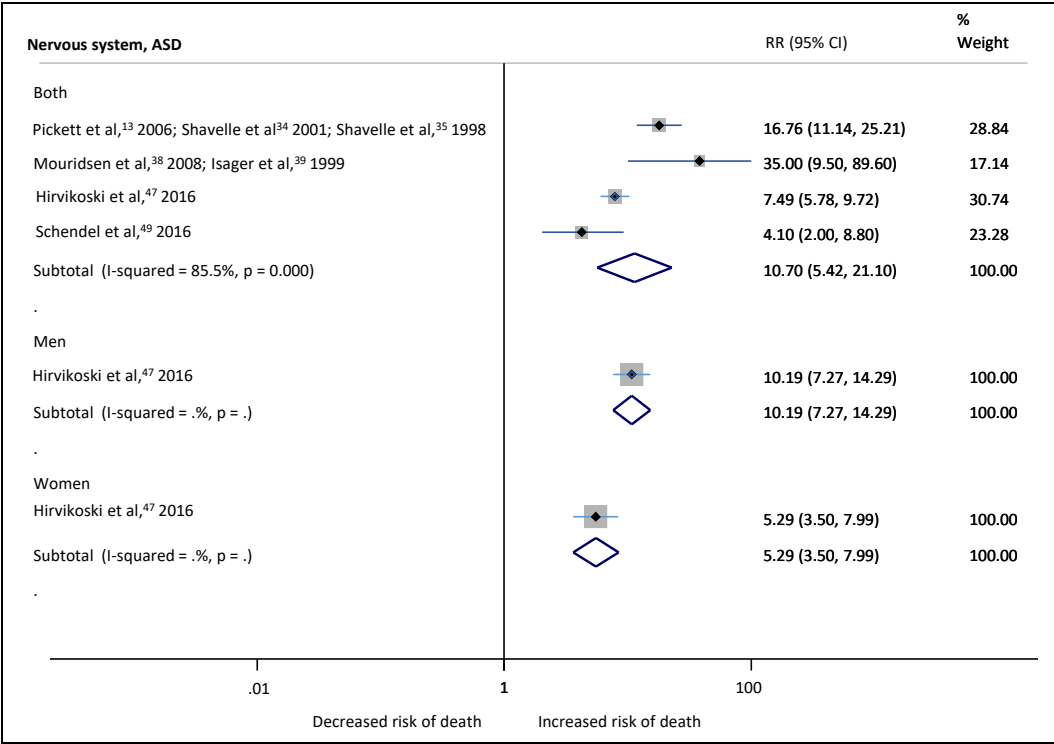

**eFigure 4. Secondary outcome. Deaths caused by neoplasms among ASD people.**

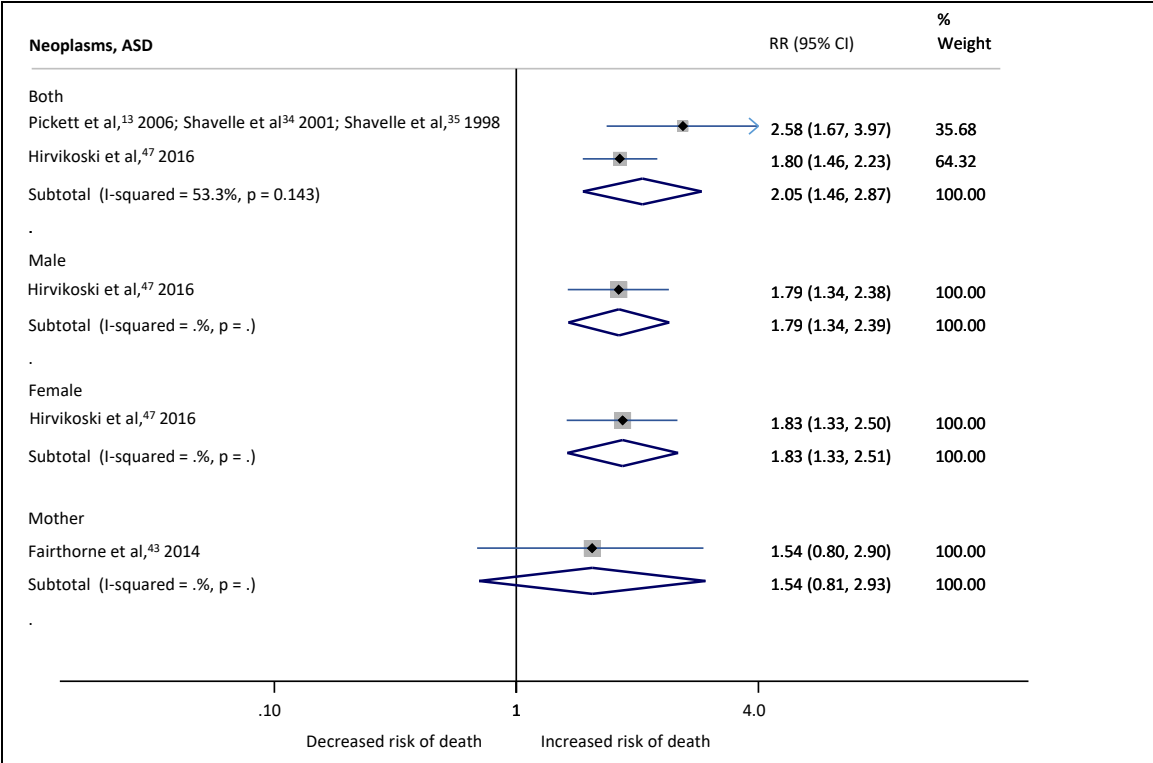

**eFigure 5. Secondary outcome. Deaths caused by respiratory system diseases among ASD people.**

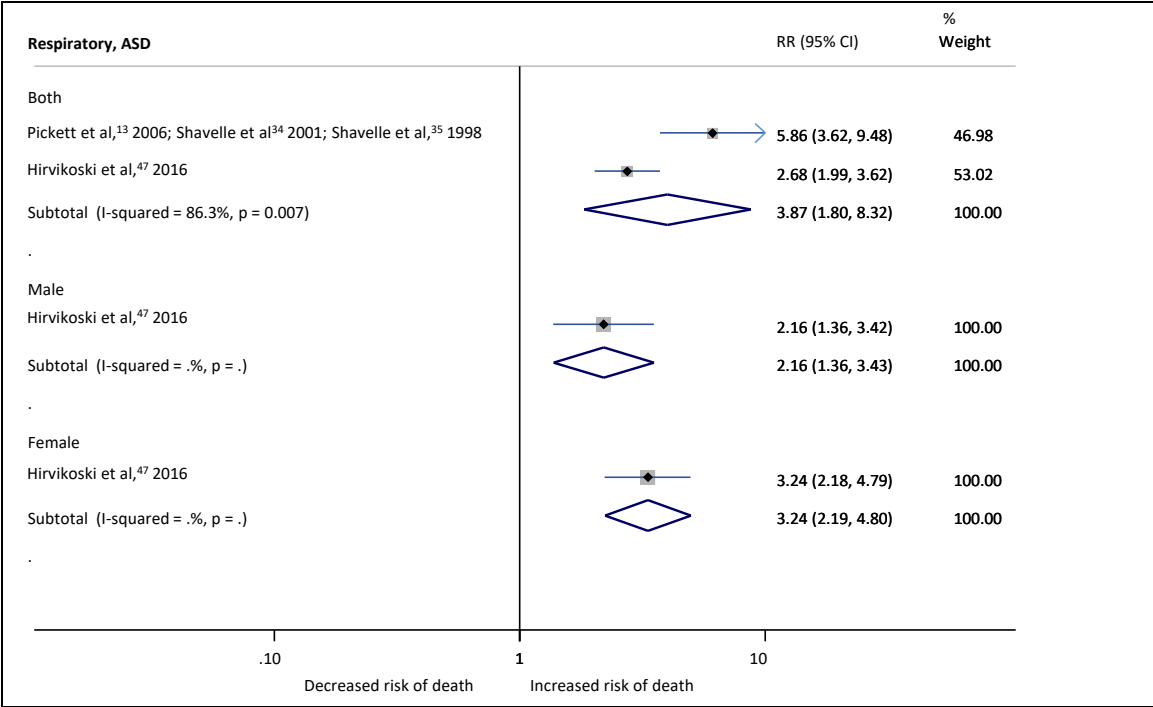

**eFigure 6. Secondary outcome. Deaths caused by digestive system diseases among ASD people.**

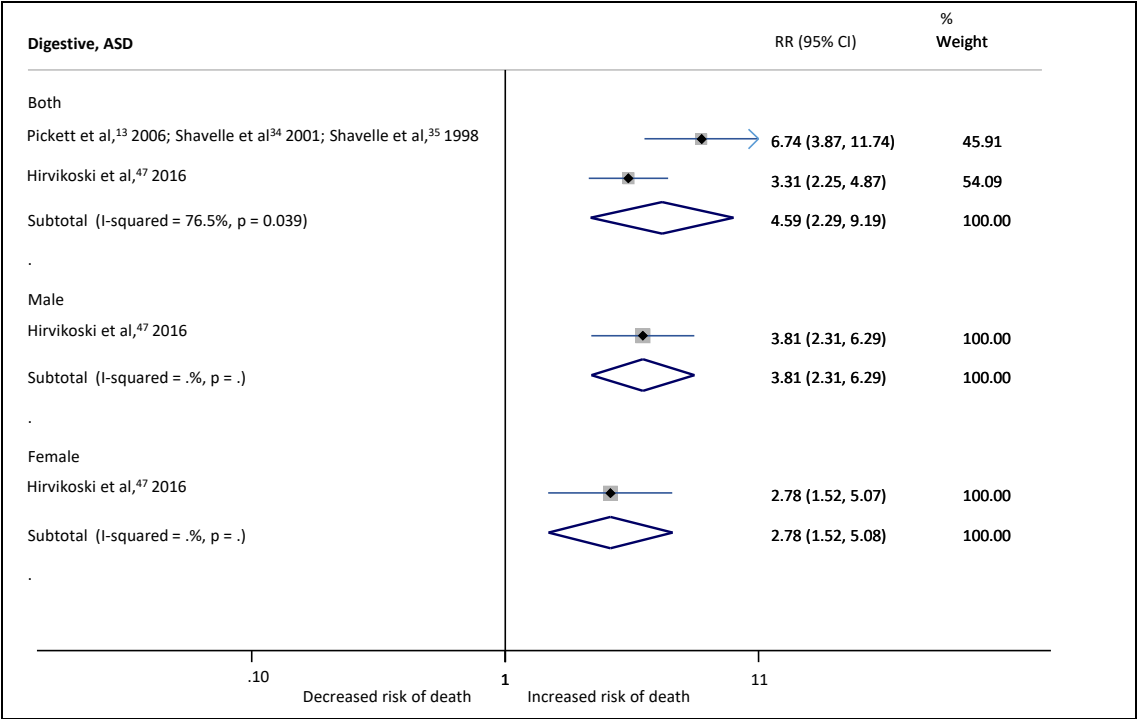

**eFigure 7. Secondary outcome. Deaths caused by congenital malformations among ASD people.**

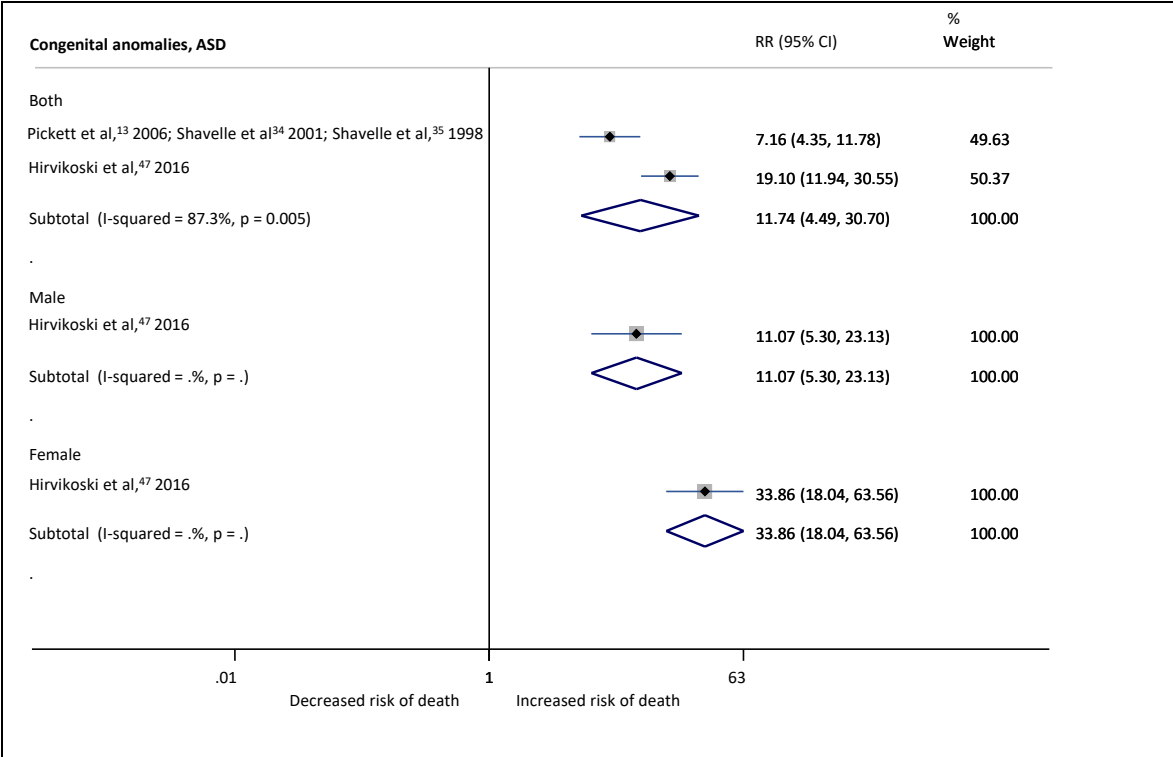

**eFigure 8. Subgroup analyses. ASD comorbidity and all-cause mortality among ASD people.**

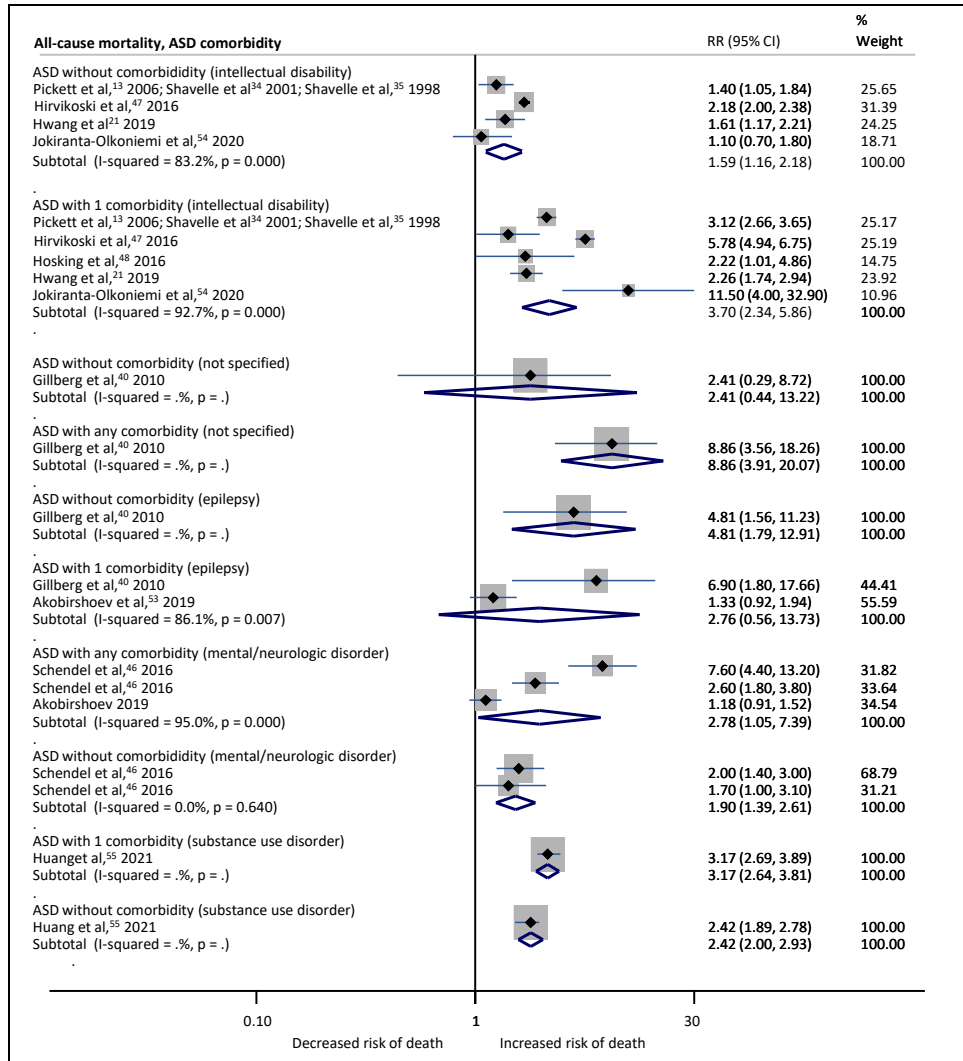



**eFigure 9. Subgroup analyses. ADHD comorbidity and all-cause mortality among ADHD people.**

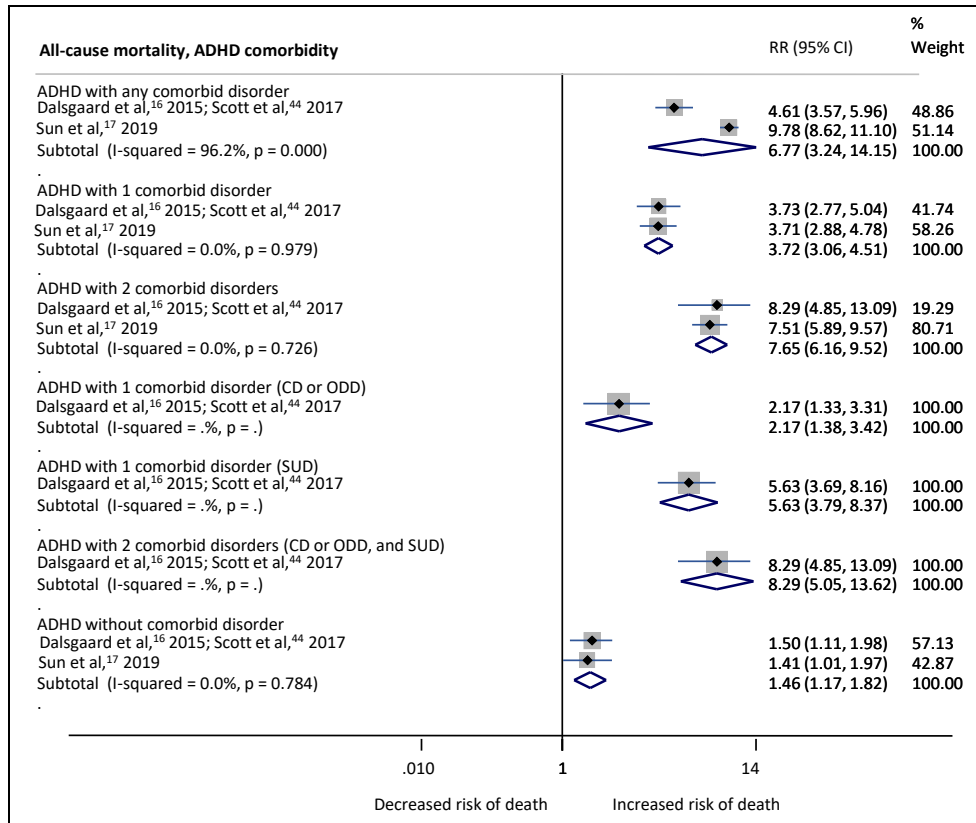

**eFigure 10. Subgroup analyses. Age group at first diagnosis and all-cause mortality among ASD people.**

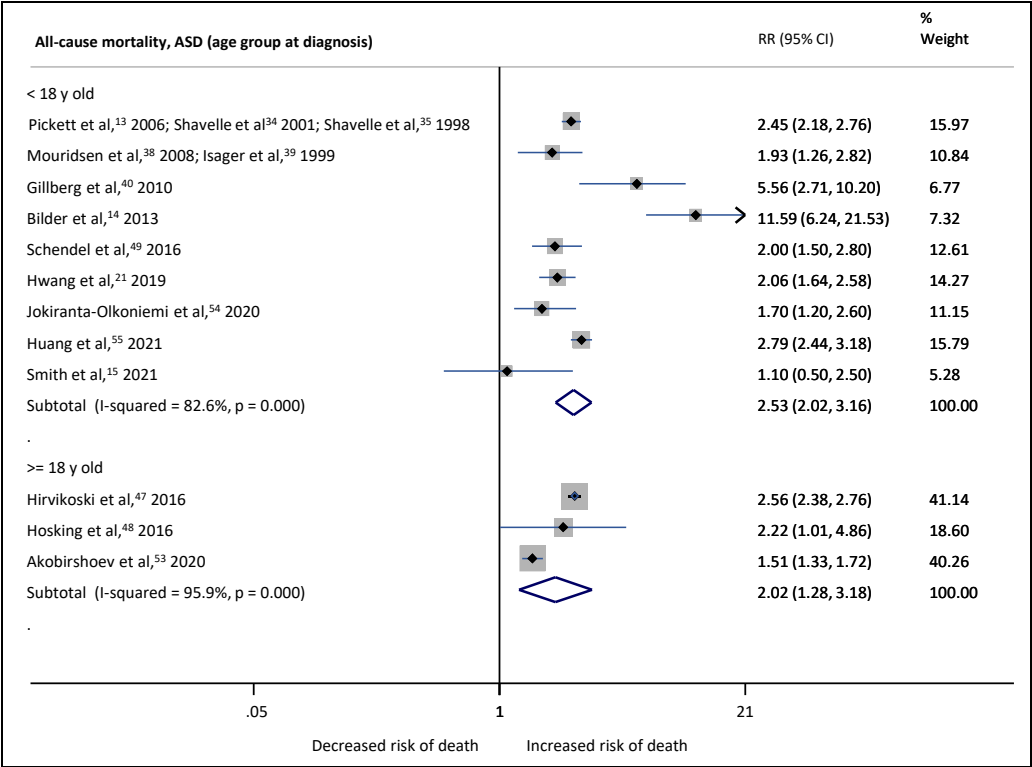

**eFigure 11. Subgroup analyses. Age group at first diagnosis and all-cause mortality among ADHD people.**

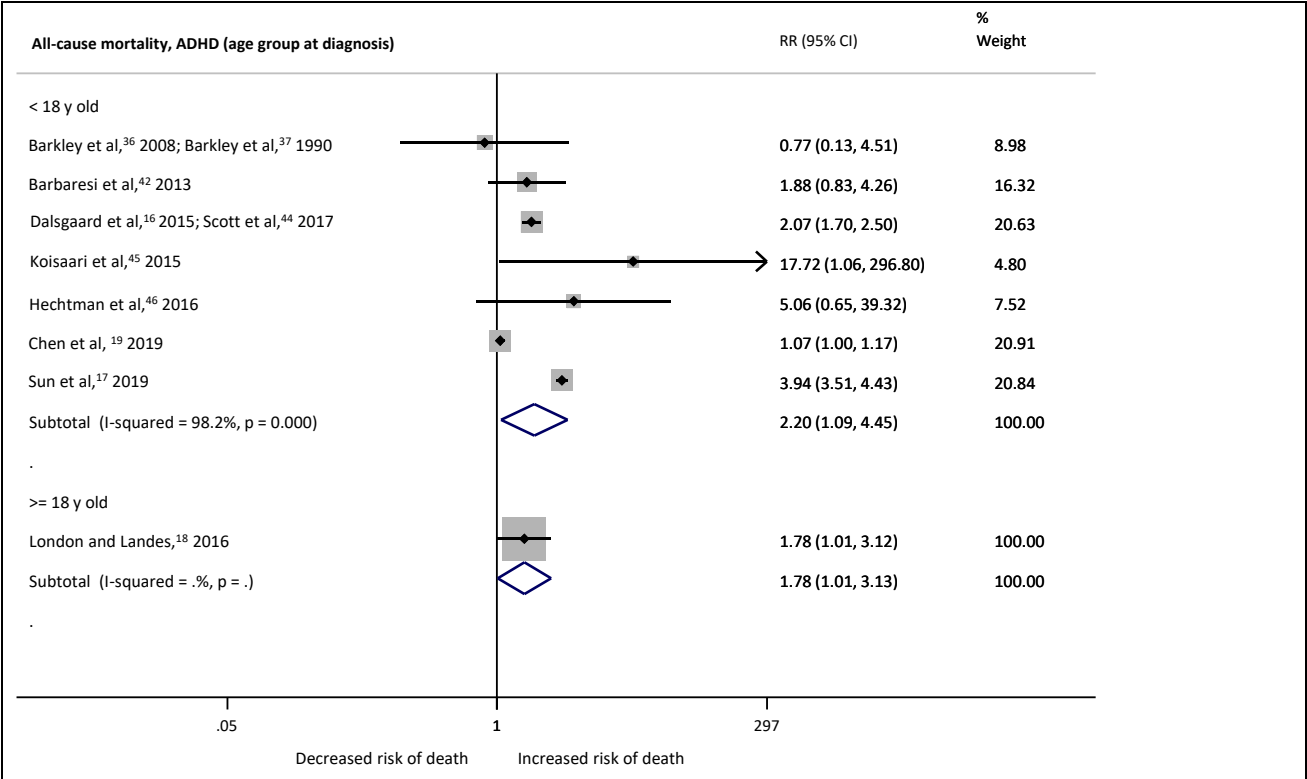

**eFigure 12. Subgroup analyses. Cohort/sample size and and all-cause mortality among ASD people.**

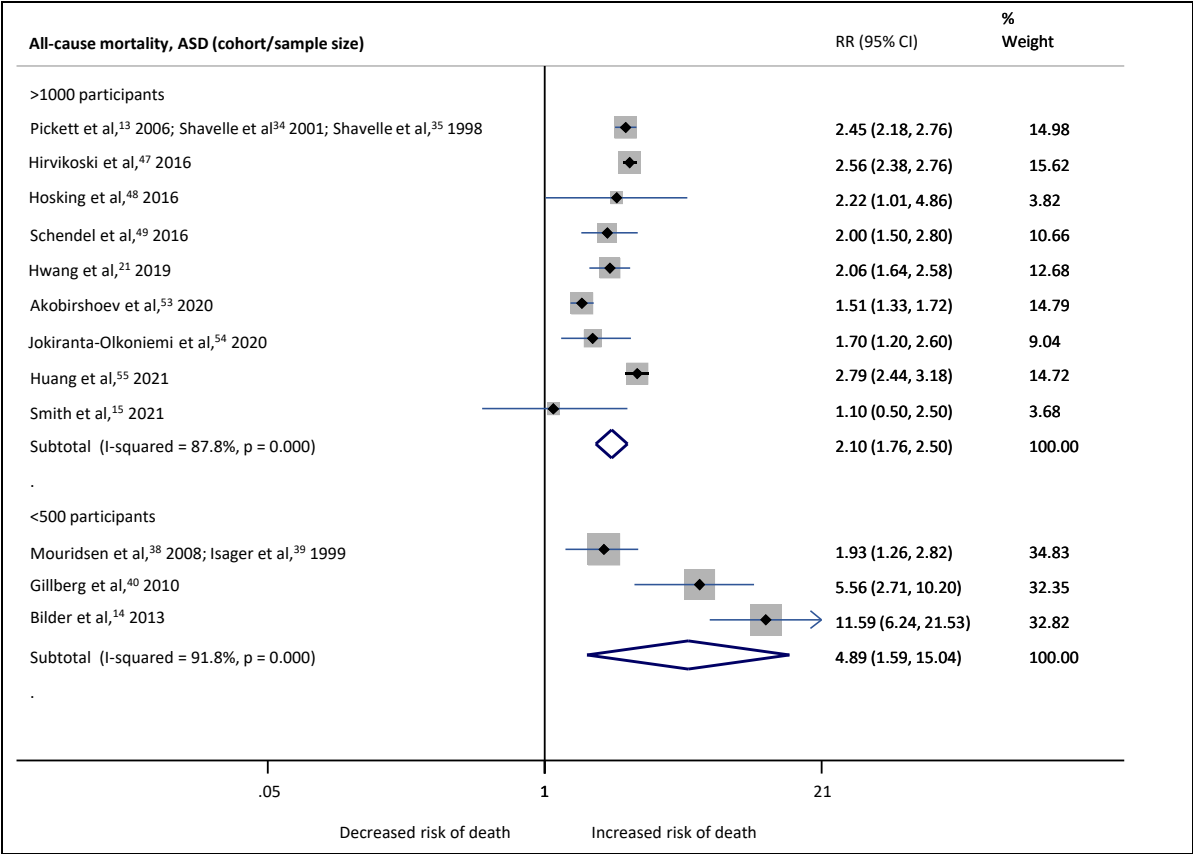

**eFigure 13. Subgroup analyses. Cohort/sample size and and all-cause mortality among ADHD people.**

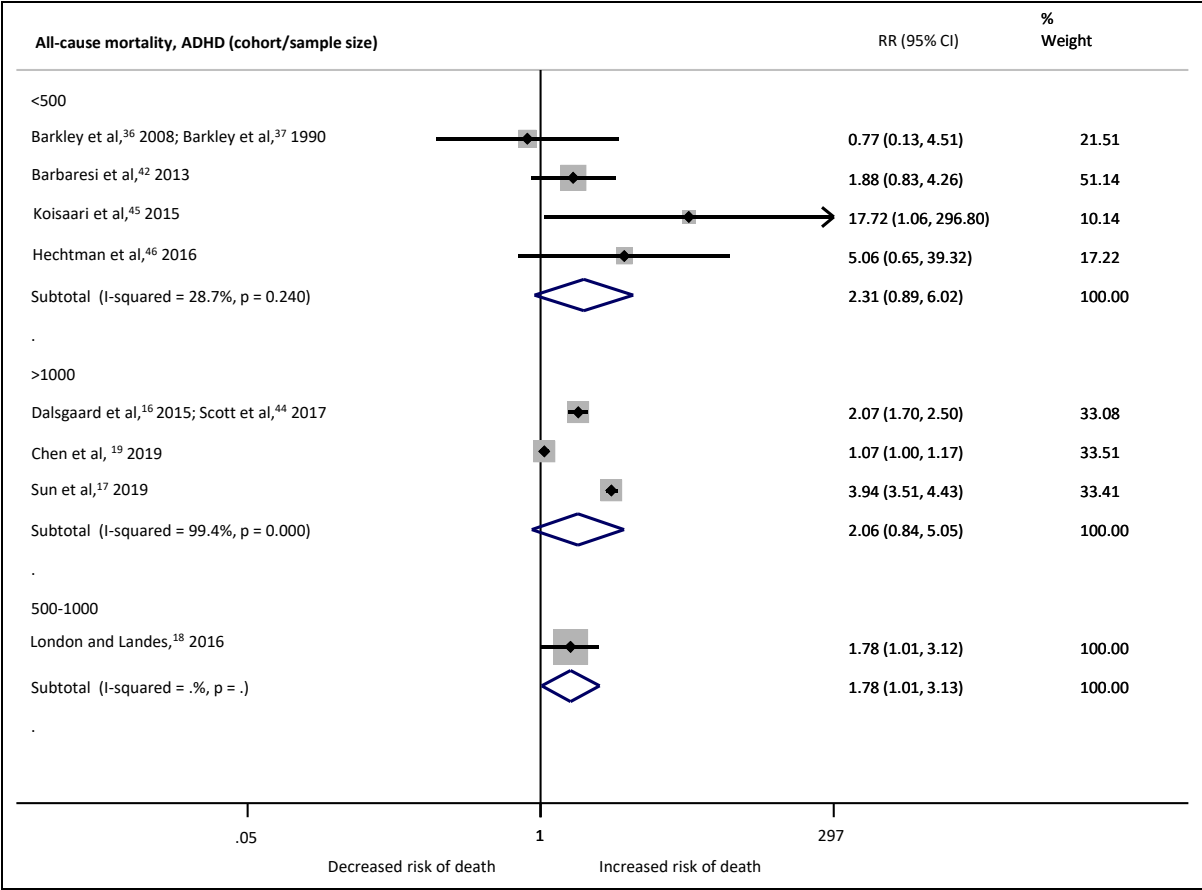

**eFigure 14. Subgroup analyses. Setting and all-cause mortality among ASD people.**

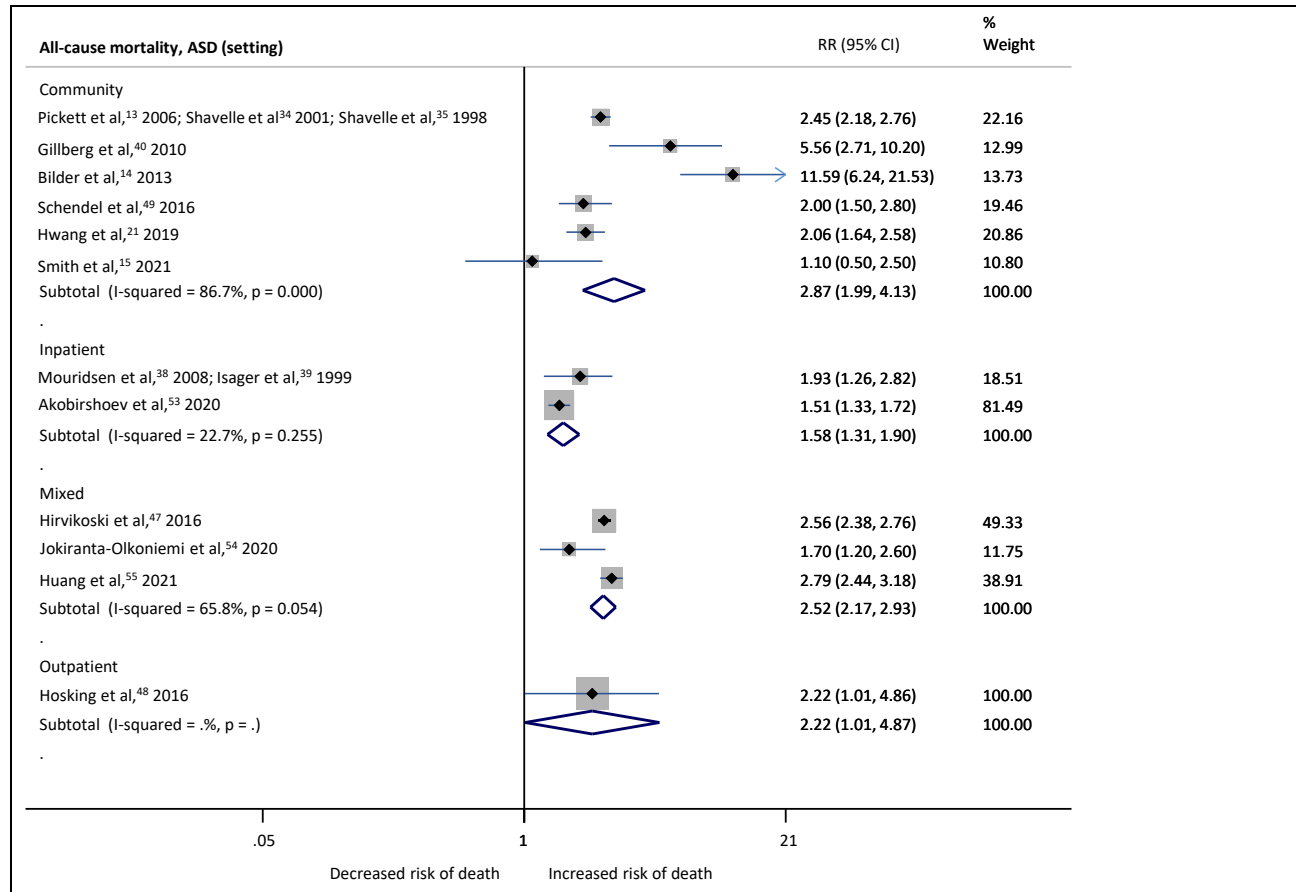

**eFigure 15. Subgroup analyses. Setting and all-cause mortality among ADHD people.**

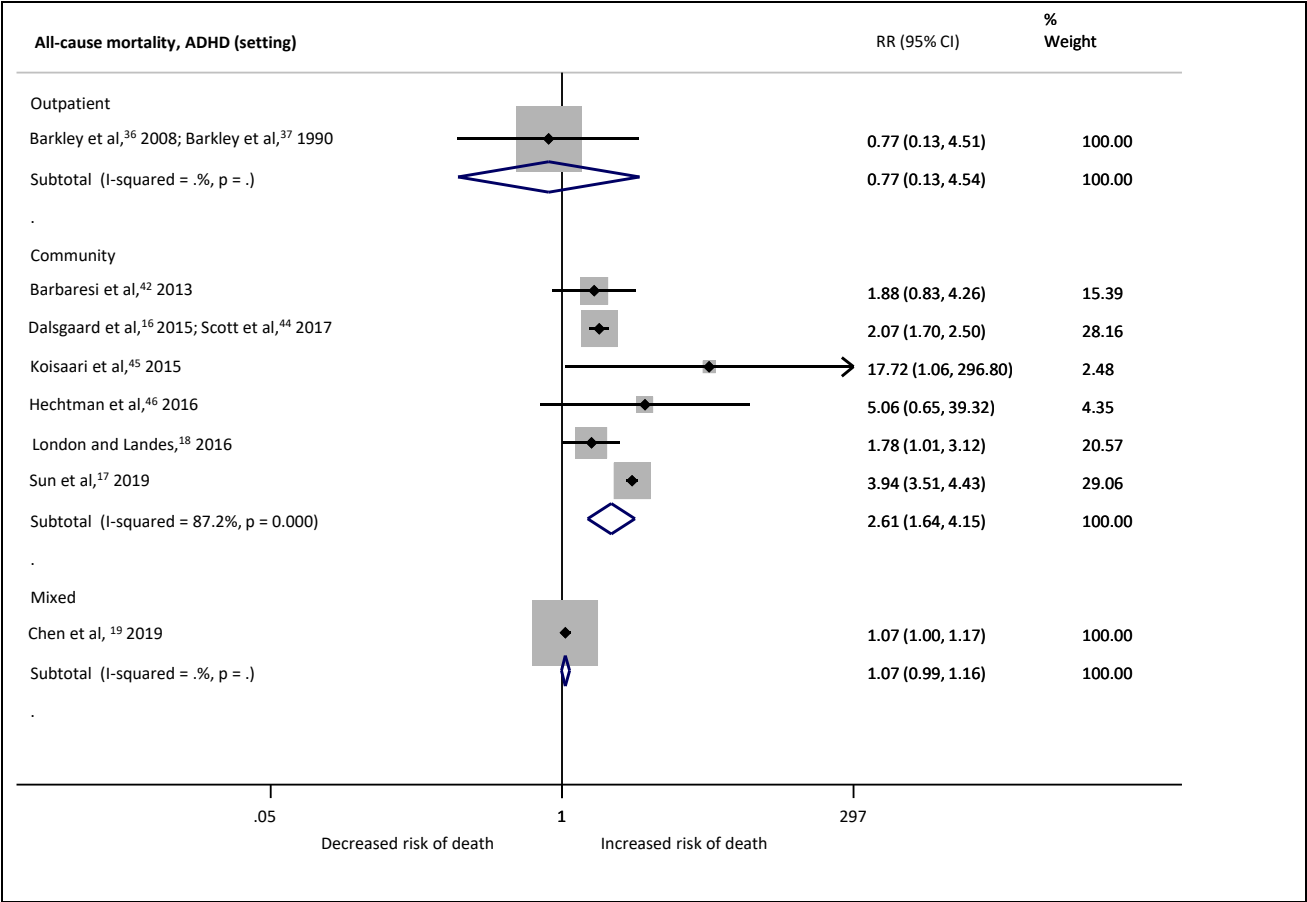

**eFigure 16. Subgroup analyses. Follow-up (in years) and all-cause mortality among ASD people.**

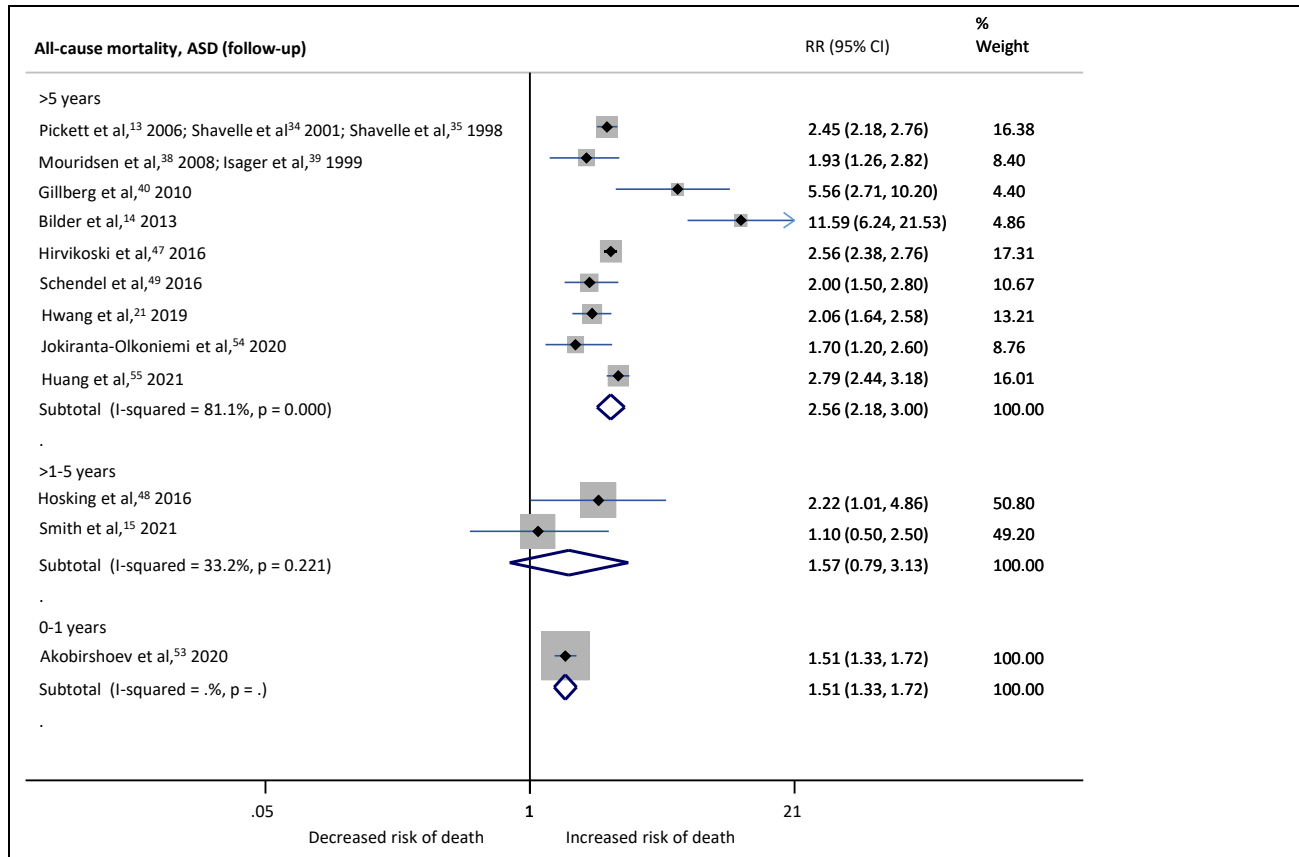



**eFigure 17. Subgroup analyses. Follow-up (in years) and all-cause mortality among ADHD people.**

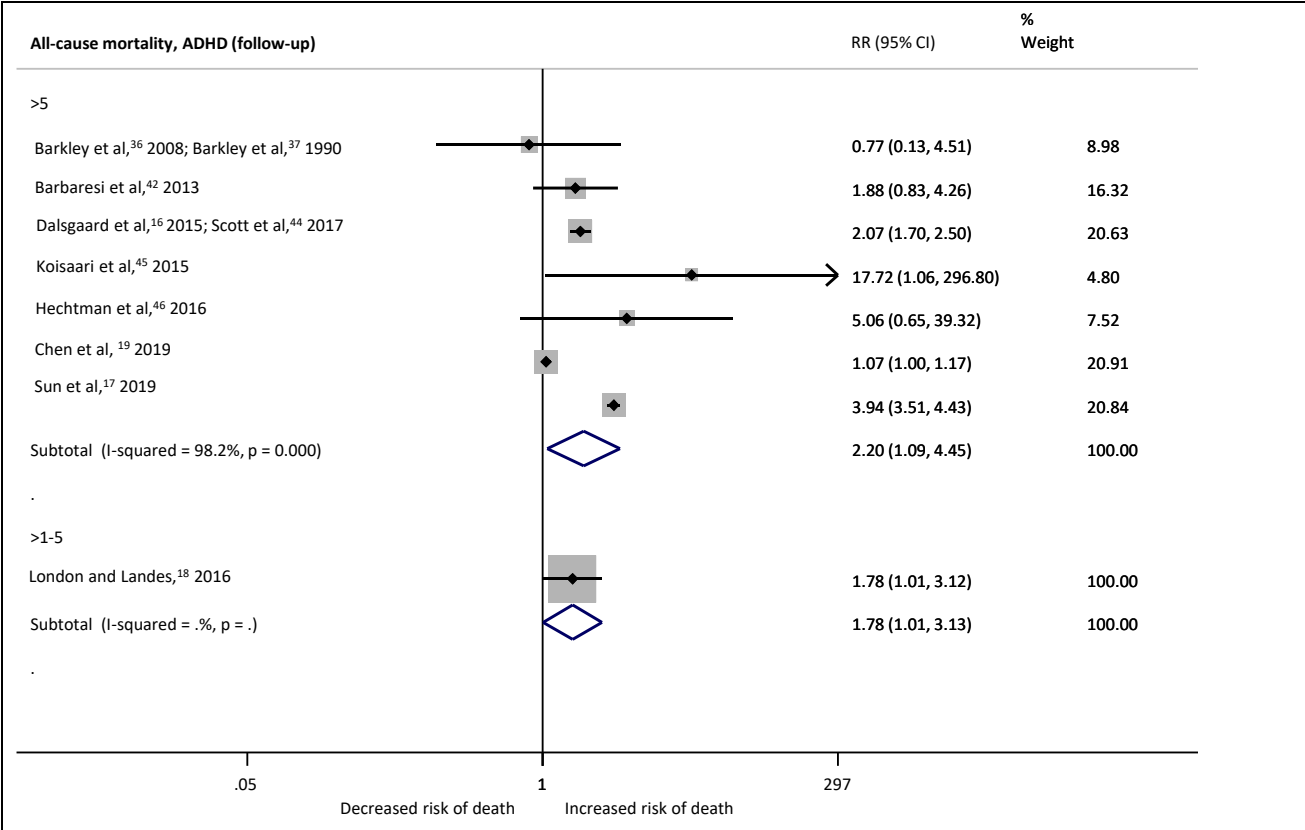

**eFigure 18. Subgroup analyses. Study-quality/risk of bias and all-cause mortality among ASD people.**

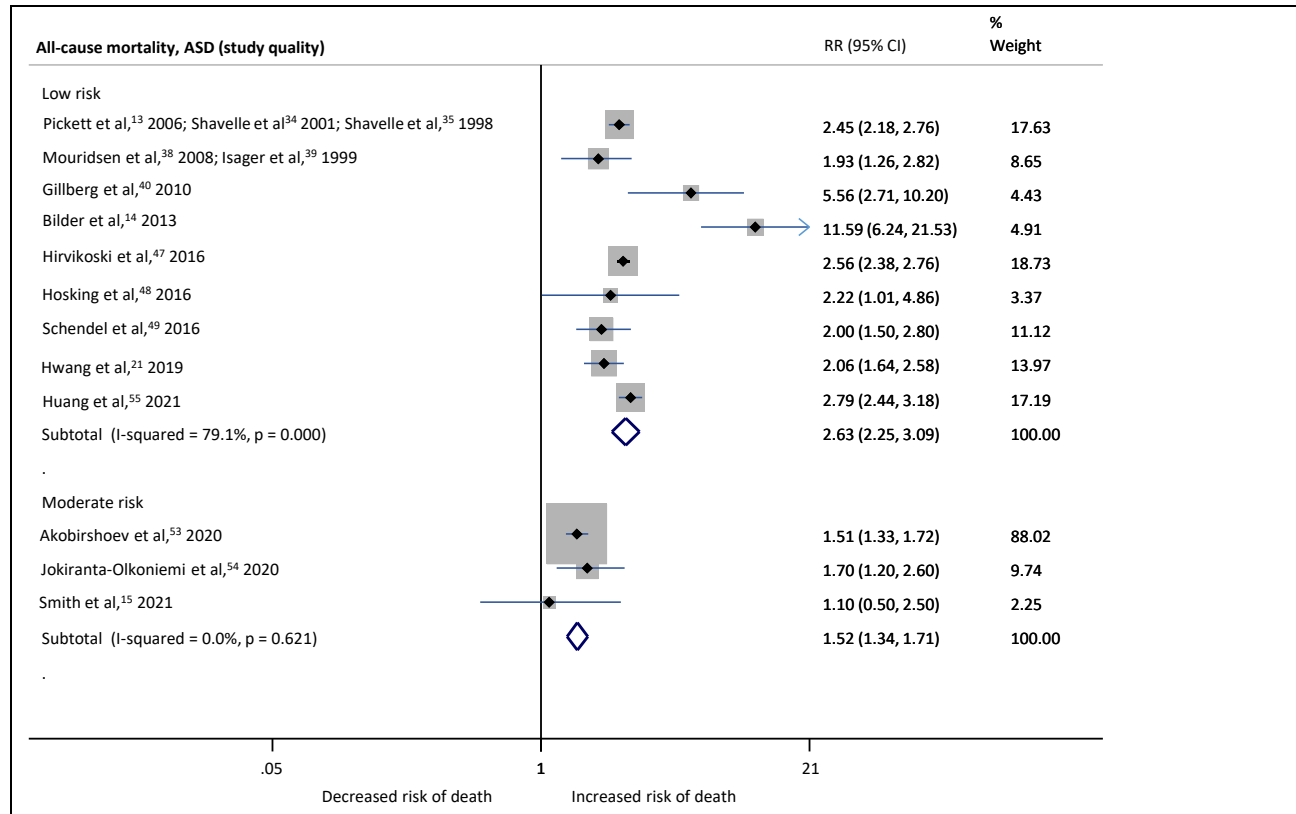

**eFigure 19. Subgroup analyses. Study-quality/risk of bias and all-cause mortality among ADHD people.**

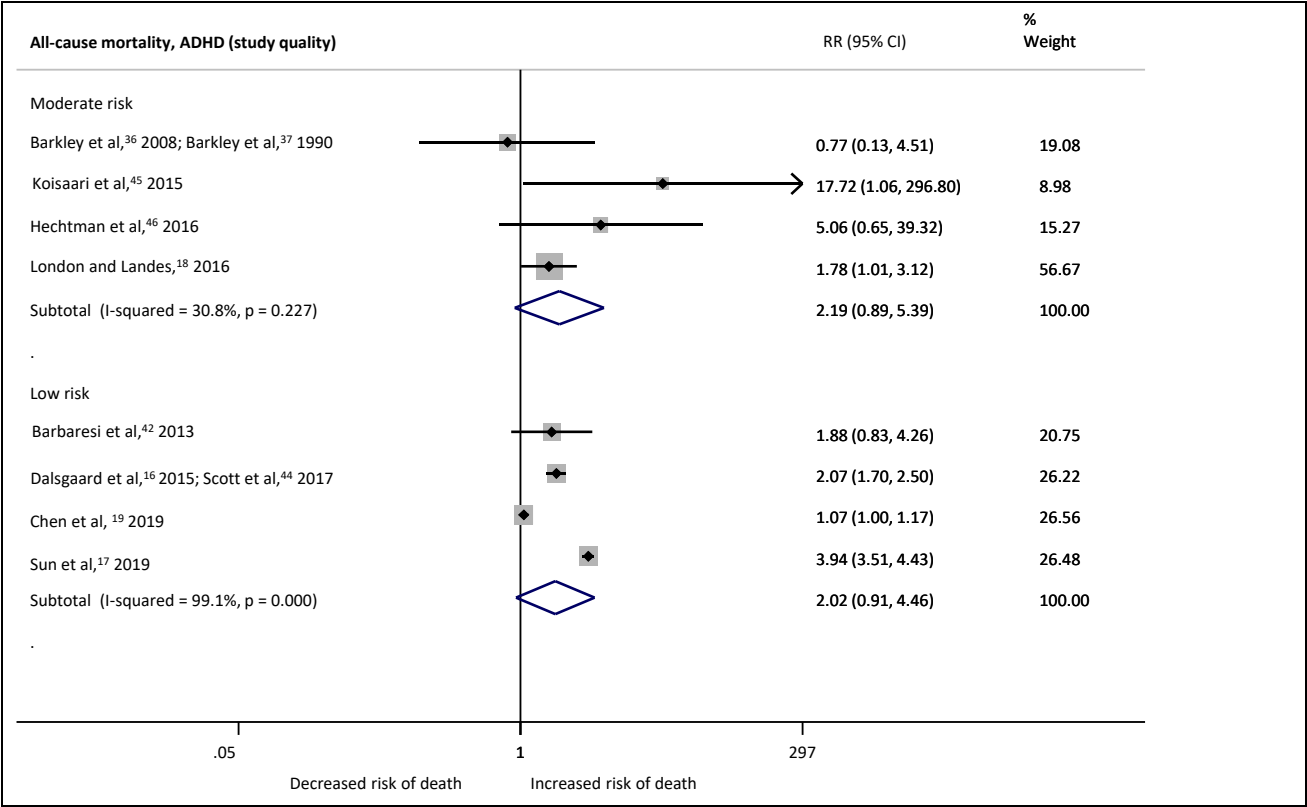

**eFigure 20. Subgroup analyses. Adjustment for potential confounders and all-cause mortality among ASD people.**

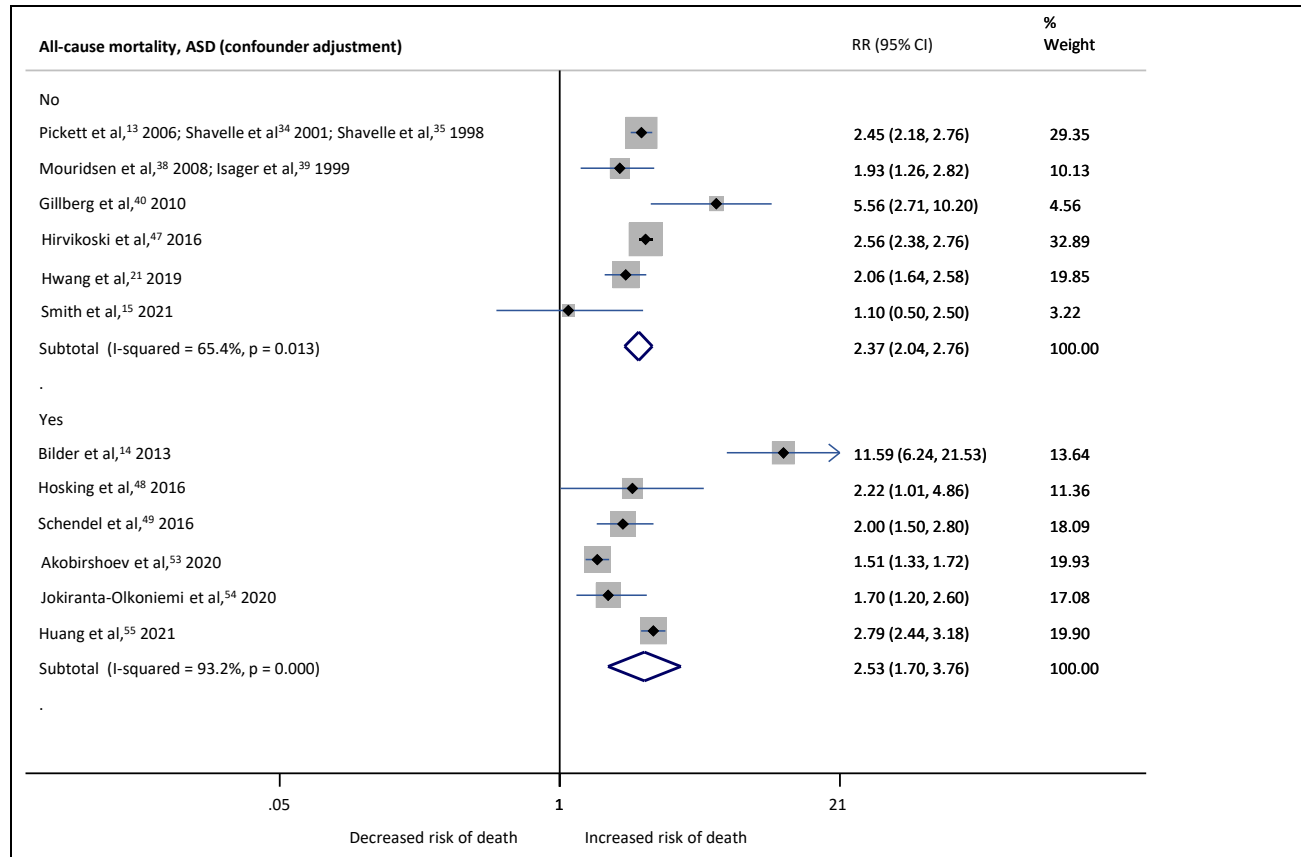

**eFigure 21. Subgroup analyses. Adjustment for potential confounders and all-cause mortality among ADHD people.**

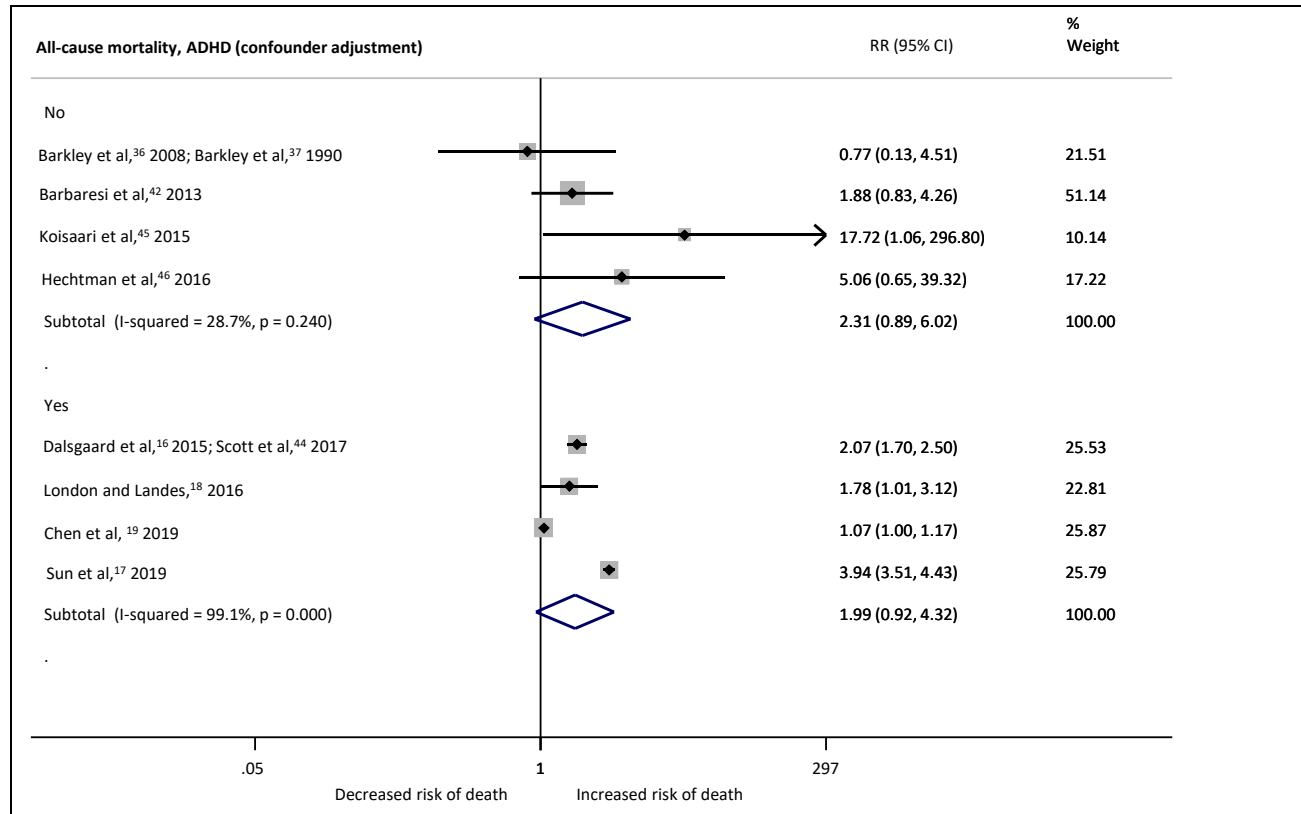

eFigure 22. Funnel plot for primary outcome of all-cause mortality in people with ASD.

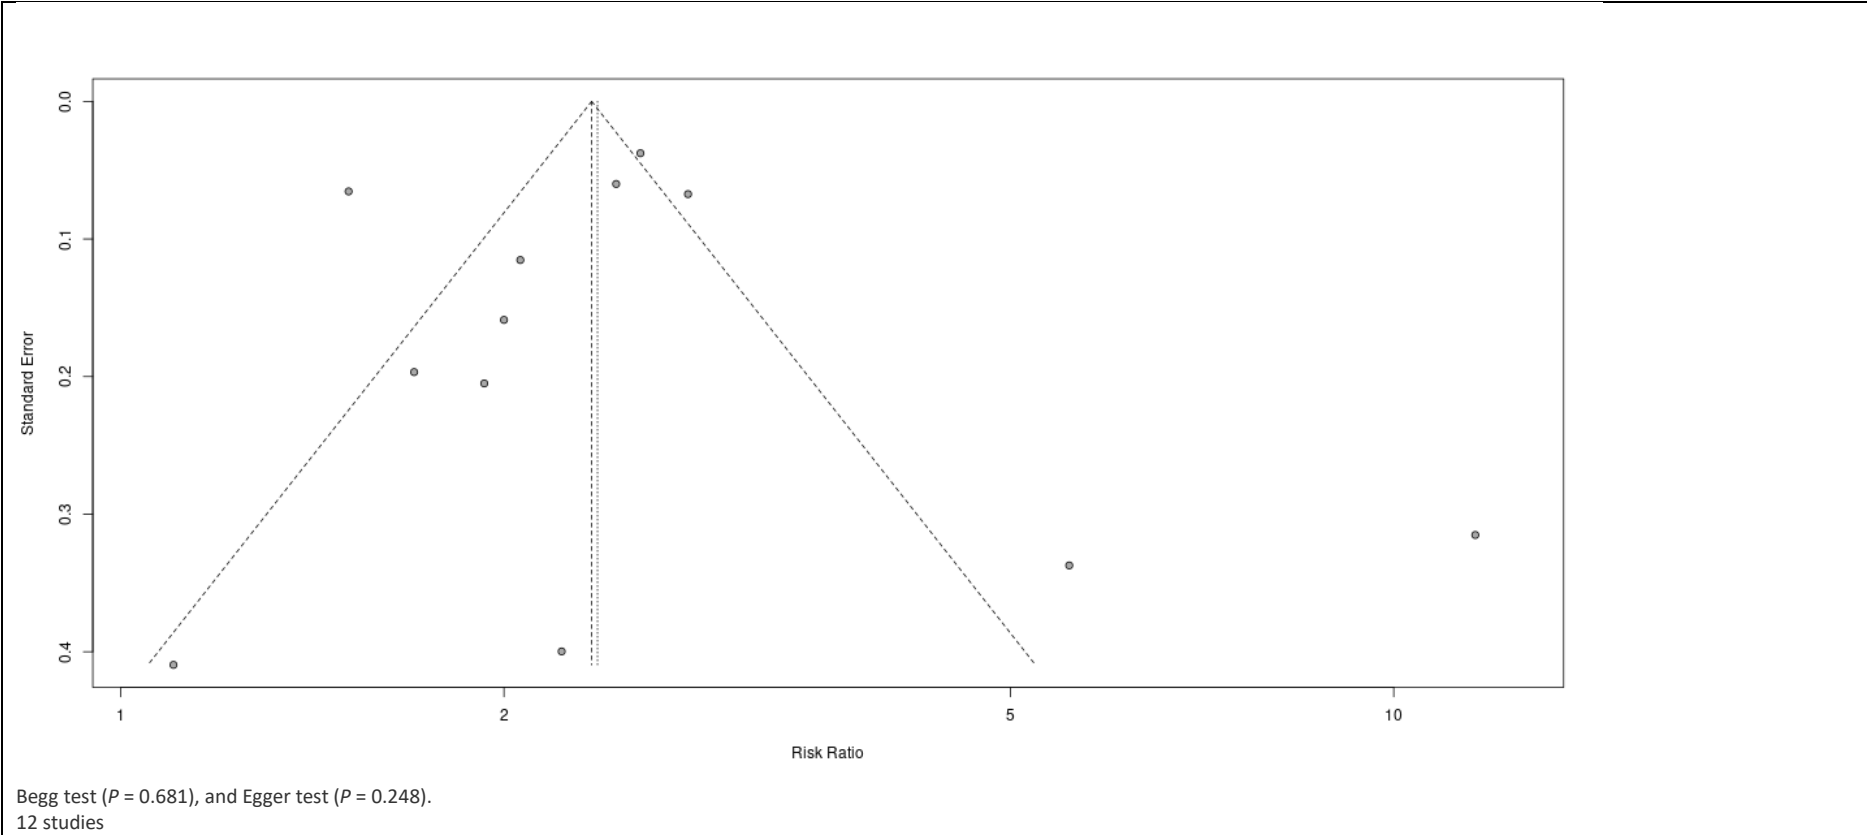

eFigure 23. Treemap summarizing the amount of data according to specific causes of death.

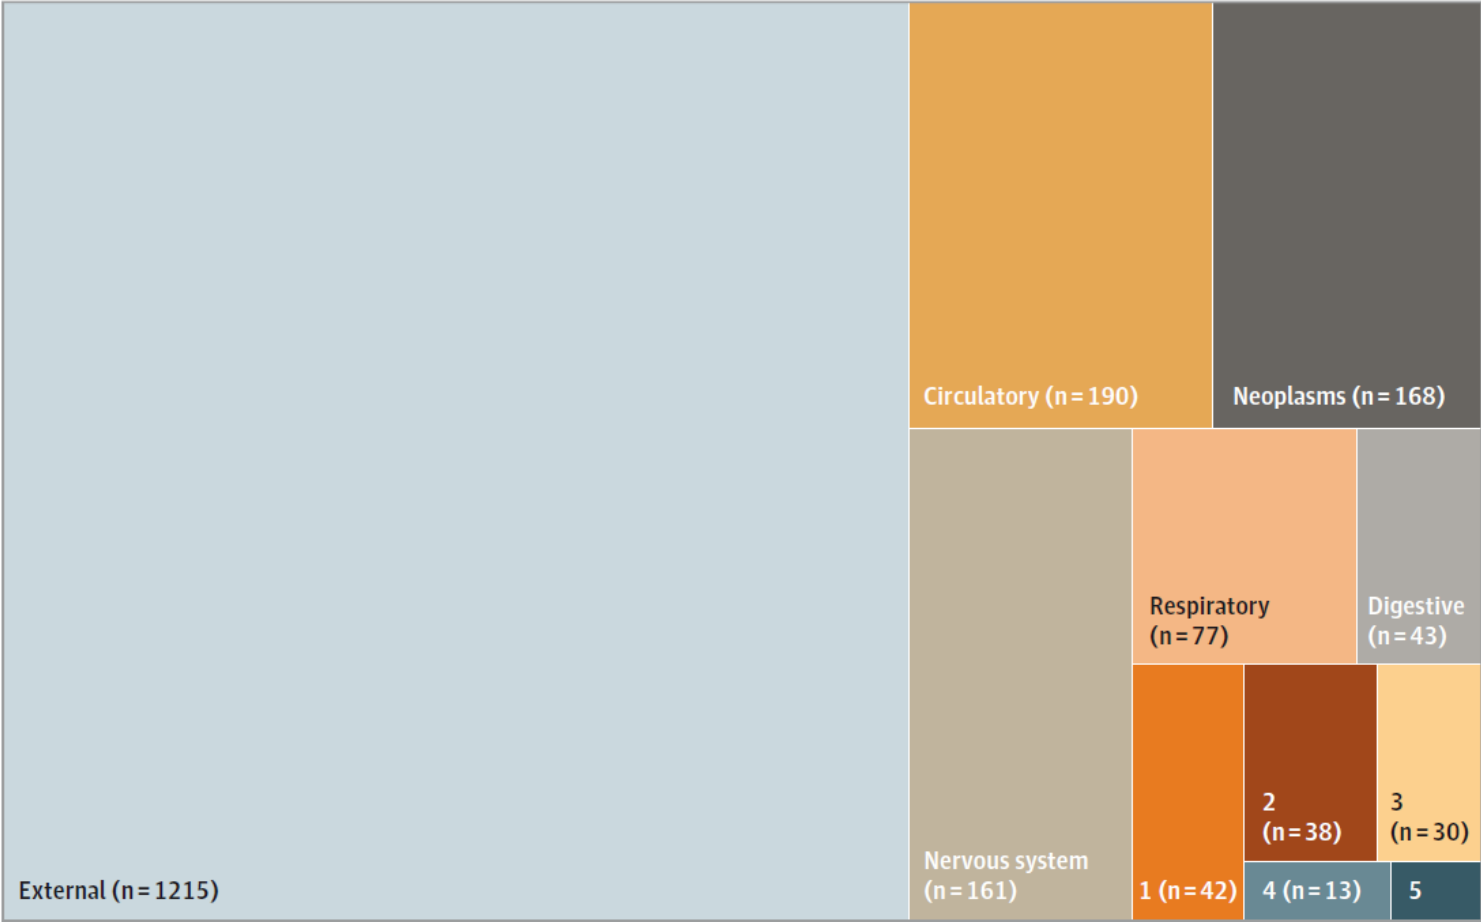

1 Indicates congenital anomalies (42 cases); 2, mental and behavioral disorders (38 cases); 3, endocrine, nutritional, and metabolic diseases (30 cases); 4, genitourinary system diseases (13 cases); and 5, infectious diseases (8 cases).
